# Supplementary material for: Continuous Morphological Variation Correlated with Genome Size Indicates Frequent Introgressive Hybridization among Diphasiastrum Species (Lycopodiaceae) in Central Europe
Source: PubMed Central journal article supplement (PMC4059668; doi:10.1371/journal.pone.0099552), 2014-06-16
Supplement: pone.0099552.s006.pdf [file pone.0099552.s006.pdf]

## Supporting Information Table S2: Primary data

### Flow cytometry

| locality                                        | ID          | date       | index | 1/index | 2C   | CV sample | CV std |
|-------------------------------------------------|-------------|------------|-------|---------|------|-----------|--------|
| CZ, Beskydy Mts, Kladnatá hill                  | BES 01      | 16.11.2010 | 1,235 | 0,810   | 7,36 | 2,40      | 2,04   |
|                                                 | BES 02      | 16.11.2010 | 1,234 | 0,810   | 7,37 | 2,55      | 2,03   |
|                                                 | BES 03      | 16.11.2010 | 1,619 | 0,618   | 5,61 | 2,71      | 1,96   |
|                                                 | BES 04      | 16.11.2010 | 1,210 | 0,826   | 7,51 | 2,82      | 2,54   |
|                                                 | BES 05      | 16.11.2010 | 1,239 | 0,807   | 7,34 | 2,26      | 2,10   |
|                                                 | BES 08      | 16.11.2010 | 1,698 | 0,589   | 5,35 | 2,82      | 1,97   |
|                                                 | BES 09      | 16.11.2010 | 1,259 | 0,794   | 7,22 | 2,44      | 2,08   |
| CZ, Brdy, Hutě pod Třemšínem, Kobyly hlava hill | TRI+P       | 13.7.2010  | 1,801 | 0,555   | 5,05 | 3,50      | 2,56   |
| CZ, Brdy, Věšín                                 | 1+P         | 11.5.2010  | 1,220 | 0,820   | 7,45 | 4,84      | 2,57   |
|                                                 | 2+P         | 11.5.2010  | 1,238 | 0,808   | 7,34 | 4,48      | 2,10   |
| CZ, Bohemian forest, Malinová hill              | Malin.H.1+P | 14.7.2010  | 1,415 | 0,707   | 6,42 | 3,16      | 2,49   |
|                                                 | Malin.H.2   | 14.7.2010  | 1,654 | 0,605   | 5,50 | 3,84      | 2,40   |
|                                                 | Malin.H.3   | 14.7.2010  | 1,396 | 0,716   | 6,51 | 2,79      | 2,49   |
|                                                 | Malin.H.4   | 14.7.2010  | 1,414 | 0,707   | 6,43 | 2,84      | 2,56   |
|                                                 | Malin.H.5   | 14.7.2010  | 1,241 | 0,806   | 7,32 | 2,85      | 2,05   |
|                                                 | Malin.H.6   | 16.7.2010  | 1,400 | 0,714   | 6,49 | 2,58      | 2,53   |
|                                                 | Malin.H.7   | 16.7.2010  | 1,426 | 0,701   | 6,37 | 3,35      | 2,84   |
|                                                 | Malin.H.8   | 16.7.2010  | 1,408 | 0,710   | 6,46 | 2,76      | 2,55   |
|                                                 | Malin.H.9   | 16.7.2010  | 1,430 | 0,699   | 6,36 | 4,27      | 2,87   |
|                                                 | Malin.H.10  | 16.7.2010  | 1,423 | 0,703   | 6,39 | 3,81      | 2,62   |
| CZ, Dolní Cerekev, Lysá hill                    | BES 06      | 16.11.2010 | 1,676 | 0,597   | 5,42 | 2,64      | 1,84   |
|                                                 | BES 07      | 16.11.2010 | 1,663 | 0,601   | 5,47 | 2,67      | 2,51   |
| CZ, Jeseníky Mts, Kamzičí hill                  | Je 1/1 +P   | 27.9.2010  | 1,184 | 0,845   | 7,68 | 3,32      | 1,87   |
|                                                 | Je 1/2      | 27.9.2010  | 1,195 | 0,837   | 7,61 | 3,18      | 2,43   |
|                                                 | Je 1/3      | 27.9.2010  | 1,185 | 0,844   | 7,67 | 3,35      | 2,11   |
|                                                 | Je 1/4      | 27.9.2010  | 1,222 | 0,818   | 7,44 | 1,93      | 2,02   |
| CZ, Jeseníky Mts, Praděd, Peter's rocks         | Je 3/1      | 27.9.2010  | 1,188 | 0,842   | 7,65 | 3,29      | 2,35   |
|                                                 | Je 3/2      | 27.9.2010  | 1,228 | 0,814   | 7,40 | 2,37      | 2,25   |
|                                                 | Je 3/3      | 27.9.2010  | 1,201 | 0,833   | 7,57 | 2,47      | 2,43   |
|                                                 | Je 3/4      | 27.9.2010  | 1,233 | 0,811   | 7,37 | 3,31      | 2,64   |
|                                                 | Je 3/5      | 27.9.2010  | 1,235 | 0,810   | 7,36 | 2,79      | 2,40   |
| CZ, Jeseníky Mts, Praděd, Table's rocks         | Je 2/1      | 27.9.2010  | 1,187 | 0,842   | 7,66 | 3,33      | 2,12   |
|                                                 | Je 2/2      | 27.9.2010  | 1,210 | 0,826   | 7,51 | 3,02      | 1,99   |
| CZ, Jeseníky Mts, Praděd, Vysoká hole hill      | Je 4/1      | 27.9.2010  | 1,214 | 0,824   | 7,49 | 2,57      | 2,03   |
|                                                 | Je 4/2      | 27.9.2010  | 1,213 | 0,824   | 7,49 | 2,49      | 2,05   |
|                                                 | RAMZ 01     | 4.11.2010  | 1,438 | 0,695   | 6,32 | 2,43      | 2,35   |
|                                                 | RAMZ 02     | 4.11.2010  | 1,794 | 0,557   | 5,07 | 2,41      | 2,39   |
|                                                 | RAMZ 03     | 4.11.2010  | 1,645 | 0,608   | 5,53 | 2,88      | 2,56   |
|                                                 | RAMZ 04     | 4.11.2010  | 1,221 | 0,819   | 7,44 | 2,09      | 2,53   |
|                                                 | RAMZ 05     | 4.11.2010  | 1,627 | 0,615   | 5,59 | 3,96      | 2,14   |
|                                                 | RAMZ 06     | 4.11.2010  | 1,662 | 0,602   | 5,47 | 2,81      | 2,89   |
|                                                 | RAMZ 07     | 4.11.2010  | 1,594 | 0,627   | 5,70 | 3,72      | 2,54   |
|                                                 | RAMZ 08     | 4.11.2010  | 1,827 | 0,547   | 4,98 | 3,19      | 2,47   |
|                                                 | RAMZ 09     | 4.11.2010  | 1,714 | 0,583   | 5,30 | 3,33      | 2,52   |
|                                                 | RAMZ 10     | 4.11.2010  | 1,417 | 0,706   | 6,41 | 3,14      | 2,58   |

|                                                 |            |            |       |       |      |      |      |
|-------------------------------------------------|------------|------------|-------|-------|------|------|------|
| CZ, Jeseníky Mts, Ramzová-<br>Černava ski slope | RAMZ 11    | 4.11.2010  | 1,419 | 0,705 | 6,41 | 2,34 | 2,30 |
|                                                 | RAMZ 12    | 4.11.2010  | 1,447 | 0,691 | 6,28 | 2,66 | 2,22 |
|                                                 | RAMZ 13    | 4.11.2010  | 1,826 | 0,548 | 4,98 | 2,94 | 2,65 |
|                                                 | R1+P       | 23.10.2009 | 1,651 | 0,606 | 5,51 | 2,64 | 1,84 |
|                                                 | R2+P       | 23.10.2009 | 1,718 | 0,582 | 5,29 | 2,83 | 2,43 |
|                                                 | R3+P       | 23.10.2009 | 1,658 | 0,603 | 5,48 | 2,95 | 2,15 |
|                                                 | R4+P       | 23.10.2009 | 1,692 | 0,591 | 5,37 | 2,74 | 1,89 |
|                                                 | R5+P       | 23.10.2009 | 1,833 | 0,546 | 4,96 | 2,79 | 2,06 |
|                                                 | R6+P       | 23.10.2009 | 1,741 | 0,574 | 5,22 | 2,61 | 1,96 |
|                                                 | R7+P       | 23.10.2009 | 1,686 | 0,593 | 5,39 | 2,47 | 1,51 |
|                                                 | R8+P       | 23.10.2009 | 1,617 | 0,618 | 5,62 | 2,89 | 2,17 |
|                                                 | R9+P       | 23.10.2009 | 1,249 | 0,801 | 7,28 | 2,81 | 2,27 |
|                                                 | R10+P      | 23.10.2009 | 1,419 | 0,705 | 6,41 | 2,76 | 2,39 |
|                                                 | R11+P      | 23.10.2009 | 1,650 | 0,606 | 5,51 | 2,73 | 2,16 |
|                                                 | R12+P      | 23.10.2009 | 1,663 | 0,601 | 5,47 | 2,64 | 1,93 |
|                                                 | R13+P      | 23.10.2009 | 1,742 | 0,574 | 5,22 | 2,78 | 2,31 |
|                                                 | R14+P      | 23.10.2009 | 1,744 | 0,573 | 5,21 | 2,80 | 2,49 |
|                                                 | R15+P      | 23.10.2009 | 1,647 | 0,607 | 5,52 | 2,70 | 2,58 |
|                                                 | R16+P      | 23.10.2009 | 1,249 | 0,801 | 7,28 | 2,81 | 2,27 |
|                                                 | R17+P      | 23.10.2009 | 1,655 | 0,604 | 5,49 | 3,51 | 2,71 |
|                                                 | R18+P      | 23.10.2009 | 1,782 | 0,561 | 5,10 | 2,73 | 2,61 |
|                                                 | R19+P      | 23.10.2009 | 1,426 | 0,701 | 6,37 | 2,91 | 2,08 |
|                                                 | R20+P      | 23.10.2009 | 1,675 | 0,597 | 5,43 | 2,81 | 2,26 |
|                                                 | R21+P      | 23.10.2009 | 1,838 | 0,544 | 4,95 | 2,82 | 2,06 |
|                                                 | R22+P      | 23.10.2009 | 1,264 | 0,791 | 7,19 | 2,88 | 2,34 |
|                                                 | R23+P      | 23.10.2009 | 1,465 | 0,683 | 6,20 | 2,90 | 2,22 |
|                                                 | R24+P      | 23.10.2009 | 1,693 | 0,591 | 5,37 | 2,39 | 2,40 |
|                                                 | R25+P      | 23.10.2009 | 1,272 | 0,786 | 7,15 | 2,25 | 1,83 |
|                                                 | R26+P      | 23.10.2009 | 1,243 | 0,805 | 7,31 | 2,35 | 2,49 |
|                                                 | R27+P      | 23.10.2009 | 1,782 | 0,561 | 5,10 | 2,73 | 2,61 |
|                                                 | R28+P      | 23.10.2009 | 1,596 | 0,627 | 5,70 | 3,95 | 2,75 |
|                                                 | R29+P      | 23.10.2009 | 1,642 | 0,609 | 5,54 | 2,80 | 1,94 |
|                                                 | R30+P      | 23.10.2009 | 1,643 | 0,609 | 5,53 | 2,86 | 2,13 |
|                                                 | R31+P      | 23.10.2009 | 1,256 | 0,796 | 7,24 | 2,67 | 2,50 |
|                                                 | R32+P      | 23.10.2009 | 1,680 | 0,595 | 5,41 | 2,68 | 2,34 |
|                                                 | R33+P      | 23.10.2009 | 1,671 | 0,598 | 5,44 | 2,85 | 2,35 |
|                                                 | R34+P      | 23.10.2009 | 1,685 | 0,593 | 5,39 | 3,52 | 2,57 |
|                                                 | R35+P      | 23.10.2009 | 1,442 | 0,693 | 6,30 | 2,78 | 2,58 |
|                                                 | R36+P      | 23.10.2009 | 1,672 | 0,598 | 5,44 | 2,78 | 2,44 |
|                                                 | R37+P      | 23.10.2009 | 1,819 | 0,550 | 5,00 | 2,54 | 2,45 |
|                                                 | R38+P      | 26.10.2009 | 1,720 | 0,581 | 5,28 | 2,70 | 2,34 |
|                                                 | R39+P      | 26.10.2009 | 1,414 | 0,707 | 6,43 | 2,48 | 1,79 |
|                                                 | R40+P      | 26.10.2009 | 1,629 | 0,614 | 5,58 | 2,59 | 1,76 |
|                                                 | R41+P      | 26.10.2009 | 1,230 | 0,813 | 7,39 | 2,39 | 1,91 |
|                                                 | R42+P      | 26.10.2009 | 1,814 | 0,551 | 5,01 | 2,59 | 2,20 |
| R43+P                                           | 26.10.2009 | 1,695      | 0,590 | 5,36  | 2,99 | 1,99 |      |
| R44+P                                           | 26.10.2009 | 1,613      | 0,620 | 5,64  | 2,74 | 1,92 |      |
| R45+P                                           | 26.10.2009 | 1,727      | 0,579 | 5,26  | 2,71 | 1,85 |      |
|                                                 | Je 6/1     | 27.9.2010  | 1,216 | 0,822 | 7,48 | 3,88 | 1,79 |
|                                                 | Je 6/1a    | 27.9.2010  | 1,267 | 0,789 | 7,17 | 2,77 | 2,78 |

|                                         |                                    |            |           |       |       |      |      |
|-----------------------------------------|------------------------------------|------------|-----------|-------|-------|------|------|
| CZ, Jeseníky Mts, Snow basin            | Je 6/2                             | 27.9.2010  | 1,232     | 0,812 | 7,38  | 2,27 | 2,48 |
|                                         | Je 6/3                             | 27.9.2010  | 1,219     | 0,820 | 7,46  | 3,18 | 2,54 |
|                                         | Je 6/4                             | 27.9.2010  | 1,260     | 0,794 | 7,21  | 3,07 | 2,64 |
|                                         | Je 6/5                             | 27.9.2010  | 1,246     | 0,803 | 7,30  | 3,27 | 2,71 |
|                                         | Je 6/6                             | 27.9.2010  | 1,224     | 0,817 | 7,43  | 2,24 | 2,39 |
|                                         | Je 6/7                             | 27.9.2010  | 1,228     | 0,814 | 7,40  | 3,67 | 2,95 |
|                                         | Je 6/8                             | 27.9.2010  | 1,217     | 0,822 | 7,47  | 3,46 | 2,91 |
|                                         | Je 6/9                             | 27.9.2010  | 1,197     | 0,835 | 7,59  | 2,76 | 2,71 |
|                                         | Je 6/10                            | 27.9.2010  | 1,200     | 0,833 | 7,58  | 3,71 | 2,42 |
|                                         | CZ, Jeseníky Mts, Vysoká hole hill | Je 5/1     | 27.9.2010 | 1,253 | 0,798 | 7,25 | 2,60 |
| Je 5/2                                  |                                    | 27.9.2010  | 1,227     | 0,815 | 7,41  | 3,17 | 2,75 |
| Je 5/3                                  |                                    | 27.9.2010  | 1,208     | 0,828 | 7,52  | 4,11 | 3,16 |
| Je 5/3a                                 |                                    | 27.9.2010  | 1,224     | 0,817 | 7,43  | 3,94 | 2,93 |
| Je 5/4                                  |                                    | 27.9.2010  | 1,230     | 0,813 | 7,39  | 3,62 | 2,57 |
| Je 5/6                                  |                                    | 27.9.2010  | 1,238     | 0,808 | 7,34  | 3,99 | 3,26 |
| CZ, Kaproun, Červenka forest            | K1+P                               | 10.12.2009 | 1,871     | 0,534 | 4,86  | 2,71 | 2,14 |
|                                         | K2+P                               | 10.12.2009 | 1,700     | 0,588 | 5,35  | 2,92 | 2,39 |
|                                         | K3+P                               | 10.12.2009 | 1,876     | 0,533 | 4,85  | 3,73 | 2,04 |
|                                         | K4+P                               | 10.12.2009 | 1,842     | 0,543 | 4,93  | 3,05 | 1,75 |
|                                         | K5+P                               | 10.12.2009 | 1,660     | 0,602 | 5,48  | 2,65 | 1,62 |
|                                         | K6+P                               | 10.12.2009 | 1,873     | 0,534 | 4,85  | 2,86 | 2,38 |
|                                         | K7+P                               | 10.12.2009 | 1,845     | 0,542 | 4,93  | 2,71 | 3,29 |
|                                         | K8+P                               | 10.12.2009 | 1,820     | 0,549 | 4,99  | 3,22 | 1,72 |
| CZ, Krkonoše Mts, Herlíkovice ski slope | KR2-1                              | 9.9.2009   | 1,680     | 0,595 | 5,41  | 2,80 | 2,44 |
|                                         | KR2-2                              | 8.9.2009   | 1,656     | 0,604 | 5,49  | 2,74 | 2,49 |
|                                         | KR2A                               | 8.9.2009   | 1,679     | 0,596 | 5,41  | 2,55 | 2,03 |
|                                         | KR2B-1                             | 8.9.2009   | 1,647     | 0,607 | 5,52  | 2,47 | 2,54 |
|                                         | KR2B-2                             | 8.9.2009   | 1,647     | 0,607 | 5,52  | 2,96 | 2,27 |
|                                         | KR2B-3                             | 8.9.2009   | 1,629     | 0,614 | 5,58  | 2,39 | 2,09 |
|                                         | KR2-3                              | 8.9.2009   | 1,660     | 0,602 | 5,48  | 2,63 | 2,64 |
| CZ, Krkonoše Mts, Herlíkovice ski slope | KR3-1                              | 8.9.2009   | 1,441     | 0,694 | 6,31  | 3,10 | 2,26 |
|                                         | KR3-2                              | 8.9.2009   | 1,485     | 0,673 | 6,12  | 2,62 | 2,02 |
| CZ, Krkonoše Mts, Husí challets         | KR4-1                              | 8.9.2009   | 1,825     | 0,548 | 4,98  | 2,70 | 2,01 |
|                                         | KR4-2                              | 7.9.2009   | 1,266     | 0,790 | 7,18  | 2,59 | 2,15 |
|                                         | KR4-3                              | 7.9.2009   | 1,268     | 0,789 | 7,17  | 2,26 | 1,83 |
| CZ, Krkonoše Mts, Kotelní jáma          | KRK3                               | 6.9.2011   | 1,284     | 0,779 | 7,08  | 3,06 | 3,31 |
| CZ, Krkonoše Mts, Luční challet         | KRK4                               | 6.9.2011   | 1,276     | 0,784 | 7,12  | 3,04 | 2,80 |
|                                         | KR1-1                              | 7.9.2009   | 1,846     | 0,542 | 4,92  | 2,84 | 2,00 |
|                                         | KR1-2                              | 7.9.2009   | 1,680     | 0,595 | 5,41  | 2,90 | 2,68 |
|                                         | KR1-3                              | 7.9.2009   | 1,516     | 0,660 | 6,00  | 2,92 | 2,32 |
|                                         | KR1-4                              | 7.9.2009   | 1,722     | 0,581 | 5,28  | 2,90 | 3,64 |
|                                         | KR1-5                              | 7.9.2009   | 1,893     | 0,528 | 4,80  | 2,88 | 1,96 |
|                                         | KR1-6                              | 7.9.2009   | 1,442     | 0,693 | 6,30  | 2,37 | 1,63 |
|                                         | KR1-7                              | 7.9.2009   | 1,537     | 0,651 | 5,91  | 2,50 | 2,80 |
|                                         | KR1-8                              | 7.9.2009   | 1,719     | 0,582 | 5,29  | 2,67 | 2,32 |
|                                         | KR1-9                              | 8.9.2009   | 1,456     | 0,687 | 6,24  | 2,57 | 1,72 |
|                                         | KR1-10                             | 8.9.2009   | 1,562     | 0,640 | 5,82  | 3,28 | 3,85 |
|                                         | KR1-11                             | 8.9.2009   | 1,855     | 0,539 | 4,90  | 2,89 | 2,50 |
|                                         | KR1-12                             | 8.9.2009   | 1,868     | 0,535 | 4,87  | 2,82 | 1,86 |

|                                         |                          |            |           |       |       |      |      |      |
|-----------------------------------------|--------------------------|------------|-----------|-------|-------|------|------|------|
| CZ, Krkonoše Mts, Medvědin<br>ski slope | KR1-13                   | 8.9.2009   | 1,723     | 0,580 | 5,28  | 2,76 | 2,85 |      |
|                                         | KR1-14                   | 8.9.2009   | 1,851     | 0,540 | 4,91  | 3,53 | 2,23 |      |
|                                         | KR1-15                   | 8.9.2009   | 1,506     | 0,664 | 6,04  | 2,75 | 2,49 |      |
|                                         | KR1-16                   | 8.9.2009   | 1,866     | 0,536 | 4,87  | 2,63 | 1,84 |      |
|                                         | KR1-17                   | 7.9.2009   | 1,522     | 0,657 | 5,97  | 2,39 | 2,51 |      |
|                                         | KR1-18                   | 7.9.2009   | 1,290     | 0,775 | 7,05  | 2,15 | 2,11 |      |
|                                         | KR1-19                   | 7.9.2009   | 1,880     | 0,532 | 4,84  | 3,52 | 2,68 |      |
|                                         | KR1-20                   | 7.9.2009   | 1,860     | 0,538 | 4,89  | 3,39 | 2,43 |      |
|                                         | KR1-21                   | 9.9.2009   | 1,276     | 0,784 | 7,12  | 2,37 | 1,64 |      |
|                                         | KR1-22                   | 9.9.2009   | 1,476     | 0,678 | 6,16  | 1,67 | 2,61 |      |
|                                         | KR1-23                   | 8.9.2009   | 1,527     | 0,655 | 5,95  | 2,78 | 2,00 |      |
|                                         | KR1-24                   | 8.9.2009   | 1,497     | 0,668 | 6,07  | 2,68 | 1,88 |      |
|                                         | KR1-25                   | 8.9.2009   | 1,800     | 0,556 | 5,05  | 2,23 | 1,56 |      |
|                                         | KR1-26                   | 8.9.2009   | 1,453     | 0,688 | 6,26  | 2,80 | 2,44 |      |
|                                         | KR1-27                   | 8.9.2009   | 1,512     | 0,661 | 6,01  | 3,32 | 3,09 |      |
|                                         | KR1-28                   | 8.9.2009   | 1,869     | 0,535 | 4,86  | 3,15 | 2,45 |      |
|                                         | KR1-29                   | 8.9.2009   | 1,651     | 0,606 | 5,51  | 2,91 | 2,12 |      |
|                                         | KR1-30                   | 8.9.2009   | 1,816     | 0,551 | 5,01  | 3,30 | 2,52 |      |
|                                         | KR1-31                   | 8.9.2009   | 1,645     | 0,608 | 5,53  | 2,25 | 2,06 |      |
|                                         | KR1-32                   | 8.9.2009   | 1,482     | 0,675 | 6,13  | 2,86 | 2,66 |      |
|                                         | KR1-33                   | 8.9.2009   | 1,500     | 0,667 | 6,06  | 2,57 | 1,56 |      |
|                                         | KR1-34                   | 9.9.2009   | 1,506     | 0,664 | 6,04  | 2,71 | 2,26 |      |
|                                         | KRK1 -1                  |            | 6.9.2011  | 1,562 | 0,640 | 5,82 | 3,58 | 3,18 |
|                                         |                          |            | 2.11.2011 | 1,490 | 0,671 | 6,10 | 2,63 | 2,67 |
|                                         |                          |            | 3.11.2011 | 1,540 | 0,649 | 5,90 | 2,64 | 2,45 |
|                                         |                          |            | 1.11.2011 | 1,774 | 0,564 | 5,12 | 3,63 | 3,05 |
|                                         |                          |            | 2.11.2011 | 1,856 | 0,539 | 4,90 | 2,97 | 2,62 |
|                                         |                          |            | 3.11.2011 | 1,837 | 0,544 | 4,95 | 3,07 | 2,39 |
|                                         | KRK1 -3                  |            | 1.11.2011 | 1,496 | 0,668 | 6,08 | 3,43 | 3,14 |
|                                         |                          |            | 2.11.2011 | 1,508 | 0,663 | 6,03 | 3,09 | 1,48 |
|                                         |                          |            | 3.11.2011 | 1,490 | 0,671 | 6,10 | 2,77 | 2,83 |
|                                         | CZ, Krušné Mts, Boží Dar | 1+P        | 7.7.2010  | 1,248 | 0,801 | 7,28 | 2,20 | 2,06 |
|                                         |                          | 2+P        | 8.7.2010  | 1,233 | 0,811 | 7,37 | 2,37 | 2,52 |
|                                         |                          | 3+P        | 8.7.2010  | 1,243 | 0,805 | 7,31 | 2,35 | 2,42 |
| 4+P                                     |                          | 8.7.2010   | 1,248     | 0,801 | 7,28  | 2,78 | 2,71 |      |
| 5+P                                     |                          | 8.7.2010   | 1,236     | 0,809 | 7,35  | 2,71 | 2,13 |      |
| 6+P                                     |                          | 8.7.2010   | 1,237     | 0,808 | 7,35  | 3,09 | 2,10 |      |
| CZ, Krušné Mts, Horní Blatná            | 1+P                      | 7.7.2010   | 1,442     | 0,693 | 6,30  | 3,08 | 2,15 |      |
|                                         | 2+P                      | 7.7.2010   | 1,415     | 0,707 | 6,42  | 3,44 | 2,28 |      |
|                                         | 3+P                      | 7.7.2010   | 1,424     | 0,702 | 6,38  | 3,67 | 2,69 |      |
| CZ, Krušné Mts, Kalek                   | KAL 1                    | 5.9.2011   | 1,660     | 0,602 | 5,48  | 2,34 | 2,07 |      |
|                                         |                          | 1.11.2011  | 1,666     | 0,600 | 5,46  | 3,25 | 1,83 |      |
|                                         |                          | 3.11.2011  | 1,700     | 0,588 | 5,35  | 2,87 | 2,85 |      |
|                                         | KAL 2                    | 5.9.2011   | 1,680     | 0,595 | 5,41  | 3,03 | 2,10 |      |
|                                         |                          | 1.11.2011  | 1,693     | 0,591 | 5,37  | 2,68 | 2,35 |      |
|                                         |                          | 3.11.2011  | 1,683     | 0,594 | 5,40  | 2,96 | 2,50 |      |
| RYŽ 1                                   |                          | 31.10.2011 | 1,676     | 0,597 | 5,42  | 2,78 | 2,15 |      |
|                                         |                          | 1.11.2011  | 1,673     | 0,598 | 5,43  | 2,93 | 2,50 |      |
|                                         |                          | 3.11.2011  | 1,682     | 0,595 | 5,40  | 2,85 | 2,50 |      |
|                                         |                          | 5.9.2011   | 1,266     | 0,790 | 7,18  | 2,73 | 2,54 |      |
| RYŽ 2                                   |                          |            |           |       |       |      |      |      |

|                                         |           |            |       |       |      |      |      |
|-----------------------------------------|-----------|------------|-------|-------|------|------|------|
| CZ, Krušné Mts, Ryzovna                 |           | 1.11.2011  | 1,267 | 0,789 | 7,17 | 2,97 | 2,51 |
|                                         |           | 3.11.2011  | 1,297 | 0,771 | 7,01 | 2,23 | 1,64 |
|                                         | RYŽ 3     | 5.9.2011   | 1,254 | 0,797 | 7,25 | 2,11 | 2,48 |
|                                         |           | 1.11.2011  | 1,261 | 0,793 | 7,21 | 2,99 | 2,62 |
|                                         |           | 3.11.2011  | 1,273 | 0,786 | 7,14 | 2,83 | 2,44 |
| CZ, Krušné Mts, Výsluní                 | VÝSL 1    | 5.9.2011   | 1,694 | 0,590 | 5,37 | 2,86 | 2,36 |
|                                         |           | 1.11.2011  | 1,703 | 0,587 | 5,34 | 2,57 | 2,12 |
|                                         |           | 2.11.2011  | 1,725 | 0,580 | 5,27 | 2,95 | 1,77 |
|                                         | VÝSL 2    | 5.9.2011   | 1,673 | 0,598 | 5,43 | 2,87 | 2,19 |
|                                         |           | 1.11.2011  | 1,681 | 0,595 | 5,41 | 2,71 | 2,11 |
|                                         |           | 3.11.2011  | 1,672 | 0,598 | 5,44 | 3,20 | 2,35 |
|                                         | VÝSL 3    | 1.11.2011  | 1,693 | 0,591 | 5,37 | 2,82 | 2,44 |
|                                         |           | 2.11.2011  | 1,695 | 0,590 | 5,36 | 2,72 | 2,86 |
|                                         | 3.11.2011 | 1,702      | 0,588 | 5,34  | 2,82 | 2,24 |      |
| CZ, Orlické Mts, Sedloňov, Polom hill   | POL 1+P   | 2.8.2010   | 1,795 | 0,557 | 5,06 | 2,88 | 1,93 |
|                                         | POL 2     | 2.8.2010   | 1,826 | 0,548 | 4,98 | 3,19 | 2,36 |
|                                         | POL 3     | 2.8.2010   | 1,794 | 0,557 | 5,07 | 3,49 | 2,95 |
|                                         | POL 4     | 2.8.2010   | 1,822 | 0,549 | 4,99 | 2,82 | 2,80 |
|                                         | POL 5     | 2.8.2010   | 1,847 | 0,541 | 4,92 | 3,90 | 2,61 |
|                                         | POL 5     | 4.11.2010  | 1,825 | 0,548 | 4,98 | 3,63 | 2,37 |
|                                         | POL 5     | 3.3.2011   | 1,847 | 0,541 | 4,92 | 1,88 | 1,71 |
|                                         | POL 6     | 2.8.2010   | 1,828 | 0,547 | 4,97 | 4,05 | 2,45 |
|                                         | POL 7     | 2.8.2010   | 1,743 | 0,574 | 5,22 | 3,82 | 3,11 |
|                                         | POL 8     | 2.8.2010   | 1,830 | 0,546 | 4,97 | 4,41 | 3,27 |
| POL 9                                   | 2.8.2010  | 1,826      | 0,548 | 4,98  | 4,05 | 2,86 |      |
| CZ, Radhošťské Beskydy Mts, Krásná hill | BESK1     | 8.12.2010  | 1,660 | 0,602 | 5,48 | 2,25 | 1,78 |
|                                         | BESK2     | 8.12.2010  | 1,675 | 0,597 | 5,43 | 2,89 | 2,25 |
|                                         | BESK3     | 8.12.2010  | 1,595 | 0,627 | 5,70 | 3,60 | 2,05 |
|                                         | BESK4     | 8.12.2010  | 1,669 | 0,599 | 5,45 | 2,37 | 1,74 |
|                                         | BESK5     | 8.12.2010  | 1,702 | 0,588 | 5,34 | 2,18 | 1,82 |
| CZ, Sklené nad Oslavou                  | SK1+P     | 26.10.2009 | 1,658 | 0,603 | 5,48 | 2,50 | 2,10 |
|                                         | SK1       | 10.12.2009 | 1,688 | 0,592 | 5,39 | 3,41 | 2,08 |
|                                         | SK2+P     | 26.10.2009 | 1,667 | 0,600 | 5,45 | 2,92 | 2,09 |
|                                         | SK3+P     | 26.10.2009 | 1,638 | 0,611 | 5,55 | 2,32 | 1,95 |
|                                         | SK3       | 10.12.2009 | 1,656 | 0,604 | 5,49 | 2,67 | 1,76 |
| CZ, Slavkovský les, Bečov nad Teplou    | BEČ 1+P   | 14.9.2010  | 1,697 | 0,589 | 5,36 | 3,62 | 2,11 |
|                                         | BEČ 2     | 14.9.2010  | 1,679 | 0,596 | 5,41 | 4,65 | 2,92 |
|                                         | BEČ 3     | 14.9.2010  | 1,675 | 0,597 | 5,43 | 4,29 | 2,34 |
|                                         | BEČ 4     | 14.9.2010  | 1,648 | 0,607 | 5,52 | 3,74 | 2,97 |
|                                         | BEČ 5     | 14.9.2010  | 1,667 | 0,600 | 5,45 | 4,74 | 2,71 |
|                                         | BEČ 6     | 14.9.2010  | 1,421 | 0,704 | 6,40 | 3,99 | 2,33 |
|                                         | BEČ 7     | 14.9.2010  | 1,415 | 0,707 | 6,42 | 2,69 | 2,57 |
|                                         | BEČ 8     | 14.9.2010  | 1,688 | 0,592 | 5,39 | 4,87 | 2,85 |
|                                         | BEČ 9     | 14.9.2010  | 1,627 | 0,615 | 5,59 | 3,49 | 2,40 |
|                                         | BEČ 10    | 14.9.2010  | 1,632 | 0,613 | 5,57 | 3,87 | 2,91 |
|                                         | BEČ 11    | 14.9.2010  | 1,631 | 0,613 | 5,57 | 4,96 | 3,54 |
|                                         | BEČ 12    | 14.9.2010  | 1,618 | 0,618 | 5,62 | 3,76 | 2,90 |
|                                         | BEČ 13    | 14.9.2010  | 1,654 | 0,605 | 5,50 | 3,64 | 2,90 |
|                                         | BUC 01+P  | 10.9.2010  | 1,244 | 0,804 | 7,31 | 4,80 | 4,13 |
|                                         | BUC 02    | 10.9.2010  | 1,292 | 0,774 | 7,04 | 3,85 | 2,66 |

|                           |            |            |       |       |      |      |      |
|---------------------------|------------|------------|-------|-------|------|------|------|
| CZ, Šumava, Bučina        | BUC 03     | 10.9.2010  | 1,299 | 0,770 | 7,00 | 3,63 | 3,40 |
|                           | BUC 04     | 10.9.2010  | 1,266 | 0,790 | 7,18 | 3,39 | 3,59 |
|                           | BUC 05     | 10.9.2010  | 1,272 | 0,786 | 7,15 | 3,57 | 3,68 |
|                           | BUC 06     | 10.9.2010  | 1,257 | 0,796 | 7,23 | 3,49 | 3,23 |
|                           | BUC 07     | 10.9.2010  | 1,294 | 0,773 | 7,02 | 2,89 | 3,01 |
|                           | BUC 08     | 10.9.2010  | 1,305 | 0,766 | 6,97 | 2,18 | 3,72 |
|                           | BUC 09     | 10.9.2010  | 1,315 | 0,760 | 6,91 | 2,43 | 2,73 |
|                           | BUC 1      | 18.10.2011 | 1,357 | 0,737 | 6,70 | 2,64 | 1,29 |
|                           | BUC 2      | 18.10.2011 | 1,296 | 0,772 | 7,01 | 2,56 | 1,64 |
|                           | BUC 3      | 18.10.2011 | 1,242 | 0,805 | 7,32 | 2,49 | 2,25 |
|                           | BUC 4      | 18.10.2011 | 1,273 | 0,786 | 7,14 | 2,54 | 2,15 |
|                           | BUC 5      | 18.10.2011 | 1,413 | 0,708 | 6,43 | 3,03 | 2,59 |
|                           | BUC 6      | 18.10.2011 | 1,247 | 0,802 | 7,29 | 2,76 | 2,43 |
|                           | BUC 7      | 18.10.2011 | 1,382 | 0,724 | 6,58 | 2,38 | 2,27 |
| CZ, Šumava, Český Rudolec | CRU 01     | 22.6.2010  | 1,640 | 0,610 | 5,54 | 3,70 | 2,01 |
|                           | CRU 02     | 22.6.2010  | 1,648 | 0,607 | 5,52 | 4,54 | 1,98 |
|                           | CRU 03     | 22.6.2010  | 1,631 | 0,613 | 5,57 | 5,78 | 2,35 |
|                           | CRU 04     | 22.6.2010  | 1,662 | 0,602 | 5,47 | 3,80 | 2,37 |
|                           | CRU 05     | 22.6.2010  | 1,620 | 0,617 | 5,61 | 4,90 | 2,47 |
|                           | CRU 06     | 22.6.2010  | 1,598 | 0,626 | 5,69 | 5,22 | 2,80 |
| CZ, Šumava, Hůrka         | HUR 01+P   | 9.9.2010   | 1,266 | 0,790 | 7,18 | 3,99 | 3,54 |
|                           | HUR 02     | 9.9.2010   | 1,326 | 0,754 | 6,86 | 4,55 | 3,46 |
|                           | HUR 03     | 9.9.2010   | 1,239 | 0,807 | 7,34 | 5,06 | 4,08 |
|                           | CBS 01A    | 9.7.2010   | 1,384 | 0,723 | 6,57 | 3,55 | 2,17 |
|                           | CBS 01B    | 9.7.2010   | 1,431 | 0,699 | 6,35 | 2,61 | 2,96 |
|                           | CBS 02     | 9.7.2010   | 1,253 | 0,798 | 7,25 | 2,66 | 2,42 |
|                           | CBS 03     | 9.7.2010   | 1,254 | 0,797 | 7,25 | 2,58 | 1,74 |
|                           | CBS 04     | 9.7.2010   | 1,399 | 0,715 | 6,50 | 2,63 | 1,97 |
|                           | CBS 05     | 9.7.2010   | 1,657 | 0,604 | 5,49 | 2,75 | 1,98 |
|                           | CBS 06     | 9.7.2010   | 1,651 | 0,606 | 5,51 | 3,39 | 2,26 |
|                           | CBS 07     | 9.7.2010   | 1,437 | 0,696 | 6,33 | 2,47 | 2,01 |
|                           | CBS 08     | 9.7.2010   | 1,264 | 0,791 | 7,19 | 2,36 | 2,31 |
|                           | CBS 09     | 9.7.2010   | 1,254 | 0,797 | 7,25 | 2,86 | 1,95 |
|                           | CBS 10     | 9.7.2010   | 1,635 | 0,612 | 5,56 | 3,06 | 2,06 |
|                           | ZAD 2-1    | 18.10.2011 | 1,411 | 0,709 | 6,44 | 2,42 | 2,04 |
|                           |            | 24.10.2011 | 1,441 | 0,694 | 6,31 | 2,52 | 2,31 |
|                           |            | 2.11.2011  | 1,422 | 0,703 | 6,39 | 2,55 | 1,60 |
|                           | ZAD 2-2    | 24.10.2011 | 1,455 | 0,687 | 6,25 | 2,21 | 1,86 |
|                           |            | 31.10.2011 | 1,435 | 0,697 | 6,33 | 2,12 | 2,10 |
|                           |            | 2.11.2011  | 1,455 | 0,687 | 6,25 | 2,78 | 2,17 |
|                           | ZAD 2-3    | 18.10.2011 | 1,259 | 0,794 | 7,22 | 2,38 | 2,15 |
|                           |            | 31.10.2011 | 1,256 | 0,796 | 7,24 | 2,26 | 2,11 |
|                           |            | 2.11.2011  | 1,279 | 0,782 | 7,11 | 2,81 | 2,99 |
|                           | ZAD 2-4    | 18.10.2011 | 1,388 | 0,720 | 6,55 | 2,36 | 2,06 |
|                           |            | 31.10.2011 | 1,418 | 0,705 | 6,41 | 2,68 | 2,73 |
|                           |            | 2.11.2011  | 1,403 | 0,713 | 6,48 | 2,93 | 2,85 |
|                           | ZAD 2-5    | 18.10.2011 | 1,429 | 0,700 | 6,36 | 2,89 | 2,72 |
|                           | 24.10.2011 | 1,435      | 0,697 | 6,33  | 2,27 | 1,94 |      |
|                           | 2.11.2011  | 1,430      | 0,699 | 6,36  | 2,74 | 2,23 |      |
| ZAD 2-6                   | 18.10.2011 | 1,573      | 0,636 | 5,78  | 1,66 | 2,16 |      |

|                      |           |            |       |       |      |      |      |
|----------------------|-----------|------------|-------|-------|------|------|------|
| CZ, Šumava, Churáňov |           | 31.10.2011 | 1,645 | 0,608 | 5,53 | 2,71 | 2,03 |
|                      |           | 2.11.2011  | 1,595 | 0,627 | 5,70 | 2,83 | 2,42 |
|                      | ZAD 2-7   | 18.10.2011 | 1,294 | 0,773 | 7,02 | 1,81 | 2,31 |
|                      |           | 31.10.2011 | 1,270 | 0,787 | 7,16 | 2,47 | 2,36 |
|                      |           | 2.11.2011  | 1,271 | 0,787 | 7,15 | 2,44 | 2,43 |
|                      | ZAD 2-8   | 18.10.2011 | 1,681 | 0,595 | 5,41 | 2,27 | 2,22 |
|                      |           | 31.10.2011 | 1,661 | 0,602 | 5,47 | 2,93 | 2,28 |
|                      |           | 2.11.2011  | 1,671 | 0,598 | 5,44 | 2,84 | 2,09 |
|                      | ZAD 2-9   | 18.10.2011 | 1,425 | 0,702 | 6,38 | 2,08 | 1,97 |
|                      |           | 31.10.2011 | 1,400 | 0,714 | 6,49 | 2,41 | 2,33 |
|                      |           | 2.11.2011  | 1,486 | 0,673 | 6,12 | 2,78 | 2,00 |
|                      | ZAD 2-10  | 18.10.2011 | 1,449 | 0,690 | 6,27 | 1,94 | 1,92 |
|                      |           | 31.10.2011 | 1,423 | 0,703 | 6,39 | 2,55 | 2,79 |
|                      |           | 2.11.2011  | 1,478 | 0,677 | 6,15 | 2,62 | 2,22 |
|                      | ZAD 2-11  | 18.10.2011 | 1,573 | 0,636 | 5,78 | 3,32 | 2,85 |
|                      |           | 31.10.2011 | 1,626 | 0,615 | 5,59 | 2,72 | 2,43 |
|                      |           | 2.11.2011  | 1,627 | 0,615 | 5,59 | 3,32 | 2,70 |
|                      | ZAD 2-12  | 18.10.2011 | 1,437 | 0,696 | 6,33 | 2,00 | 1,99 |
|                      |           | 24.10.2011 | 1,428 | 0,700 | 6,37 | 2,58 | 1,97 |
|                      |           | 31.10.2011 | 1,424 | 0,702 | 6,38 | 2,26 | 2,25 |
|                      | ZAD 2-13  | 1.11.2011  | 1,206 | 0,829 | 7,54 | 3,00 | 2,77 |
|                      |           | 2.11.2011  | 1,232 | 0,812 | 7,38 | 2,97 | 2,24 |
|                      |           | 3.11.2011  | 1,248 | 0,801 | 7,28 | 2,29 | 1,68 |
|                      | ZAD 2-14  | 1.11.2011  | 1,220 | 0,820 | 7,45 | 2,39 | 1,86 |
|                      |           | 2.11.2011  | 1,232 | 0,812 | 7,38 | 2,97 | 2,24 |
|                      |           | 3.11.2011  | 1,231 | 0,812 | 7,38 | 2,70 | 1,77 |
|                      | ZAD 2-15  | 1.11.2011  | 1,407 | 0,711 | 6,46 | 2,85 | 2,14 |
|                      |           | 2.11.2011  | 1,403 | 0,713 | 6,48 | 2,56 | 2,90 |
|                      |           | 3.11.2011  | 1,415 | 0,707 | 6,42 | 2,89 | 1,86 |
|                      | ZAD 2-16  | 1.11.2011  | 1,429 | 0,700 | 6,36 | 2,90 | 2,26 |
|                      |           | 2.11.2011  | 1,429 | 0,700 | 6,36 | 2,90 | 2,26 |
|                      |           | 3.11.2011  | 1,393 | 0,718 | 6,53 | 2,98 | 2,65 |
|                      | ZAD 2-17  | 1.11.2011  | 1,381 | 0,724 | 6,58 | 3,06 | 2,22 |
|                      |           | 2.11.2011  | 1,388 | 0,720 | 6,55 | 2,56 | 2,21 |
|                      |           | 3.11.2011  | 1,383 | 0,723 | 6,57 | 2,87 | 1,97 |
|                      | ZAD 2-18  | 1.11.2011  | 1,613 | 0,620 | 5,64 | 3,31 | 2,81 |
|                      | 2.11.2011 | 1,653      | 0,605 | 5,50  | 2,99 | 2,22 |      |
|                      | 3.11.2011 | 1,553      | 0,644 | 5,85  | 3,84 | 2,50 |      |
| ZAD 2-19             | 1.11.2011 | 1,241      | 0,806 | 7,32  | 2,71 | 2,04 |      |
|                      | 2.11.2011 | 1,262      | 0,792 | 7,20  | 2,56 | 2,32 |      |
|                      | 3.11.2011 | 1,192      | 0,839 | 7,63  | 2,98 | 2,56 |      |
|                      | KLA 01+P  | 8.7.2010   | 1,607 | 0,622 | 5,66 | 3,72 | 2,70 |
|                      | KLA 02    | 8.7.2010   | 1,629 | 0,614 | 5,58 | 3,75 | 2,69 |
|                      | KLA 03    | 8.7.2010   | 1,631 | 0,613 | 5,57 | 3,60 | 2,48 |
|                      | KLA 04    | 8.7.2010   | 1,605 | 0,623 | 5,66 | 3,42 | 2,50 |
|                      | KLA 05    | 8.7.2010   | 1,603 | 0,624 | 5,67 | 3,23 | 2,54 |
|                      | KLA 06    | 8.7.2010   | 1,604 | 0,623 | 5,67 | 2,98 | 2,47 |
|                      | KLA 07    | 9.7.2010   | 1,645 | 0,608 | 5,53 | 3,19 | 1,93 |
|                      | KLA 08    | 9.7.2010   | 1,602 | 0,624 | 5,67 | 3,86 | 3,70 |
|                      | KLA 09    | 9.7.2010   | 1,590 | 0,629 | 5,72 | 3,10 | 2,87 |

|                           |            |            |       |       |      |      |      |
|---------------------------|------------|------------|-------|-------|------|------|------|
| CZ, Šumava, Klášterec     | KLA 10     | 9.7.2010   | 1,624 | 0,616 | 5,60 | 3,18 | 2,50 |
|                           | KLA 1      | 18.10.2011 | 1,650 | 0,606 | 5,51 | 2,78 | 1,86 |
|                           |            | 31.10.2011 | 1,611 | 0,621 | 5,64 | 2,55 | 2,09 |
|                           |            | 2.11.2011  | 1,650 | 0,606 | 5,51 | 3,06 | 2,59 |
|                           | KLA 2      | 18.10.2011 | 1,603 | 0,624 | 5,67 | 3,27 | 2,16 |
|                           |            | 31.10.2011 | 1,602 | 0,624 | 5,67 | 2,94 | 2,98 |
|                           |            | 2.11.2011  | 1,624 | 0,616 | 5,60 | 2,73 | 2,38 |
|                           | KLA 3      | 18.10.2011 | 1,641 | 0,609 | 5,54 | 2,85 | 2,31 |
|                           |            | 31.10.2011 | 1,611 | 0,621 | 5,64 | 3,13 | 3,02 |
|                           |            | 2.11.2011  | 1,648 | 0,607 | 5,52 | 2,54 | 2,79 |
|                           | KLA 4      | 24.10.2011 | 1,621 | 0,617 | 5,61 | 2,08 | 2,21 |
|                           |            | 31.10.2011 | 1,618 | 0,618 | 5,62 | 2,41 | 2,82 |
|                           |            | 2.11.2011  | 1,643 | 0,609 | 5,53 | 2,92 | 2,62 |
| KLA 5                     | 24.10.2011 | 1,626      | 0,615 | 5,59  | 2,42 | 2,03 |      |
|                           | 31.10.2011 | 1,672      | 0,598 | 5,44  | 3,04 | 2,65 |      |
|                           | 2.11.2011  | 1,653      | 0,605 | 5,50  | 3,42 | 3,46 |      |
| CZ, Šumava, Knížecí pláně | KNI 01+P   | 9.7.2010   | 1,427 | 0,701 | 6,37 | 2,88 | 2,18 |
|                           | KNI 02     | 9.7.2010   | 1,264 | 0,791 | 7,19 | 3,00 | 2,56 |
|                           | KNI 03     | 9.7.2010   | 1,712 | 0,584 | 5,31 | 3,24 | 2,38 |
|                           | KNI 04     | 9.7.2010   | 1,802 | 0,555 | 5,04 | 3,11 | 2,28 |
|                           | KNI 05     | 9.7.2010   | 1,813 | 0,552 | 5,01 | 3,10 | 2,49 |
|                           | KNI 06     | 9.7.2010   | 1,809 | 0,553 | 5,02 | 3,56 | 2,92 |
|                           | KNI 07     | 9.7.2010   | 1,264 | 0,791 | 7,19 | 2,29 | 2,26 |
|                           | KNI 08     | 9.7.2010   | 1,254 | 0,797 | 7,25 | 2,39 | 2,07 |
|                           | KNI 09     | 9.7.2010   | 1,231 | 0,812 | 7,38 | 2,52 | 2,26 |
|                           | KNI 10     | 9.7.2010   | 1,241 | 0,806 | 7,32 | 2,40 | 2,14 |
| CZ, Šumava, Ktiš          | KTI 01+P   | 12.7.2010  | 1,686 | 0,593 | 5,39 | 3,02 | 2,93 |
|                           | KTI 02     | 12.7.2010  | 1,688 | 0,592 | 5,39 | 5,21 | 3,73 |
|                           | KTI 03     | 12.7.2010  | 1,720 | 0,581 | 5,28 | 4,75 | 3,73 |
| CZ, Šumava, Kubova huť    | KUB 01     | 1.6.2010   | 1,858 | 0,538 | 4,89 | 3,19 | 2,49 |
|                           | KUB 02     | 2.6.2010   | 1,762 | 0,568 | 5,16 | 3,99 | 3,29 |
|                           | KUB 03     | 2.6.2010   | 1,265 | 0,791 | 7,19 | 4,09 | 3,01 |
|                           | KUB 04     | 2.6.2010   | 1,240 | 0,806 | 7,33 | 4,79 | 4,18 |
|                           | KUB 05     | 2.6.2010   | 1,416 | 0,706 | 6,42 | 5,10 | 3,51 |
|                           | KUB 06     | 1.6.2010   | 1,270 | 0,787 | 7,16 | 3,21 | 2,65 |
|                           | KUB 07     | 2.6.2010   | 1,427 | 0,701 | 6,37 | 3,83 | 3,31 |
|                           | KUB 08/1   | 2.6.2010   | 1,698 | 0,589 | 5,35 | 3,81 | 2,80 |
|                           | KUB 08/2   | 2.6.2010   | 1,840 | 0,543 | 4,94 | 3,61 | 2,89 |
|                           | KUB 08/3   | 1.6.2010   | 1,684 | 0,594 | 5,40 | 2,59 | 2,04 |
|                           | KUB 09     | 1.6.2010   | 1,659 | 0,603 | 5,48 | 3,46 | 2,60 |
|                           | KUB 10     | 1.6.2010   | 1,274 | 0,785 | 7,14 | 2,77 | 2,42 |
|                           | KUB 11     | 12.7.2010  | 1,257 | 0,796 | 7,23 | 1,70 | 2,51 |
|                           | KUB 12     | 12.7.2010  | 1,250 | 0,800 | 7,27 | 2,00 | 2,71 |
|                           | KUB 13     | 12.7.2010  | 1,435 | 0,697 | 6,33 | 3,27 | 2,19 |
|                           | KUB 14a    | 12.7.2010  | 1,443 | 0,693 | 6,30 | 2,87 | 3,12 |
| KUB 14b                   | 12.7.2010  | 1,446      | 0,692 | 6,29  | 2,28 | 2,65 |      |
| KUB15+P20                 | 12.7.2010  | 1,717      | 0,582 | 5,29  | 2,71 | 2,11 |      |
| KUB16                     | 12.7.2010  | 1,415      | 0,707 | 6,42  | 2,88 | 2,22 |      |
|                           | OLS 01+P   | 13.9.2010  | 1,242 | 0,805 | 7,32 | 2,82 | 2,84 |
|                           | OLS 02     | 13.9.2010  | 1,230 | 0,813 | 7,39 | 2,67 | 2,70 |



|                              |                            |            |           |       |       |      |      |      |
|------------------------------|----------------------------|------------|-----------|-------|-------|------|------|------|
| CZ, Šumava, Kvilda - Olšinka | OLS 03                     | 13.9.2010  | 1,262     | 0,792 | 7,20  | 2,87 | 2,90 |      |
|                              | OLS 04                     | 13.9.2010  | 1,328     | 0,753 | 6,84  | 2,74 | 2,20 |      |
|                              | OLS 05                     | 13.9.2010  | 1,242     | 0,805 | 7,32  | 2,09 | 2,94 |      |
|                              | OLS 06                     | 13.9.2010  | 1,248     | 0,801 | 7,28  | 2,46 | 1,96 |      |
|                              | OLS 07                     | 13.9.2010  | 1,278     | 0,782 | 7,11  | 2,40 | 2,75 |      |
|                              | OLS 08                     | 13.9.2010  | 1,254     | 0,797 | 7,25  | 2,46 | 2,83 |      |
|                              | OLS 09                     | 13.9.2010  | 1,254     | 0,797 | 7,25  | 2,66 | 3,25 |      |
|                              | OLS 10                     | 13.9.2010  | 1,244     | 0,804 | 7,31  | 2,75 | 2,69 |      |
|                              | OLS 11                     | 13.9.2010  | 1,433     | 0,698 | 6,34  | 2,70 | 2,82 |      |
|                              | OLS 12                     | 13.9.2010  | 1,412     | 0,708 | 6,44  | 3,47 | 3,33 |      |
|                              | OLS 13                     | 14.9.2010  | 1,424     | 0,702 | 6,38  | 2,45 | 2,33 |      |
|                              | OLS 14                     | 14.9.2010  | 1,242     | 0,805 | 7,32  | 2,17 | 2,82 |      |
|                              | OLS 15                     | 14.9.2010  | 1,226     | 0,816 | 7,41  | 2,10 | 2,65 |      |
|                              | OLS 16                     | 14.9.2010  | 1,236     | 0,809 | 7,35  | 2,34 | 2,93 |      |
|                              | OLS 17                     | 14.9.2010  | 1,228     | 0,814 | 7,40  | 2,23 | 3,01 |      |
|                              | OLS 18                     | 14.9.2010  | 1,237     | 0,808 | 7,35  | 2,55 | 3,02 |      |
|                              | OLS 19                     | 14.9.2010  | 1,230     | 0,813 | 7,39  | 2,61 | 2,71 |      |
|                              | CZ, Šumava, Kvilda, Tetřev | TET 01+P   | 9.9.2010  | 1,235 | 0,810 | 7,36 | 2,36 | 2,91 |
|                              |                            | TET 01     | 4.11.2010 | 1,267 | 0,789 | 7,17 | 2,42 | 2,50 |
| TET 01                       |                            | 3.3.2011   | 1,266     | 0,790 | 7,18  | 1,82 | 1,68 |      |
| TET 02                       |                            | 9.9.2010   | 1,257     | 0,796 | 7,23  | 3,16 | 1,62 |      |
| TET 03                       |                            | 9.9.2010   | 1,255     | 0,797 | 7,24  | 3,45 | 2,90 |      |
| TET 04                       |                            | 9.9.2010   | 1,247     | 0,802 | 7,29  | 3,43 | 3,26 |      |
| KVIL                         |                            | 18.10.2011 | 1,211     | 0,826 | 7,51  | 2,09 | 2,70 |      |
|                              | 26.10.2011                 | 1,234      | 0,810     | 7,37  | 2,78  | 2,24 |      |      |
|                              | 31.10.2011                 | 1,214      | 0,824     | 7,49  | 3,01  | 2,32 |      |      |
| CZ, Šumava, Laka lake        | LAK 01+P                   | 10.9.2010  | 1,265     | 0,791 | 7,19  | 3,19 | 2,64 |      |
|                              | LAK 02                     | 10.9.2010  | 1,249     | 0,801 | 7,28  | 3,05 | 2,66 |      |
|                              | LAK 03                     | 10.9.2010  | 1,318     | 0,759 | 6,90  | 3,98 | 2,85 |      |
|                              | LAK 04                     | 10.9.2010  | 1,427     | 0,701 | 6,37  | 3,81 | 3,21 |      |
|                              | LAK 05                     | 10.9.2010  | 1,429     | 0,700 | 6,36  | 3,13 | 2,81 |      |
|                              | LAK 06                     | 10.9.2010  | 1,282     | 0,780 | 7,09  | 3,04 | 3,45 |      |
| CZ, Šumava, Nové Hutě        | PRIL 01+P                  | 12.7.2010  | 1,261     | 0,793 | 7,21  | 2,86 | 2,45 |      |
|                              | PRIL 02                    | 12.7.2010  | 1,262     | 0,792 | 7,20  | 3,35 | 2,05 |      |
|                              | PRIL 03                    | 12.7.2010  | 1,670     | 0,599 | 5,44  | 2,90 | 3,22 |      |
|                              | PRIL 04                    | 12.7.2010  | 1,254     | 0,797 | 7,25  | 3,27 | 2,68 |      |
|                              | PRIL 05                    | 12.7.2010  | 1,250     | 0,800 | 7,27  | 3,08 | 2,80 |      |
|                              | PRIL 06                    | 12.7.2010  | 1,459     | 0,685 | 6,23  | 3,44 | 2,46 |      |
|                              | PRIL 07                    | 12.7.2010  | 1,619     | 0,618 | 5,61  | 3,32 | 3,91 |      |
|                              | PRIL 1                     | 18.10.2011 | 1,251     | 0,799 | 7,27  | 2,69 | 2,60 |      |
|                              |                            | 24.10.2011 | 1,271     | 0,787 | 7,15  | 2,66 | 2,03 |      |
|                              |                            | 1.11.2011  | 1,255     | 0,797 | 7,24  | 2,97 | 2,47 |      |
|                              | PRIL 2                     | 18.10.2011 | 1,643     | 0,609 | 5,53  | 2,15 | 2,42 |      |
|                              |                            | 24.10.2011 | 1,650     | 0,606 | 5,51  | 2,75 | 2,04 |      |
|                              |                            | 1.11.2011  | 1,629     | 0,614 | 5,58  | 3,09 | 2,76 |      |
|                              | PRIL 3                     | 18.10.2011 | 1,647     | 0,607 | 5,52  | 2,90 | 2,59 |      |
|                              |                            | 24.10.2011 | 1,649     | 0,606 | 5,51  | 2,96 | 2,03 |      |
|                              |                            | 31.10.2011 | 1,638     | 0,611 | 5,55  | 2,71 | 1,93 |      |
|                              | PRIL 4                     | 18.10.2011 | 1,643     | 0,609 | 5,53  | 2,61 | 2,00 |      |
|                              | 31.10.2011                 | 1,638      | 0,611     | 5,55  | 2,85  | 2,52 |      |      |

|                              |              |            |       |       |      |      |      |
|------------------------------|--------------|------------|-------|-------|------|------|------|
|                              |              | 2.11.2011  | 1,622 | 0,617 | 5,60 | 2,70 | 2,59 |
|                              | PRIL 5       | 1.11.2011  | 1,230 | 0,813 | 7,39 | 2,10 | 2,77 |
|                              |              | 2.11.2011  | 1,259 | 0,794 | 7,22 | 2,71 | 2,21 |
|                              |              | 3.11.2011  | 1,240 | 0,806 | 7,33 | 2,32 | 2,17 |
|                              | PRIL 6       | 1.11.2011  | 1,608 | 0,622 | 5,65 | 3,06 | 2,35 |
|                              |              | 2.11.2011  | 1,680 | 0,595 | 5,41 | 2,41 | 2,21 |
|                              |              | 3.11.2011  | 1,664 | 0,601 | 5,46 | 2,72 | 1,88 |
| CZ, Šumava, Ostrá hora       | OST 01+P     | 9.7.2010   | 1,713 | 0,584 | 5,31 | 2,54 | 1,82 |
|                              | OST 02       | 9.7.2010   | 1,721 | 0,581 | 5,28 | 2,73 | 1,91 |
|                              | OST 03       | 9.7.2010   | 1,722 | 0,581 | 5,28 | 2,54 | 2,12 |
|                              | OST 04       | 9.7.2010   | 1,710 | 0,585 | 5,32 | 3,02 | 1,83 |
|                              | OST 05       | 9.7.2010   | 1,716 | 0,583 | 5,30 | 3,08 | 1,94 |
|                              | OST 06       | 9.7.2010   | 1,747 | 0,572 | 5,20 | 2,50 | 1,97 |
| CZ, Šumava, Vltava's springs | VLT 01+P     | 10.9.2010  | 1,265 | 0,791 | 7,19 | 2,53 | 2,66 |
|                              | VLT 02       | 10.9.2010  | 1,271 | 0,787 | 7,15 | 3,32 | 3,30 |
|                              | VLT 03       | 10.9.2010  | 1,234 | 0,810 | 7,37 | 3,04 | 3,20 |
|                              | VLT 04       | 10.9.2010  | 1,417 | 0,706 | 6,41 | 2,85 | 3,13 |
|                              | VLT 05       | 10.9.2010  | 1,263 | 0,792 | 7,20 | 3,69 | 3,11 |
|                              | VLT 06       | 10.9.2010  | 1,441 | 0,694 | 6,31 | 3,69 | 3,45 |
|                              | VLT 07       | 10.9.2010  | 1,539 | 0,650 | 5,91 | 4,87 | 3,48 |
|                              | VLT 07       | 4.11.2010  | 1,583 | 0,632 | 5,74 | 3,86 | 2,40 |
|                              | VLT 07_2     | 3.3.2011   | 1,581 | 0,633 | 5,75 | 4,62 | 2,11 |
| VLT 08                       | 10.9.2010    | 1,441      | 0,694 | 6,31  | 4,03 | 2,91 |      |
| CZ, Šumava, Příslop          | PRI 01+P     | 9.7.2010   | 1,646 | 0,608 | 5,52 | 2,57 | 1,81 |
|                              | PRI 02       | 9.7.2010   | 1,625 | 0,615 | 5,59 | 2,85 | 2,09 |
|                              | PRI 03       | 9.7.2010   | 1,634 | 0,612 | 5,56 | 3,16 | 2,10 |
|                              | PRI 04 (1.p) | 9.7.2010   | 1,661 | 0,602 | 5,47 | 2,89 | 1,90 |
|                              | PRI 05       | 9.7.2010   | 1,665 | 0,601 | 5,46 | 2,79 | 1,98 |
| CZ, Šumava, Srní             | SRN 01+P     | 9.9.2010   | 1,495 | 0,669 | 6,08 | 4,18 | 3,31 |
|                              | SRN 01       | 4.11.2010  | 1,526 | 0,655 | 5,96 | 3,56 | 2,30 |
|                              | SRN 01       | 3.3.2011   | 1,521 | 0,657 | 5,98 | 2,63 | 1,39 |
|                              | SRN 02       | 9.9.2010   | 1,495 | 0,669 | 6,08 | 4,13 | 3,66 |
|                              | SRN          | 24.10.2011 | 1,491 | 0,671 | 6,10 | 2,67 | 2,04 |
|                              |              | 26.10.2011 | 1,470 | 0,680 | 6,18 | 2,01 | 2,51 |
|                              |              | 31.10.2011 | 1,495 | 0,669 | 6,08 | 2,94 | 2,17 |
| CZ, Šumava, Stachy           | STA 1        | 8.9.2011   | 1,420 | 0,704 | 6,40 | 2,12 | 1,58 |
|                              | STA 2        | 8.9.2011   | 1,401 | 0,714 | 6,49 | 2,86 | 1,44 |
|                              | Š1+P         | 22.10.2009 | 1,282 | 0,780 | 7,09 | 2,75 | 2,31 |
|                              | Š2+P         | 22.10.2009 | 1,426 | 0,701 | 6,37 | 2,75 | 1,91 |
|                              | Š3+P         | 22.10.2009 | 1,261 | 0,793 | 7,21 | 2,31 | 2,18 |
|                              | Š4+P         | 22.10.2009 | 1,246 | 0,803 | 7,30 | 2,49 | 2,21 |
|                              | Š5+P         | 22.10.2009 | 1,265 | 0,791 | 7,19 | 2,93 | 2,47 |
|                              | Š6+P         | 22.10.2009 | 1,243 | 0,805 | 7,31 | 2,65 | 2,56 |
|                              | Š7+P         | 22.10.2009 | 1,434 | 0,697 | 6,34 | 3,10 | 1,82 |
|                              | Š8+P         | 22.10.2009 | 1,317 | 0,759 | 6,90 | 3,11 | 2,35 |
|                              | Š9+P         | 22.10.2009 | 1,240 | 0,806 | 7,33 | 2,66 | 2,68 |
|                              | Š10+P        | 22.10.2009 | 1,249 | 0,801 | 7,28 | 2,60 | 2,09 |
|                              | Š11+P        | 22.10.2009 | 1,249 | 0,801 | 7,28 | 2,37 | 2,09 |
|                              | 2Š1+P        | 22.10.2009 | 1,792 | 0,558 | 5,07 | 2,38 | 2,12 |
|                              | 2Š2+P        | 22.10.2009 | 1,277 | 0,783 | 7,12 | 2,98 | 2,14 |

|                                 |          |            |       |       |      |      |      |
|---------------------------------|----------|------------|-------|-------|------|------|------|
| CZ, Šumava, Špičák hill         | 2Š3+P    | 22.10.2009 | 1,774 | 0,564 | 5,12 | 2,83 | 2,08 |
|                                 | 2Š4+P    | 22.10.2009 | 1,248 | 0,801 | 7,28 | 2,42 | 1,76 |
|                                 | 2Š5+P    | 22.10.2009 | 1,274 | 0,785 | 7,14 | 2,91 | 2,53 |
|                                 | 2Š6+P    | 22.10.2009 | 1,259 | 0,794 | 7,22 | 2,94 | 2,10 |
|                                 | 2Š7+P    | 22.10.2009 | 1,282 | 0,780 | 7,09 | 2,50 | 2,15 |
|                                 | 2Š8+P    | 22.10.2009 | 1,438 | 0,695 | 6,32 | 2,51 | 2,17 |
|                                 | 2Š9+P    | 22.10.2009 | 1,271 | 0,787 | 7,15 | 2,56 | 2,59 |
|                                 | 2Š10+P   | 22.10.2009 | 1,270 | 0,787 | 7,16 | 2,87 | 2,24 |
|                                 | 2Š11+P   | 22.10.2009 | 1,244 | 0,804 | 7,31 | 2,62 | 2,17 |
|                                 | 2Š11+P   | 23.10.2009 | 1,242 | 0,805 | 7,32 | 2,51 | 2,14 |
|                                 | 2Š12+P   | 23.10.2009 | 1,226 | 0,816 | 7,41 | 2,85 | 2,21 |
|                                 | 2Š13+P   | 23.10.2009 | 1,237 | 0,808 | 7,35 | 2,98 | 1,86 |
|                                 | 2Š14+P   | 23.10.2009 | 1,219 | 0,820 | 7,46 | 2,85 | 2,60 |
|                                 | 2Š15+P   | 23.10.2009 | 1,242 | 0,805 | 7,32 | 2,51 | 2,14 |
| CZ, Šumava, Včelná pod Boubínem | VCE 01+P | 9.7.2010   | 1,616 | 0,619 | 5,63 | 2,77 | 2,24 |
|                                 | VCE 02   | 9.7.2010   | 1,642 | 0,609 | 5,54 | 2,66 | 1,92 |
|                                 | VCE 03   | 9.7.2010   | 1,421 | 0,704 | 6,40 | 2,78 | 2,16 |
|                                 | VCE 04   | 12.7.2010  | 1,432 | 0,698 | 6,35 | 1,84 | 2,81 |
|                                 | VCE 1    | 18.10.2011 | 1,551 | 0,645 | 5,86 | 2,80 | 2,39 |
|                                 |          | 31.10.2011 | 1,624 | 0,616 | 5,60 | 3,02 | 2,93 |
|                                 |          | 1.11.2011  | 1,604 | 0,623 | 5,67 | 2,60 | 2,22 |
|                                 | VCE 2    | 24.10.2011 | 1,466 | 0,682 | 6,20 | 2,40 | 2,02 |
|                                 |          | 31.10.2011 | 1,454 | 0,688 | 6,25 | 2,55 | 1,60 |
| 1.11.2011                       | 1,453    | 0,688      | 6,26  | 2,56  | 2,18 |      |      |
| CZ, Šumava, Vysočina - Čeřínek  | CER 01+P | 10.9.2010  | 1,695 | 0,590 | 5,36 | 3,14 | 2,11 |
|                                 | CER 02   | 10.9.2010  | 1,686 | 0,593 | 5,39 | 3,71 | 2,60 |
|                                 | CER 03   | 10.9.2010  | 1,638 | 0,611 | 5,55 | 4,07 | 2,34 |
|                                 | CER 04   | 10.9.2010  | 1,748 | 0,572 | 5,20 | 4,29 | 2,07 |
|                                 | CER 04   | 4.11.2010  | 1,760 | 0,568 | 5,16 | 2,92 | 1,78 |
|                                 | CER 04   | 3.3.2011   | 1,685 | 0,593 | 5,39 | 3,87 | 1,81 |
|                                 | CER 05   | 3.3.2011   | 1,312 | 0,762 | 6,93 | 3,97 | 1,69 |
|                                 | CER 05   | 4.11.2010  | 1,437 | 0,696 | 6,33 | 2,98 | 2,42 |
|                                 | CER 05   | 3.3.2011   | 1,312 | 0,762 | 6,93 | 3,97 | 1,69 |
| CZ, Šumava, Zadov               | Z1+P     | 23.10.2009 | 1,224 | 0,817 | 7,43 | 2,48 | 2,24 |
|                                 | Z2+P     | 23.10.2009 | 1,243 | 0,805 | 7,31 | 1,87 | 2,79 |
|                                 | Z3+P     | 23.10.2009 | 1,212 | 0,825 | 7,50 | 2,30 | 2,18 |
|                                 | Z4+P     | 23.10.2009 | 1,244 | 0,804 | 7,31 | 2,56 | 1,98 |
|                                 | Z5+P     | 23.10.2009 | 1,230 | 0,813 | 7,39 | 2,74 | 1,89 |
|                                 | Z6+P     | 23.10.2009 | 1,222 | 0,818 | 7,44 | 2,47 | 2,04 |
|                                 | ZAD 1    | 24.10.2011 | 1,280 | 0,781 | 7,10 | 2,76 | 2,14 |
|                                 |          | 31.10.2011 | 1,253 | 0,798 | 7,25 | 2,40 | 2,05 |
| 2.11.2011                       | 1,255    | 0,797      | 7,24  | 2,96  | 2,87 |      |      |
| CZ, Šumava, Zadov               | CPL 01+P | 12.7.2010  | 1,269 | 0,788 | 7,16 | 1,87 | 2,04 |
|                                 | CPL 02   | 12.7.2010  | 1,262 | 0,792 | 7,20 | 2,78 | 2,67 |
|                                 | CPL 03   | 12.7.2010  | 1,270 | 0,787 | 7,16 | 2,18 | 2,34 |
|                                 | CPL 04   | 12.7.2010  | 1,276 | 0,784 | 7,12 | 3,43 | 2,33 |
|                                 | CPL 05   | 12.7.2010  | 1,261 | 0,793 | 7,21 | 3,12 | 2,27 |
|                                 | CPL 06   | 12.7.2010  | 1,260 | 0,794 | 7,21 | 2,57 | 2,11 |
|                                 | ZMU 01+P | 12.7.2010  | 1,254 | 0,797 | 7,25 | 3,20 | 2,47 |
|                                 | ZMU 02   | 12.7.2010  | 1,264 | 0,791 | 7,19 | 3,29 | 2,11 |

|                              |          |            |       |       |      |      |      |
|------------------------------|----------|------------|-------|-------|------|------|------|
| CZ, Šumava, Žlíbský hill     | ZLI 01   | 40330      | 1,464 | 0,683 | 6,21 | 4,19 | 2,74 |
|                              | ZLI 02/1 | 40330      | 1,745 | 0,573 | 5,21 | 3,28 | 2,83 |
|                              | ZLI 02/2 | 40330      | 1,759 | 0,569 | 5,17 | 3,05 | 2,42 |
|                              | ZLI 03   | 40330      | 1,708 | 0,585 | 5,32 | 3,41 | 1,67 |
|                              | ZLI 04   | 40330      | 1,765 | 0,567 | 5,15 | 3,03 | 2,70 |
|                              | ZLI 05   | 1.6.2010   | 1,759 | 0,569 | 5,17 | 2,50 | 1,78 |
|                              | ZLI 06   | 7.6.2010   | 1,468 | 0,681 | 6,19 | 4,28 | 3,74 |
|                              | ZLI 07   | 1.6.2010   | 1,762 | 0,568 | 5,16 | 3,68 | 2,68 |
|                              | ZLI 08   | 1.6.2010   | 1,274 | 0,785 | 7,14 | 2,92 | 2,45 |
|                              | ZLI 09/1 | 1.6.2010   | 1,753 | 0,570 | 5,19 | 3,26 | 2,91 |
|                              | ZLI 09/2 | 1.6.2010   | 1,425 | 0,702 | 6,38 | 2,91 | 2,60 |
|                              | ZLI 10   | 1.6.2010   | 1,748 | 0,572 | 5,20 | 3,20 | 2,89 |
|                              | ZLI 11   | 7.6.2010   | 1,242 | 0,805 | 7,32 | 5,62 | 3,78 |
|                              | ZLI 12   | 7.6.2010   | 1,194 | 0,838 | 7,61 | 3,84 | 4,31 |
|                              | ZLI 13   | 7.6.2010   | 1,510 | 0,662 | 6,02 | 4,63 | 3,26 |
|                              | ZLI 14   | 7.6.2010   | 1,647 | 0,607 | 5,52 | 5,11 | 4,08 |
|                              | ZLI 15/1 | 7.6.2010   | 1,744 | 0,573 | 5,21 | 4,68 | 3,28 |
| ZLI 15/2                     | 7.6.2010 | 1,772      | 0,564 | 5,13  | 5,19 | 4,30 |      |
| CZ, Terezín, Červenka forest | KB1+P    | 10.12.2009 | 1,866 | 0,536 | 4,87 | 2,71 | 1,85 |
|                              | KB2+P    | 10.12.2009 | 1,669 | 0,599 | 5,45 | 2,59 | 1,90 |
|                              | KB3+P    | 10.12.2009 | 1,659 | 0,603 | 5,48 | 2,33 | 1,85 |
|                              | KB4+P    | 10.12.2009 | 1,804 | 0,554 | 5,04 | 3,05 | 2,37 |
|                              | KB5+P    | 10.12.2009 | 1,666 | 0,600 | 5,46 | 2,95 | 2,33 |
|                              | KB6+P    | 10.12.2009 | 1,862 | 0,537 | 4,88 | 3,40 | 2,48 |
|                              | KB7+P    | 10.12.2009 | 1,679 | 0,596 | 5,41 | 3,15 | 1,89 |
|                              | KB8+P    | 10.12.2009 | 1,823 | 0,549 | 4,99 | 3,06 | 2,51 |
|                              | KB9+P    | 10.12.2009 | 1,660 | 0,602 | 5,48 | 2,59 | 1,60 |
|                              | KB10+P   | 10.12.2009 | 1,868 | 0,535 | 4,87 | 2,57 | 1,60 |
|                              | KB11+P   | 10.12.2009 | 1,883 | 0,531 | 4,83 | 3,33 | 1,92 |
|                              | KB12+P   | 10.12.2009 | 1,666 | 0,600 | 5,46 | 2,35 | 1,29 |
|                              | KB13+P   | 10.12.2009 | 1,910 | 0,524 | 4,76 | 3,97 | 2,90 |
|                              | KB14+P   | 15.12.2009 | 1,838 | 0,544 | 4,95 | 2,58 | 2,62 |
|                              | KB15+P   | 15.12.2009 | 1,848 | 0,541 | 4,92 | 2,53 | 1,89 |
|                              | KB16+P   | 15.12.2009 | 1,652 | 0,605 | 5,50 | 2,21 | 1,38 |
|                              | KB17+P   | 15.12.2009 | 1,821 | 0,549 | 4,99 | 2,06 | 2,44 |
|                              | KB18+P   | 15.12.2009 | 1,634 | 0,612 | 5,56 | 1,93 | 1,81 |
|                              | KB19+P   | 15.12.2009 | 1,663 | 0,601 | 5,47 | 2,16 | 1,69 |
|                              | KB20+P   | 15.12.2009 | 1,644 | 0,608 | 5,53 | 2,53 | 1,71 |
|                              | KB21+P   | 15.12.2009 | 1,591 | 0,629 | 5,71 | 2,74 | 1,81 |
|                              | KB22+P   | 15.12.2009 | 1,657 | 0,604 | 5,49 | 2,45 | 1,86 |
|                              | KB23+P   | 15.12.2009 | 1,837 | 0,544 | 4,95 | 2,43 | 1,95 |
|                              | KB24+P   | 15.12.2009 | 1,833 | 0,546 | 4,96 | 1,95 | 1,09 |
|                              | KB25+P   | 14.12.2009 | 1,635 | 0,612 | 5,56 | 2,17 | 2,97 |
|                              | KB26+P   | 15.12.2009 | 1,828 | 0,547 | 4,97 | 2,28 | 1,37 |
|                              | KB27+P   | 15.12.2009 | 1,666 | 0,600 | 5,46 | 2,32 | 1,73 |
|                              | KB28+P   | 15.12.2009 | 1,809 | 0,553 | 5,02 | 3,38 | 2,17 |
|                              | KB29+P   | 14.12.2009 | 1,790 | 0,559 | 5,08 | 2,08 | 2,84 |
|                              | KB30+P   | 14.12.2009 | 1,791 | 0,558 | 5,08 | 3,37 | 2,74 |
|                              | T1+P     | 14.12.2009 | 1,636 | 0,611 | 5,56 | 2,93 | 2,20 |
|                              | T2+P     | 14.12.2009 | 1,818 | 0,550 | 5,00 | 3,66 | 2,56 |

|                              |                    |            |            |       |       |      |      |
|------------------------------|--------------------|------------|------------|-------|-------|------|------|
| CZ, Terezín, Červenka forest | T3+P               | 14.12.2009 | 1,810      | 0,552 | 5,02  | 3,36 | 2,28 |
|                              | T4+P               | 14.12.2009 | 1,723      | 0,580 | 5,28  | 3,29 | 1,96 |
|                              | T5+P               | 14.12.2009 | 1,586      | 0,631 | 5,73  | 2,10 | 2,45 |
|                              | T6+P               | 14.12.2009 | 1,682      | 0,595 | 5,40  | 2,86 | 2,04 |
|                              | T7+P               | 15.12.2009 | 1,776      | 0,563 | 5,12  | 2,95 | 1,67 |
|                              | T8+P               | 14.12.2009 | 1,786      | 0,560 | 5,09  | 2,77 | 2,32 |
|                              | T9+P               | 14.12.2009 | 1,723      | 0,580 | 5,28  | 2,63 | 1,72 |
|                              | T10+P              | 14.12.2009 | 1,813      | 0,552 | 5,01  | 2,83 | 2,10 |
|                              | CZ, Větrný Jeníkov | VJ1+P      | 26.10.2009 | 1,638 | 0,611 | 5,55 | 2,62 |
| VJ1                          |                    | 10.12.2009 | 1,643      | 0,609 | 5,53  | 3,33 | 2,03 |
| VJ2+P                        |                    | 26.10.2009 | 1,659      | 0,603 | 5,48  | 2,96 | 2,29 |
| VJ3+P                        |                    | 26.10.2009 | 1,700      | 0,588 | 5,35  | 2,97 | 2,72 |
| VJ3                          |                    | 10.12.2009 | 1,674      | 0,597 | 5,43  | 2,78 | 1,78 |
| VJ4+P                        |                    | 26.10.2009 | 1,657      | 0,604 | 5,49  | 2,53 | 2,27 |
| VJ5+P                        |                    | 26.10.2009 | 1,654      | 0,605 | 5,50  | 2,73 | 2,14 |
| A, Alps, Oberatuern          | RAK                | 18.10.2011 | 1,206      | 0,829 | 7,54  | 2,85 | 2,37 |
| A, Hochficht                 | HOCH1              | 18.10.2007 | 1,219      | 0,820 | 7,46  | 2,30 |      |
|                              | HOCH2              | 18.10.2007 | 1,236      | 0,809 | 7,35  | 2,76 |      |
|                              | HOCH3              | 18.10.2007 | 1,241      | 0,806 | 7,32  | 2,85 |      |
|                              | HOCH4              | 19.10.2007 | 1,252      | 0,799 | 7,26  | 2,79 |      |
|                              | HOCH5              | 19.10.2007 | 1,255      | 0,797 | 7,24  | 2,28 |      |
|                              | HOCH6              | 19.10.2007 | 1,256      | 0,796 | 7,24  | 2,99 |      |
|                              | HOCH7              | 19.10.2007 | 1,258      | 0,795 | 7,23  | 3,00 |      |
|                              | HOCH8              | 19.10.2007 | 1,261      | 0,793 | 7,21  | 2,40 |      |
|                              | HOCH9              | 19.10.2007 | 1,262      | 0,792 | 7,20  | 4,23 |      |
|                              | HOCH10             | 19.10.2007 | 1,264      | 0,791 | 7,19  | 2,86 |      |
|                              | HOCH11             | 19.10.2007 | 1,264      | 0,791 | 7,19  | 3,15 |      |
|                              | HOCH12             | 19.10.2007 | 1,265      | 0,791 | 7,19  | 2,23 |      |
|                              | HOCH13             | 19.10.2007 | 1,266      | 0,790 | 7,18  | 3,37 |      |
|                              | HOCH14             | 19.10.2007 | 1,267      | 0,789 | 7,17  | 4,08 |      |
|                              | HOCH15             | 19.10.2007 | 1,267      | 0,789 | 7,17  | 1,22 |      |
|                              | HOCH16             | 19.10.2007 | 1,268      | 0,789 | 7,17  | 4,37 |      |
|                              | HOCH17             | 19.10.2007 | 1,268      | 0,789 | 7,17  | 3,20 |      |
|                              | HOCH18             | 19.10.2007 | 1,268      | 0,789 | 7,17  | 3,97 |      |
|                              | HOCH19             | 19.10.2007 | 1,271      | 0,787 | 7,15  | 2,81 |      |
|                              | HOCH20             | 19.10.2007 | 1,272      | 0,786 | 7,15  | 2,74 |      |
|                              | HOCH21             | 19.10.2007 | 1,275      | 0,784 | 7,13  | 2,22 |      |
|                              | HOCH22             | 19.10.2007 | 1,277      | 0,783 | 7,12  | 4,32 |      |
|                              | HOCH23             | 19.10.2007 | 1,279      | 0,782 | 7,11  | 2,46 |      |
|                              | HOCH24             | 19.10.2007 | 1,285      | 0,778 | 7,07  | 2,61 |      |
|                              | HOCH25             | 19.10.2007 | 1,287      | 0,777 | 7,06  | 2,98 |      |
|                              | HOCH26             | 19.10.2007 | 1,292      | 0,774 | 7,04  | 2,85 |      |
|                              | HOCH27             | 19.10.2007 | 1,292      | 0,774 | 7,04  | 4,22 |      |
|                              | HOCH28             | 19.10.2007 | 1,292      | 0,774 | 7,04  | 4,09 |      |
|                              | HOCH29             | 19.10.2007 | 1,297      | 0,771 | 7,01  | 4,12 |      |
|                              | HOCH30             | 19.10.2007 | 1,298      | 0,770 | 7,00  | 2,88 |      |
|                              | HOCH31             | 24.10.2007 | 1,303      | 0,767 | 6,98  | 2,57 |      |
|                              | HOCH32             | 24.10.2007 | 1,308      | 0,765 | 6,95  | 2,78 |      |
|                              | HOCH48             | 30.10.2007 | 1,616      | 0,619 | 5,63  | 2,67 |      |
|                              | HOCH49             | 31.10.2007 | 1,619      | 0,618 | 5,61  | 2,45 |      |

|                                           |           |            |       |       |      |      |      |
|-------------------------------------------|-----------|------------|-------|-------|------|------|------|
|                                           | HOCH50    | 31.10.2007 | 1,630 | 0,613 | 5,58 | 2,35 |      |
|                                           | HOCH51    | 12.11.2007 | 1,728 | 0,579 | 5,26 | 3,31 |      |
|                                           | HOCH52    | 13.11.2007 | 1,729 | 0,578 | 5,26 | 3,53 |      |
|                                           | HOCH53    | 13.11.2007 | 1,742 | 0,574 | 5,22 | 3,50 |      |
|                                           | HOCH54    | 13.11.2007 | 1,748 | 0,572 | 5,20 | 3,12 |      |
|                                           | HOCH55    | 13.11.2007 | 1,764 | 0,567 | 5,15 | 2,60 |      |
|                                           | HOCH56    | 14.11.2007 | 1,766 | 0,566 | 5,15 | 2,23 |      |
|                                           | HOCH57    | 14.11.2007 | 1,769 | 0,565 | 5,14 | 3,08 |      |
|                                           | HOCH58    | 14.11.2007 | 1,782 | 0,561 | 5,10 | 4,12 |      |
|                                           | HOCH59    | 14.11.2007 | 1,796 | 0,557 | 5,06 | 2,82 |      |
|                                           | HOCH60    | 14.11.2007 | 1,817 | 0,550 | 5,00 | 3,11 |      |
|                                           | HOCH61    | 14.11.2007 | 1,825 | 0,548 | 4,98 | 3,64 |      |
|                                           | HOCH62    | 14.11.2007 | 1,828 | 0,547 | 4,97 | 4,16 |      |
|                                           | HOCH63    | 14.11.2007 | 1,833 | 0,546 | 4,96 | 3,83 |      |
|                                           | HOCH64    | 14.11.2007 | 1,841 | 0,543 | 4,94 | 3,65 |      |
|                                           | HOCH65    | 14.11.2007 | 1,848 | 0,541 | 4,92 | 3,63 |      |
|                                           | HOCH66    | 14.11.2007 | 1,848 | 0,541 | 4,92 | 2,46 |      |
|                                           | HOCH67    | 14.11.2007 | 1,854 | 0,539 | 4,90 | 3,01 |      |
|                                           | HOCH68    | 14.11.2007 | 1,863 | 0,537 | 4,88 | 2,90 |      |
|                                           | HOCH69    | 14.11.2007 | 1,872 | 0,534 | 4,86 | 3,61 |      |
|                                           | HOCH70    | 14.11.2007 | 1,879 | 0,532 | 4,84 | 4,67 |      |
|                                           | HOCH71    | 14.11.2007 | 1,883 | 0,531 | 4,83 | 4,86 |      |
|                                           | HOCH72    | 14.11.2007 | 1,887 | 0,530 | 4,82 | 2,15 |      |
| A, Kärnten, Oberkolbnitz, Reisseck-gruppe | 12-09-A-1 | 7.9.2009   | 1,281 | 0,781 | 7,10 | 2,59 | 2,62 |
|                                           | 12-09-A-2 | 7.9.2009   | 1,271 | 0,787 | 7,15 | 2,57 | 2,57 |
|                                           | 12-09-A-3 | 7.9.2009   | 1,263 | 0,792 | 7,20 | 2,32 | 2,61 |
| F, Störsvik                               | FIN 8-1   | 8.9.2011   | 1,673 | 0,598 | 5,43 | 2,26 | 1,77 |
|                                           | FIN 8-2   | 8.9.2011   | 1,671 | 0,598 | 5,44 | 1,91 | 1,64 |
| F, Uusimaa, Nurmijärvi                    | FIN 5-1   | 8.9.2011   | 1,641 | 0,609 | 5,54 | 2,01 | 1,12 |
|                                           | FIN 5-2   | 5.9.2011   | 1,655 | 0,604 | 5,49 | 2,64 | 2,52 |
|                                           | FIN 5-3   | 5.9.2011   | 1,670 | 0,599 | 5,44 | 2,59 | 2,38 |
| F, Uusimaa, Nurmijärvi, Kiljava           | FIN 3-1   | 8.9.2011   | 1,664 | 0,601 | 5,46 | 2,47 | 1,46 |
|                                           | FIN 3-2   | 8.9.2011   | 1,683 | 0,594 | 5,40 | 2,14 | 1,57 |
| F, Uusimaa, Nurmijärvi, Kiljava           | FIN 4-1   | 6.9.2011   | 1,678 | 0,596 | 5,42 | 2,59 | 2,94 |
|                                           | FIN 4-2   | 6.9.2011   | 1,743 | 0,574 | 5,22 | 3,10 | 2,85 |
| F, Uusimaa, Tammisaari                    | FIN 1-1+P | 6.9.2011   | 1,747 | 0,572 | 5,20 | 2,88 | 2,63 |
|                                           | FIN 1-2   | 6.9.2011   | 1,771 | 0,565 | 5,13 | 2,95 | 2,75 |
| F, Varsinais-Suomi                        | FIN 6-1   | 8.9.2011   | 1,663 | 0,601 | 5,47 | 2,82 | 1,46 |
|                                           | FIN 6-2   | 6.9.2011   | 1,770 | 0,565 | 5,14 | 2,93 | 2,75 |
| F, Varsinais-Suomi                        | FIN 7-1   | 6.9.2011   | 1,684 | 0,594 | 5,40 | 2,98 | 2,98 |
|                                           | FIN 7-2   | 6.9.2011   | 1,712 | 0,584 | 5,31 | 2,68 | 2,47 |
| F, Varsinais-Suomi, Kiikala, Tarvakas     | FIN 2     | 8.9.2011   | 1,696 | 0,590 | 5,36 | 2,29 | 1,64 |
| GB, Scotland                              | SK 1-1    | 5.9.2011   | 1,272 | 0,786 | 7,15 | 3,40 | 2,42 |
|                                           | SK 1-2    | 8.9.2011   | 1,252 | 0,799 | 7,26 | 2,07 | 1,58 |
|                                           | SK 1-3    | 8.9.2011   | 1,249 | 0,801 | 7,28 | 2,33 | 1,44 |
| GB, Scotland                              | SK 2-1    | 5.9.2011   | 1,266 | 0,790 | 7,18 | 3,57 | 2,62 |
|                                           | SK 2-2    | 5.9.2011   | 1,271 | 0,787 | 7,15 | 3,73 | 3,01 |
|                                           | SK 3-c    | 5.9.2011   | 1,279 | 0,782 | 7,11 | 2,40 | 2,24 |
|                                           | SK 3a - 1 | 5.9.2011   | 1,240 | 0,806 | 7,33 | 3,01 | 3,18 |

|                                       |           |            |       |       |      |      |      |
|---------------------------------------|-----------|------------|-------|-------|------|------|------|
| GB, Scotland                          | SK 3a - 2 | 5.9.2011   | 1,241 | 0,806 | 7,32 | 2,88 | 2,90 |
|                                       | SK 3a - 3 | 5.9.2011   | 1,263 | 0,792 | 7,20 | 2,27 | 2,33 |
|                                       | SK 3b -1  | 5.9.2011   | 1,276 | 0,784 | 7,12 | 2,25 | 2,77 |
|                                       | SK 3b -2  | 5.9.2011   | 1,293 | 0,773 | 7,03 | 1,89 | 2,38 |
|                                       | SK 3d     | 5.9.2011   | 1,288 | 0,776 | 7,06 | 2,96 | 2,88 |
| GB, Scotland                          | SK 4-2_2  | 8.9.2011   | 1,248 | 0,801 | 7,28 | 2,82 | 1,45 |
|                                       | SK 4-3    | 6.9.2011   | 1,278 | 0,782 | 7,11 | 2,28 | 2,36 |
|                                       | SK 4-4    | 6.9.2011   | 1,291 | 0,775 | 7,04 | 3,03 | 2,58 |
|                                       | SK 4-5    | 8.9.2011   | 1,261 | 0,793 | 7,21 | 2,26 | 1,43 |
| GB, Scotland, Knockhan Crag           | VB        | 24.10.2011 | 1,256 | 0,796 | 7,24 | 2,19 | 2,07 |
| N, Alnesvatnet                        | SC3       | 7.9.2009   | 1,280 | 0,781 | 7,10 | 2,51 | 2,33 |
| N, Dalsvelen                          | SC5       | 7.9.2009   | 1,675 | 0,597 | 5,43 | 2,64 | 2,61 |
| N, Järvsö                             | NORC -1   | 8.9.2011   | 1,621 | 0,617 | 5,61 | 2,91 | 1,66 |
|                                       | NORC -2   | 8.9.2011   | 1,664 | 0,601 | 5,46 | 2,29 | 1,60 |
|                                       | NORC -3   | 8.9.2011   | 1,662 | 0,602 | 5,47 | 2,86 | 1,51 |
| N, Kalkovo                            | SC10      | 7.9.2009   | 1,291 | 0,775 | 7,04 | 2,08 | 1,22 |
| N, Linneset                           | SC6-1     | 7.9.2009   | 1,655 | 0,604 | 5,49 | 1,93 | 1,36 |
|                                       | SC6-2     | 7.9.2009   | 1,649 | 0,606 | 5,51 | 1,77 | 1,68 |
|                                       | SC6-3     | 7.9.2009   | 1,656 | 0,604 | 5,49 | 1,95 | 1,77 |
|                                       | SC6-4     | 7.9.2009   | 1,650 | 0,606 | 5,51 | 2,53 | 2,24 |
|                                       | SC6-5     | 7.9.2009   | 1,674 | 0,597 | 5,43 | 2,24 | 2,28 |
|                                       | SC6-6     | 7.9.2009   | 1,676 | 0,597 | 5,42 | 2,17 | 1,71 |
|                                       | SC6-7     | 7.9.2009   | 1,672 | 0,598 | 5,44 | 2,71 | 1,90 |
|                                       | SC6-8     | 7.9.2009   | 1,654 | 0,605 | 5,50 | 2,59 | 2,40 |
|                                       | SC6-9     | 7.9.2009   | 1,647 | 0,607 | 5,52 | 2,14 | 1,90 |
| N, between Formofoss and Sandmoen     | SC7       | 7.9.2009   | 1,283 | 0,779 | 7,08 | 2,33 | 1,68 |
| N, between Breidsjøen and Fofervatnet | SC9       | 7.9.2009   | 1,303 | 0,767 | 6,98 | 2,50 | 2,31 |
| N, between Dovre and Folldal          | SC4       | 7.9.2009   | 1,293 | 0,773 | 7,03 | 2,14 | 1,90 |
| N, between Lesja and Skogbygde        | SC8       | 7.9.2009   | 1,296 | 0,772 | 7,01 | 2,59 | 1,89 |
| N, NP Jotunheimen                     | NORB 1    | 5.9.2011   | 1,277 | 0,783 | 7,12 | 2,72 | 2,31 |
|                                       | NORB 2    | 5.9.2011   | 1,259 | 0,794 | 7,22 | 2,86 | 2,24 |
| N, near NP Rondane                    | GPS21     | 10.9.2008  | 1,277 | 0,783 | 7,12 | 3,00 | 2,48 |
|                                       | GPS25     | 10.9.2008  | 1,258 | 0,795 | 7,23 | 2,87 | 2,96 |
|                                       | Solkpass  | 11.9.2008  | 1,267 | 0,789 | 7,17 | 2,12 | 2,11 |
| N, Torsefeatn                         | SC1       | 7.9.2009   | 1,286 | 0,778 | 7,07 | 2,42 | 1,96 |
| N, Trollhsimon                        | NOR 1     | 5.9.2011   | 1,278 | 0,782 | 7,11 | 2,99 | 2,25 |
|                                       | NOR 2     | 8.9.2011   | 1,247 | 0,802 | 7,29 | 2,92 | 1,67 |
| N, Vik                                | SC2       | 7.9.2009   | 1,287 | 0,777 | 7,06 | 2,35 | 1,62 |

## Numerical Morphometrics

### Central Europe

| ID      | taxa         | v2  | v3  | v4  | v5   | v6  | v7  | v8  | v9   | v10 | v11 | v12 | v13 | v14 | v15  | v16 | v17 | GS (2C) |
|---------|--------------|-----|-----|-----|------|-----|-----|-----|------|-----|-----|-----|-----|-----|------|-----|-----|---------|
| KR 1_27 | <i>D. i.</i> | 1,4 | 3,0 | 0,5 | 1,8  | 2,1 | 2,9 | 0,6 | 0,6  | 0,9 | 1,8 | 1,4 | 3,3 | 0,7 | 1,5  | 1,9 | 1,2 | 6,01    |
| 2Š1     | <i>D. t.</i> | 1,5 | 2,4 | 0,4 | 0,7  | 1,7 | 2,3 | 0,4 | 0,6  | 0,4 | 1,1 | 1,4 | 2,4 | 0,5 | 0,5  | 1,4 | 0,9 | 5,07    |
| 2Š10    | <i>D. a.</i> | 2,2 | 2,3 | 0,8 | -0,2 | 2,0 | 2,1 | 0,7 | 0,2  | 0,8 | 2,5 | 2,7 | 2,3 | 0,8 | 0,4  | 1,7 | 0,9 | 7,16    |
| 2Š11    | <i>D. a.</i> | 1,3 | 2,1 | 0,6 | 0,4  | 1,9 | 2,1 | 0,5 | 0,3  | 0,6 | 1,7 | 1,6 | 2,6 | 0,9 | 0,7  | 1,8 | 0,9 | 7,31    |
| 2Š12    | <i>D. a.</i> | 2,1 | 1,9 | 0,8 | 0,0  | 2,2 | 2,0 | 0,6 | 0,2  | 0,8 | 2,3 | 1,1 | 1,6 | 0,8 | 0,4  | 1,7 | 0,9 | 7,32    |
| 2Š13    | <i>D. a.</i> | 2,4 | 2,5 | 0,7 | 0,1  | 2,1 | 2,5 | 0,6 | 0,4  | 0,8 | 2,5 | 1,4 | 2,2 | 0,8 | 0,5  | 1,7 | 0,8 | 7,41    |
| 2Š14    | <i>D. a.</i> | 1,5 | 1,8 | 0,7 | 0,5  | 2,0 | 2,0 | 0,7 | 0,2  | 0,6 | 1,9 | 1,2 | 1,9 | 0,8 | 0,2  | 1,8 | 1,0 | 7,35    |
| 2Š15    | <i>D. a.</i> | 1,5 | 2,2 | 0,8 | 0,4  | 2,3 | 2,0 | 0,4 | 0,5  | 0,9 | 2,3 | 1,4 | 2,2 | 0,9 | 0,6  | 1,4 | 0,5 | 7,46    |
| 2Š2     | <i>D. a.</i> | 2,1 | 2,8 | 0,7 | 1,0  | 2,3 | 2,8 | 0,5 | 0,8  | 0,7 | 1,9 | 1,7 | 2,1 | 0,7 | 0,8  | 1,3 | 0,7 | 7,12    |
| 2Š3     | <i>D. t.</i> | 1,3 | 2,0 | 0,3 | 0,6  | 1,3 | 1,8 | 0,5 | 0,6  | 0,4 | 1,4 | 1,5 | 1,9 | 0,5 | 0,5  | 1,6 | 1,1 | 5,12    |
| 2Š4     | <i>D. a.</i> | 1,5 | 1,9 | 0,6 | 0,5  | 1,7 | 1,8 | 0,7 | 0,3  | 0,6 | 2,1 | 1,6 | 1,9 | 0,7 | 0,3  | 2,0 | 1,3 | 7,28    |
| 2Š5     | <i>D. a.</i> | 1,9 | 2,1 | 0,7 | -0,2 | 1,5 | 1,9 | 0,6 | 0,2  | 0,6 | 1,6 | 2,2 | 1,4 | 0,8 | -0,5 | 1,6 | 0,9 | 7,14    |
| 2Š6     | <i>D. a.</i> | 2,4 | 2,2 | 0,8 | -0,3 | 2,4 | 2,1 | 0,8 | -0,1 | 0,5 | 2,4 | 2,0 | 1,9 | 0,9 | 0,2  | 1,9 | 1,1 | 7,22    |
| 2Š8     | <i>D. i.</i> | 2,0 | 2,2 | 0,5 | 0,2  | 1,8 | 2,4 | 0,6 | 0,7  | 0,5 | 1,9 | 2,9 | 1,7 | 0,6 | -0,3 | 1,6 | 1,0 | 6,32    |
| 2Š9     | <i>D. a.</i> | 1,2 | 1,8 | 0,7 | 1,7  | 1,9 | 2,0 | 0,5 | 0,2  | 0,7 | 1,9 | 1,4 | 1,2 | 0,8 | 0,3  | 1,6 | 0,8 | 7,15    |
| 2Š9     | <i>D. a.</i> | 1,8 | 1,6 | 0,6 | -0,4 | 2,0 | 1,5 | 0,4 | -0,2 | 0,5 | 1,8 | 2,2 | 1,5 | 0,5 | -0,3 | 1,7 | 1,2 | 7,15    |
| A_1     | <i>D. a.</i> | 2,3 | 2,4 | 0,7 | 0,1  | 1,9 | 2,4 | 0,0 | -1,1 | 0,8 | 2,1 | 2,9 | 2,1 | 0,7 | 0,7  | 1,5 | 0,8 | 7,10    |
| A_2     | <i>D. a.</i> | 1,9 | 1,9 | 0,8 | -0,4 | 2,5 | 2,1 | 0,0 | -0,5 | 0,9 | 1,8 | 1,8 | 1,6 | 0,6 | 0,6  | 1,5 | 0,8 | 7,15    |
| A_3     | <i>D. a.</i> | 2,3 | 1,8 | 0,8 | -0,5 | 1,9 | 1,9 | 0,0 | -0,3 | 1,0 | 1,9 | 2,7 | 2,1 | 0,7 | 0,6  | 1,4 | 0,7 | 7,20    |
| ALP 1   | <i>D. a.</i> | 1,8 | 1,9 | 0,7 | -0,1 | 1,7 | 1,9 | 0,8 | 0,0  | 0,5 | 2,0 | 1,5 | 2,2 | 0,8 | 0,7  | 1,3 | 0,5 | 7,23    |
| BD1     | <i>D. a.</i> | 1,8 | 2,9 | 0,6 | 0,5  | 2,2 | 3,0 | 0,5 | 0,9  | 0,6 | 1,9 | 1,6 | 2,3 | 0,7 | 0,3  | 1,7 | 1,8 | 7,28    |
| BD2     | <i>D. a.</i> | 2,5 | 2,7 | 0,7 | 0,1  | 2,4 | 3,3 | 0,8 | 1,2  | 0,9 | 2,9 | 2,9 | 2,7 | 0,8 | 0,7  | 1,8 | 1,8 | 7,37    |
| BD3     | <i>D. a.</i> | 2,2 | 3,8 | 0,8 | 1,1  | 2,3 | 3,7 | 0,9 | 1,3  | 0,7 | 2,8 | 2,1 | 2,9 | 0,9 | 0,7  | 1,7 | 1,8 | 7,31    |
| BD4     | <i>D. a.</i> | 2,0 | 2,2 | 0,7 | 0,3  | 2,1 | 2,4 | 0,7 | 0,2  | 0,6 | 2,0 | 1,3 | 2,0 | 0,9 | 0,3  | 2,0 | 2,1 | 7,28    |
| BD5     | <i>D. a.</i> | 2,1 | 2,2 | 0,6 | 0,0  | 2,1 | 2,2 | 0,8 | 0,0  | 0,7 | 2,4 | 1,9 | 2,3 | 0,9 | -0,2 | 2,0 | 2,1 | 7,35    |
| BD6     | <i>D. a.</i> | 2,1 | 2,8 | 0,5 | 0,4  | 1,9 | 2,1 | 0,6 | 0,6  | 0,5 | 1,9 | 1,4 | 2,9 | 0,7 | 1,1  | 1,5 | 1,5 | 7,35    |
| BEČ 1   | <i>D. z.</i> | 2,0 | 3,4 | 0,5 | 1,5  | 2,2 | 3,0 | 1,1 | 0,8  | 0,8 | 2,5 | 1,5 | 2,6 | 0,6 | 0,9  | 2,3 | 2,3 | 5,36    |
| BEČ 10  | <i>D. c.</i> | 1,3 | 2,7 | 0,4 | 1,1  | 1,5 | 1,9 | 0,6 | 0,5  | 0,5 | 2,0 | 1,3 | 2,8 | 0,6 | 1,0  | 2,0 | 2,1 | 5,57    |
| BEČ 11  | <i>D. c.</i> | 1,0 | 2,2 | 0,3 | 1,3  | 0,9 | 2,4 | 0,4 | 1,3  | 0,6 | 2,3 | 1,4 | 1,9 | 0,5 | 0,2  | 1,6 | 1,7 | 5,57    |
| BEČ 12  | <i>D. c.</i> | 1,3 | 1,9 | 0,3 | 0,8  | 1,8 | 2,9 | 0,5 | 0,9  | 0,6 | 2,2 | 1,1 | 2,0 | 0,5 | 0,6  | 1,5 | 1,6 | 5,62    |
| BEČ 13  | <i>D. c.</i> | 1,3 | 2,5 | 0,4 | 0,9  | 1,5 | 2,6 | 0,5 | 1,0  | 0,6 | 2,2 | 1,5 | 2,7 | 0,5 | 0,9  | 1,4 | 1,5 | 5,50    |
| BEČ 2   | <i>D. c.</i> | 1,3 | 2,8 | 0,4 | 1,1  | 1,7 | 3,3 | 0,7 | 1,8  | 0,7 | 2,0 | 1,6 | 3,4 | 0,8 | 1,8  | 1,9 | 2,2 | 5,41    |
| BEČ 3   | <i>D. c.</i> | 1,2 | 2,2 | 0,4 | 1,4  | 1,5 | 2,5 | 0,7 | 0,9  | 0,7 | 2,5 | 1,8 | 2,8 | 0,7 | 1,3  | 2,3 | 2,5 | 5,43    |
| BEČ 4   | <i>D. c.</i> | 1,0 | 1,7 | 0,3 | 0,4  | 1,6 | 1,8 | 0,6 | 0,2  | 0,5 | 2,1 | 1,4 | 1,9 | 0,5 | 0,8  | 1,9 | 2,0 | 5,52    |
| BEČ 5   | <i>D. c.</i> | 1,0 | 2,6 | 0,4 | 1,2  | 1,6 | 2,4 | 0,6 | 0,9  | 0,5 | 1,9 | 1,6 | 2,2 | 0,5 | 0,7  | 1,5 | 1,5 | 5,45    |
| BEČ 6   | <i>D. i.</i> | 2,0 | 2,8 | 0,6 | 0,2  | 2,1 | 2,6 | 0,7 | 0,0  | 0,6 | 2,3 | 2,0 | 2,6 | 0,8 | 0,2  | 2,0 | 2,1 | 6,40    |
| BEČ 7   | <i>D. i.</i> | 2,0 | 3,1 | 0,8 | 0,8  | 2,1 | 3,0 | 0,9 | 0,5  | 0,6 | 2,1 | 1,9 | 3,2 | 0,9 | 0,7  | 2,3 | 2,3 | 6,42    |
| BEČ 8   | <i>D. c.</i> | 1,5 | 2,8 | 0,4 | 1,3  | 1,9 | 2,9 | 0,9 | 1,1  | 1,0 | 2,1 | 1,8 | 3,1 | 0,8 | 1,3  | 2,6 | 2,8 | 5,39    |
| BEČ 9   | <i>D. c.</i> | 2,1 | 3,0 | 0,4 | 0,2  | 2,2 | 3,3 | 1,1 | 1,0  | 1,0 | 2,7 | 1,9 | 2,1 | 0,5 | 0,5  | 2,4 | 2,5 | 5,59    |
| BES 01  | <i>D. a.</i> | 2,4 | 4,3 | 0,5 | 1,8  | 2,1 | 4,2 | 0,5 | 1,9  | 0,5 | 2,1 | 1,9 | 4,5 | 0,6 | 2,0  | 1,6 | 1,7 | 7,36    |
| BES 02  | <i>D. a.</i> | 2,2 | 5,0 | 0,8 | 2,5  | 2,2 | 5,2 | 0,8 | 3,0  | 0,7 | 2,8 | 2,5 | 5,5 | 0,8 | 2,2  | 1,9 | 1,9 | 7,37    |
| BES 03  | <i>D. c.</i> | 0,9 | 3,6 | 0,3 | 2,5  | 1,8 | 3,5 | 1,0 | 2,1  | 0,9 | 3,7 | 1,4 | 3,9 | 0,5 | 2,2  | 1,5 | 1,6 | 5,61    |
| BES 04  | <i>D. a.</i> | 1,8 | 1,9 | 0,6 | 0,2  | 2,0 | 2,1 | 0,5 | 0,2  | 0,8 | 2,0 | 1,9 | 2,0 | 0,3 | 0,2  | 1,1 | 1,0 | 7,51    |
| BES 05  | <i>D. a.</i> | 2,2 | 3,8 | 0,5 | 1,3  | 2,2 | 3,2 | 0,7 | 1,5  | 0,6 | 2,1 | 2,2 | 3,7 | 0,7 | 1,8  | 1,7 | 1,8 | 7,34    |



|         |              |     |     |     |      |     |     |     |      |     |     |     |     |     |      |     |     |      |
|---------|--------------|-----|-----|-----|------|-----|-----|-----|------|-----|-----|-----|-----|-----|------|-----|-----|------|
| BES 07  | <i>D. c.</i> | 1,2 | 3,5 | 0,5 | 2,0  | 1,6 | 3,6 | 0,8 | 2,1  | 0,8 | 2,4 | 1,7 | 3,9 | 0,4 | 1,9  | 2,2 | 2,2 | 5,47 |
| BES 08  | <i>D. c.</i> | 0,7 | 2,6 | 0,2 | 2,0  | 1,3 | 2,1 | 0,7 | 1,5  | 0,5 | 2,5 | 1,3 | 2,7 | 0,5 | 1,7  | 1,9 | 2,1 | 5,35 |
| BES 09  | <i>D. a.</i> | 2,8 | 4,6 | 0,5 | 2,0  | 2,8 | 4,6 | 0,7 | 2,6  | 0,8 | 3,0 | 2,6 | 4,9 | 0,9 | 2,5  | 1,8 | 2,0 | 7,22 |
| BESK1   | <i>D. c.</i> | 1,0 | 2,7 | 0,3 | 2,8  | 1,8 | 2,6 | 0,9 | 1,5  | 0,9 | 2,4 | 1,9 | 2,9 | 0,7 | 1,2  | 1,8 | 1,0 | 5,48 |
| BESK2   | <i>D. c.</i> | 0,8 | 2,2 | 0,4 | 1,2  | 1,5 | 2,2 | 0,4 | 1,2  | 0,5 | 1,8 | 1,4 | 2,3 | 0,4 | 0,9  | 1,3 | 0,9 | 5,43 |
| BESK3   | <i>D. c.</i> | 0,9 | 2,7 | 0,5 | 1,8  | 1,3 | 3,0 | 0,7 | 1,8  | 0,5 | 1,4 | 1,3 | 2,6 | 0,5 | 1,3  | 1,6 | 1,1 | 5,70 |
| BESK4   | <i>D. c.</i> | 1,2 | 2,7 | 0,3 | 1,8  | 1,5 | 2,9 | 0,8 | 1,8  | 0,8 | 2,2 | 1,5 | 2,8 | 0,5 | 1,3  | 1,5 | 1,0 | 5,45 |
| BESK5   | <i>D. c.</i> | 1,3 | 2,6 | 0,4 | 1,2  | 1,6 | 2,4 | 0,7 | 0,8  | 0,6 | 2,0 | 1,6 | 2,7 | 0,6 | 1,5  | 1,7 | 1,1 | 5,34 |
| Brdy    | <i>D. t.</i> | 2,9 | 3,1 | 0,6 | 0,4  | 1,8 | 3,1 | 0,6 | 1,7  | 0,4 | 1,5 | 1,7 | 2,9 | 0,7 | 1,0  | 1,4 | 1,5 | 5,05 |
| BUC 01  | <i>D. a.</i> | 2,3 | 2,3 | 0,7 | 0,1  | 2,1 | 2,3 | 0,7 | 0,0  | 0,7 | 2,4 | 2,6 | 2,0 | 0,9 | 0,1  | 1,1 | 1,2 | 7,27 |
| BUC 02  | <i>D. a.</i> | 2,4 | 2,8 | 0,7 | 0,6  | 2,3 | 2,7 | 1,1 | 0,6  | 0,7 | 3,2 | 2,0 | 3,0 | 0,8 | 0,3  | 1,1 | 1,2 | 7,04 |
| BUC 03  | <i>D. a.</i> | 2,4 | 2,8 | 0,5 | 0,5  | 2,5 | 2,6 | 0,7 | 0,2  | 0,7 | 2,4 | 2,1 | 2,8 | 0,9 | 0,5  | 1,0 | 1,2 | 7,00 |
| BUC 04  | <i>D. a.</i> | 2,6 | 2,4 | 0,9 | 0,4  | 2,1 | 2,2 | 0,5 | -0,1 | 0,6 | 2,2 | 2,3 | 2,1 | 0,8 | 0,1  | 2,1 | 2,1 | 7,18 |
| BUC 05  | <i>D. a.</i> | 2,3 | 2,4 | 0,7 | 0,1  | 2,2 | 2,3 | 0,7 | 0,2  | 0,7 | 2,1 | 2,5 | 2,8 | 0,9 | 0,4  | 1,4 | 1,5 | 7,15 |
| BUC 06  | <i>D. a.</i> | 2,3 | 2,9 | 0,4 | 0,6  | 2,2 | 2,9 | 0,7 | 1,0  | 0,8 | 2,8 | 2,0 | 3,3 | 0,8 | 1,1  | 1,0 | 1,2 | 7,23 |
| BUC 07  | <i>D. a.</i> | 1,6 | 3,3 | 0,6 | 1,5  | 1,9 | 3,9 | 0,9 | 1,4  | 0,7 | 2,3 | 2,2 | 3,2 | 0,9 | 1,1  | 2,5 | 2,6 | 7,02 |
| BUC 08  | <i>D. a.</i> | 1,8 | 1,8 | 0,6 | 0,3  | 1,4 | 1,9 | 0,8 | 0,2  | 0,5 | 2,1 | 1,8 | 1,9 | 0,8 | 0,3  | 2,2 | 2,3 | 6,97 |
| BUC 09  | <i>D. a.</i> | 2,2 | 3,2 | 0,7 | 0,5  | 2,6 | 2,7 | 0,8 | 0,3  | 0,7 | 2,4 | 2,2 | 2,6 | 0,8 | 0,5  | 2,3 | 2,4 | 6,91 |
| BUC1    | <i>D. a.</i> | 2,3 | 2,7 | 0,8 | 0,4  | 2,1 | 2,4 | 1,0 | 0,2  | 0,6 | 2,1 | 1,7 | 2,6 | 1,0 | 0,7  | 2,8 | 1,8 | 6,70 |
| BUC2    | <i>D. a.</i> | 2,2 | 3,4 | 0,8 | 1,2  | 2,5 | 3,7 | 1,1 | 1,4  | 0,6 | 2,4 | 1,9 | 2,6 | 1,0 | 1,0  | 2,9 | 1,9 | 7,01 |
| BUC3    | <i>D. a.</i> | 1,9 | 2,3 | 0,5 | 0,2  | 2,1 | 2,2 | 0,7 | 0,4  | 0,5 | 2,2 | 1,9 | 2,5 | 0,7 | 0,4  | 2,7 | 2,0 | 7,32 |
| BUC4    | <i>D. a.</i> | 2,8 | 3,3 | 0,9 | 0,4  | 3,2 | 2,9 | 0,6 | 0,5  | 0,7 | 2,7 | 2,2 | 3,5 | 1,0 | 1,2  | 2,8 | 1,8 | 7,14 |
| BUC5    | <i>D. a.</i> | 2,0 | 2,0 | 0,6 | 0,1  | 2,0 | 1,7 | 0,6 | 0,0  | 0,6 | 1,7 | 1,6 | 2,1 | 0,6 | 0,2  | 2,2 | 1,6 | 6,43 |
| BUC6    | <i>D. a.</i> | 2,7 | 2,9 | 0,8 | 0,3  | 2,5 | 2,8 | 0,7 | 0,3  | 0,7 | 2,5 | 2,3 | 2,9 | 0,9 | 0,7  | 2,5 | 1,6 | 7,29 |
| BUC7    | <i>D. a.</i> | 2,1 | 3,2 | 0,7 | 1,1  | 1,8 | 3,2 | 0,8 | 1,6  | 0,7 | 2,1 | 1,9 | 3,6 | 1,0 | 2,1  | 2,6 | 1,7 | 6,58 |
| CBS 01A | <i>D. i.</i> | 1,5 | 1,8 | 0,4 | 0,3  | 2,0 | 1,8 | 0,8 | -0,1 | 0,6 | 2,5 | 1,4 | 1,8 | 0,8 | 0,1  | 2,3 | 2,5 | 6,57 |
| CBS 01B | <i>D. i.</i> | 1,9 | 2,6 | 0,4 | 0,6  | 2,0 | 2,0 | 0,8 | 0,6  | 0,6 | 2,4 | 1,4 | 2,4 | 0,8 | 0,7  | 2,3 | 2,5 | 6,35 |
| CBS 02  | <i>D. a.</i> | 2,3 | 2,9 | 0,7 | 0,2  | 2,1 | 2,5 | 0,9 | 0,0  | 0,7 | 2,5 | 2,1 | 2,6 | 0,8 | 0,2  | 1,6 | 1,6 | 7,25 |
| CBS 03  | <i>D. a.</i> | 2,7 | 2,2 | 0,8 | -0,3 | 2,1 | 2,4 | 0,5 | -0,1 | 0,7 | 2,1 | 2,1 | 2,1 | 1,0 | -0,1 | 2,2 | 2,3 | 7,25 |
| CBS 04  | <i>D. i.</i> | 1,9 | 2,7 | 0,5 | 1,0  | 2,1 | 2,1 | 0,9 | 0,2  | 0,6 | 2,0 | 1,7 | 2,3 | 0,7 | 0,7  | 2,1 | 2,2 | 6,50 |
| CBS 05  | <i>D. c.</i> | 0,9 | 1,8 | 0,3 | 0,8  | 1,1 | 1,7 | 0,6 | 0,5  | 0,5 | 1,7 | 1,2 | 1,7 | 0,6 | 0,4  | 1,9 | 2,0 | 5,49 |
| CBS 06  | <i>D. c.</i> | 1,2 | 2,7 | 0,4 | 1,6  | 1,7 | 2,8 | 0,7 | 1,5  | 0,7 | 2,5 | 1,0 | 2,8 | 0,5 | 1,5  | 2,1 | 2,1 | 5,51 |
| CBS 07  | <i>D. i.</i> | 1,6 | 2,8 | 0,5 | 1,1  | 1,8 | 3,0 | 0,9 | 0,6  | 0,6 | 1,7 | 1,7 | 2,8 | 0,9 | 0,7  | 2,2 | 2,4 | 6,33 |
| CBS 09  | <i>D. a.</i> | 1,6 | 2,3 | 0,8 | 0,3  | 2,0 | 2,0 | 0,6 | 0,5  | 0,6 | 2,0 | 1,9 | 1,9 | 0,8 | 0,4  | 1,5 | 1,5 | 7,25 |
| CBS 10  | <i>D. c.</i> | 0,6 | 2,3 | 0,4 | 1,5  | 1,7 | 1,8 | 0,5 | 0,4  | 0,7 | 1,7 | 1,3 | 1,8 | 0,5 | 0,7  | 1,6 | 1,7 | 5,56 |
| CER 01  | <i>D. z.</i> | 1,4 | 3,3 | 0,3 | 1,6  | 1,8 | 3,1 | 0,5 | 1,3  | 0,5 | 2,1 | 1,4 | 2,6 | 0,5 | 0,9  | 1,3 | 1,4 | 5,36 |
| CER 02  | <i>D. z.</i> | 1,4 | 3,3 | 0,4 | 2,0  | 1,8 | 3,5 | 0,6 | 1,9  | 0,5 | 1,6 | 1,7 | 3,0 | 0,7 | 1,3  | 1,2 | 1,4 | 5,39 |
| CER 03  | <i>D. c.</i> | 0,5 | 2,9 | 0,4 | 1,5  | 1,5 | 2,2 | 0,8 | 1,2  | 0,5 | 2,3 | 1,7 | 2,8 | 0,7 | 0,6  | 1,3 | 1,4 | 5,55 |
| CER 04  | <i>D. z.</i> | 1,4 | 1,6 | 0,4 | -0,3 | 1,3 | 1,2 | 0,4 | -0,2 | 0,4 | 1,3 | 1,3 | 1,4 | 0,5 | -0,1 | 1,4 | 1,4 | 5,20 |
| CER 05  | <i>D. i.</i> | 1,5 | 2,2 | 0,5 | 0,5  | 1,6 | 2,2 | 0,9 | 0,4  | 0,6 | 2,0 | 1,7 | 2,5 | 0,7 | 0,8  | 1,5 | 1,6 | 6,37 |
| CPL 01  | <i>D. a.</i> | 2,3 | 3,0 | 0,8 | 0,4  | 2,3 | 3,1 | 0,9 | 1,4  | 1,0 | 2,8 | 2,2 | 3,1 | 1,0 | 0,4  | 1,5 | 1,6 | 7,16 |
| CPL 02  | <i>D. a.</i> | 1,9 | 2,3 | 0,6 | 0,1  | 2,0 | 2,2 | 0,8 | 0,6  | 0,7 | 2,7 | 1,5 | 2,2 | 0,8 | 0,1  | 1,6 | 1,7 | 7,20 |
| CPL 03  | <i>D. a.</i> | 2,4 | 2,3 | 0,7 | -0,3 | 2,2 | 2,3 | 0,8 | 0,1  | 0,8 | 2,4 | 2,4 | 2,5 | 0,7 | -0,2 | 1,3 | 1,3 | 7,16 |
| CPL 04  | <i>D. a.</i> | 2,9 | 2,8 | 0,9 | -0,1 | 2,9 | 2,9 | 0,4 | 0,5  | 1,0 | 2,5 | 2,1 | 2,9 | 0,9 | 0,4  | 1,6 | 1,6 | 7,12 |
| CPL 05  | <i>D. a.</i> | 0,9 | 1,4 | 0,6 | 0,0  | 2,0 | 1,4 | 0,7 | -0,3 | 0,6 | 2,1 | 1,4 | 1,3 | 0,7 | -0,1 | 2,2 | 2,3 | 7,21 |
| CPL 06  | <i>D. a.</i> | 1,1 | 1,3 | 0,5 | -0,3 | 1,7 | 1,2 | 0,5 | -0,3 | 0,6 | 1,9 | 1,3 | 1,0 | 0,5 | -0,5 | 1,6 | 1,6 | 7,21 |
| CRU 01  | <i>D. c.</i> | 0,9 | 3,1 | 0,5 | 1,5  | 1,4 | 3,0 | 0,6 | 1,7  | 0,7 | 2,0 | 1,4 | 2,6 | 0,6 | 0,9  | 1,8 | 1,9 | 5,54 |
| CRU 02  | <i>D. c.</i> | 0,5 | 2,6 | 0,5 | 2,0  | 1,3 | 2,7 | 0,6 | 1,9  | 0,4 | 2,3 | 1,4 | 2,6 | 0,6 | 1,3  | 1,7 | 1,8 | 5,52 |
| CRU 03  | <i>D. c.</i> | 0,9 | 3,0 | 0,4 | 1,9  | 1,0 | 2,7 | 0,6 | 1,5  | 0,6 | 2,0 | 1,2 | 3,3 | 0,6 | 2,3  | 1,9 | 2,0 | 5,57 |
| CRU 04  | <i>D. c.</i> | 0,7 | 3,2 | 0,3 | 1,9  | 1,7 | 2,9 | 0,3 | 1,7  | 0,5 | 2,7 | 1,1 | 2,9 | 0,4 | 1,9  | 1,8 | 1,8 | 5,47 |

|         |              |     |     |     |      |     |     |     |      |     |     |     |     |     |      |     |     |      |
|---------|--------------|-----|-----|-----|------|-----|-----|-----|------|-----|-----|-----|-----|-----|------|-----|-----|------|
| CRU 05  | <i>D. c.</i> | 0,9 | 2,8 | 0,4 | 1,9  | 1,5 | 2,9 | 0,6 | 1,5  | 0,6 | 2,9 | 1,3 | 2,7 | 0,7 | 1,1  | 1,9 | 2,1 | 5,61 |
| CRU 06  | <i>D. c.</i> | 0,6 | 3,3 | 0,3 | 2,7  | 1,4 | 3,8 | 0,8 | 2,9  | 0,6 | 2,4 | 1,1 | 3,2 | 0,5 | 2,2  | 1,9 | 2,0 | 5,69 |
| HB1     | <i>D. i.</i> | 2,5 | 5,0 | 0,7 | 2,8  | 2,3 | 4,1 | 1,3 | 1,9  | 0,7 | 2,7 | 1,6 | 5,0 | 1,1 | 2,4  | 2,8 | 3,0 | 6,30 |
| HB2     | <i>D. i.</i> | 0,9 | 3,0 | 0,7 | 0,9  | 1,7 | 2,4 | 0,8 | 0,7  | 0,8 | 2,3 | 1,7 | 4,9 | 1,2 | 2,6  | 2,6 | 2,9 | 6,42 |
| HB3     | <i>D. i.</i> | 1,7 | 3,0 | 0,7 | 0,7  | 1,7 | 2,8 | 0,8 | 1,1  | 0,8 | 2,4 | 2,2 | 2,9 | 0,8 | 1,5  | 2,3 | 2,4 | 6,38 |
| HUR 01  | <i>D. a.</i> | 2,3 | 2,0 | 0,7 | -0,3 | 2,1 | 1,9 | 0,5 | -0,2 | 0,6 | 2,5 | 1,9 | 1,5 | 0,8 | 0,0  | 2,1 | 2,2 | 7,18 |
| HUR 02  | <i>D. a.</i> | 1,9 | 1,9 | 0,6 | 0,2  | 2,1 | 2,1 | 0,8 | 0,0  | 0,6 | 2,4 | 1,7 | 2,0 | 0,8 | 0,0  | 2,2 | 2,3 | 6,86 |
| HUR 03  | <i>D. a.</i> | 2,3 | 2,7 | 0,5 | 0,8  | 2,1 | 2,6 | 0,7 | 0,6  | 0,6 | 2,6 | 1,8 | 2,7 | 0,7 | 0,6  | 1,0 | 1,1 | 7,34 |
| Je 1_1  | <i>D. a.</i> | 1,9 | 2,4 | 0,6 | 0,6  | 2,1 | 2,6 | 0,8 | 0,4  | 0,8 | 2,5 | 2,2 | 2,5 | 0,8 | 0,2  | 1,0 | 1,1 | 7,68 |
| Je 1_2  | <i>D. a.</i> | 2,4 | 3,0 | 0,6 | 0,5  | 2,0 | 2,7 | 0,6 | 0,8  | 0,6 | 2,0 | 2,2 | 2,8 | 0,7 | 1,1  | 1,3 | 1,3 | 7,61 |
| Je 1_3  | <i>D. a.</i> | 2,5 | 5,9 | 0,6 | 2,7  | 2,6 | 5,6 | 0,6 | 3,4  | 0,7 | 2,8 | 2,1 | 6,1 | 0,8 | 3,1  | 1,0 | 1,1 | 7,67 |
| Je 1_4  | <i>D. a.</i> | 2,4 | 3,2 | 0,6 | 0,7  | 2,1 | 3,4 | 0,9 | 0,8  | 0,9 | 2,4 | 1,8 | 2,8 | 0,8 | 1,0  | 1,3 | 1,4 | 7,44 |
| Je 2_1  | <i>D. a.</i> | 2,4 | 1,6 | 0,9 | -0,6 | 1,8 | 1,6 | 0,5 | -0,3 | 0,9 | 2,1 | 2,4 | 1,8 | 0,9 | -0,5 | 1,7 | 1,7 | 7,66 |
| Je 3_1  | <i>D. a.</i> | 2,2 | 2,7 | 0,8 | 0,4  | 2,0 | 2,5 | 0,4 | 0,3  | 0,7 | 1,9 | 1,9 | 2,4 | 0,8 | 0,3  | 0,9 | 0,9 | 7,65 |
| Je 3_2  | <i>D. a.</i> | 2,8 | 3,0 | 0,9 | 0,5  | 3,3 | 2,9 | 0,5 | -0,3 | 0,8 | 1,5 | 3,0 | 3,2 | 0,8 | 0,3  | 1,4 | 1,3 | 7,40 |
| Je 3_3  | <i>D. a.</i> | 2,3 | 2,3 | 0,8 | 0,0  | 2,2 | 2,1 | 0,4 | 0,0  | 0,7 | 1,7 | 2,5 | 2,3 | 0,8 | -0,2 | 1,4 | 1,5 | 7,57 |
| Je 3_4  | <i>D. a.</i> | 2,6 | 3,8 | 1,2 | 1,3  | 2,4 | 3,5 | 0,4 | 1,6  | 0,8 | 2,1 | 2,2 | 3,2 | 1,0 | 1,4  | 1,3 | 1,2 | 7,37 |
| Je 4_1  | <i>D. a.</i> | 1,9 | 2,2 | 0,7 | 0,3  | 2,0 | 2,4 | 0,5 | 0,4  | 0,7 | 1,8 | 1,7 | 2,4 | 0,6 | 0,6  | 1,1 | 1,1 | 7,49 |
| Je 4_2  | <i>D. a.</i> | 2,1 | 2,0 | 0,8 | -0,1 | 1,8 | 2,0 | 0,6 | -0,1 | 0,7 | 2,1 | 1,9 | 1,6 | 0,7 | -0,3 | 0,8 | 0,8 | 7,49 |
| Je 5_1  | <i>D. a.</i> | 2,6 | 3,0 | 0,8 | 0,8  | 2,7 | 3,3 | 1,0 | 0,9  | 1,0 | 2,7 | 2,3 | 2,8 | 1,0 | 0,8  | 3,1 | 3,2 | 7,25 |
| Je 5_2  | <i>D. a.</i> | 2,1 | 2,6 | 0,8 | 0,3  | 2,1 | 2,5 | 0,4 | 0,3  | 0,6 | 2,1 | 2,0 | 3,0 | 0,9 | 0,5  | 1,5 | 1,6 | 7,41 |
| Je 5_3  | <i>D. a.</i> | 2,3 | 2,9 | 0,8 | 0,2  | 2,3 | 2,4 | 0,8 | 0,4  | 0,8 | 2,5 | 2,3 | 2,6 | 1,0 | 0,0  | 2,3 | 2,4 | 7,52 |
| Je 5_4  | <i>D. a.</i> | 2,0 | 2,6 | 0,9 | 0,2  | 2,3 | 2,6 | 0,5 | 0,0  | 0,6 | 2,3 | 2,5 | 2,5 | 1,0 | 0,1  | 1,9 | 1,9 | 7,39 |
| Je 5_6  | <i>D. a.</i> | 1,8 | 2,1 | 0,8 | 0,1  | 1,9 | 2,3 | 0,4 | 0,4  | 0,6 | 1,7 | 2,1 | 2,2 | 0,8 | -0,2 | 1,5 | 1,5 | 7,34 |
| Je 6_1  | <i>D. a.</i> | 2,3 | 3,7 | 0,5 | 1,3  | 2,3 | 3,7 | 0,8 | 1,6  | 0,9 | 2,8 | 1,7 | 3,4 | 0,7 | 2,0  | 0,9 | 1,0 | 7,48 |
| Je 6_10 | <i>D. a.</i> | 2,6 | 3,8 | 0,6 | 1,4  | 2,3 | 3,3 | 0,8 | 1,3  | 0,7 | 2,7 | 2,0 | 3,4 | 0,8 | 2,0  | 1,5 | 1,6 | 7,58 |
| Je 6_2  | <i>D. a.</i> | 2,4 | 2,6 | 0,9 | 0,0  | 2,4 | 2,7 | 0,7 | 0,3  | 0,7 | 2,5 | 2,6 | 2,7 | 0,9 | 0,6  | 1,3 | 1,3 | 7,38 |
| Je 6_3  | <i>D. a.</i> | 2,1 | 2,3 | 0,6 | 0,0  | 2,0 | 2,6 | 0,5 | 0,4  | 0,6 | 2,0 | 2,5 | 2,6 | 0,9 | 0,4  | 1,7 | 1,9 | 7,46 |
| Je 6_4  | <i>D. a.</i> | 1,5 | 1,4 | 0,6 | -0,2 | 1,8 | 1,4 | 0,5 | -0,1 | 0,6 | 2,4 | 1,5 | 1,6 | 0,7 | 0,0  | 1,7 | 1,7 | 7,21 |
| Je 6_5  | <i>D. a.</i> | 2,5 | 3,8 | 0,7 | 1,4  | 2,3 | 3,8 | 0,8 | 1,2  | 0,8 | 3,2 | 2,3 | 3,9 | 0,9 | 1,6  | 1,4 | 1,5 | 7,30 |
| Je 6_6  | <i>D. a.</i> | 2,1 | 2,6 | 0,7 | 0,4  | 2,0 | 2,3 | 0,7 | 0,9  | 0,8 | 2,8 | 1,9 | 2,3 | 0,8 | 1,2  | 1,1 | 1,1 | 7,43 |
| Je 6_7  | <i>D. a.</i> | 2,3 | 2,4 | 0,7 | 0,1  | 2,3 | 2,6 | 0,8 | 0,0  | 0,7 | 2,8 | 2,3 | 2,8 | 0,9 | 0,5  | 2,5 | 2,6 | 7,40 |
| Je 6_8  | <i>D. a.</i> | 1,7 | 2,0 | 0,7 | 0,3  | 1,9 | 1,9 | 0,4 | 0,4  | 0,7 | 2,4 | 1,9 | 2,0 | 0,7 | 0,0  | 0,9 | 0,9 | 7,47 |
| Je 6_9  | <i>D. a.</i> | 2,0 | 2,8 | 0,7 | 0,5  | 2,4 | 2,7 | 0,5 | 0,5  | 0,8 | 2,4 | 2,0 | 2,5 | 0,8 | 0,6  | 1,1 | 1,2 | 7,59 |
| K1      | <i>D. t.</i> | 1,4 | 2,1 | 0,6 | 0,7  | 1,4 | 2,0 | 0,0 | 0,4  | 0,4 | 1,5 | 1,4 | 8,6 | 0,6 | 0,5  | 1,5 | 0,8 | 4,86 |
| K2      | <i>D. c.</i> | 0,5 | 2,4 | 0,3 | 2,0  | 1,2 | 2,7 | 0,0 | 1,2  | 0,8 | 2,1 | 1,5 | 2,5 | 0,5 | 1,0  | 1,7 | 1,2 | 5,35 |
| K3      | <i>D. t.</i> | 1,7 | 1,8 | 0,6 | 0,7  | 1,3 | 2,5 | 0,0 | 0,4  | 0,4 | 1,3 | 1,4 | 1,9 | 0,7 | 0,6  | 1,5 | 0,8 | 4,85 |
| K4      | <i>D. t.</i> | 1,1 | 2,7 | 0,5 | 1,2  | 1,4 | 2,8 | 0,0 | 0,9  | 0,5 | 1,1 | 1,3 | 2,1 | 0,7 | 1,2  | 1,3 | 0,6 | 4,93 |
| K5      | <i>D. c.</i> | 1,3 | 3,3 | 0,5 | 2,5  | 1,5 | 3,4 | 0,0 | 1,5  | 0,9 | 2,6 | 1,4 | 3,1 | 0,6 | 0,8  | 2,1 | 1,5 | 5,48 |
| K6      | <i>D. t.</i> | 1,2 | 2,5 | 0,5 | 1,1  | 1,4 | 2,4 | 0,0 | 0,7  | 0,4 | 1,4 | 1,2 | 2,4 | 0,6 | 0,8  | 1,3 | 0,7 | 4,85 |
| K7      | <i>D. t.</i> | 1,2 | 2,3 | 0,4 | 1,0  | 1,3 | 2,5 | 0,0 | 1,1  | 0,4 | 1,3 | 1,4 | 2,3 | 0,3 | 1,3  | 1,1 | 0,8 | 4,93 |
| K8      | <i>D. t.</i> | 1,2 | 1,9 | 0,4 | 0,6  | 1,3 | 2,3 | 0,0 | 0,9  | 0,3 | 1,3 | 0,9 | 1,9 | 0,4 | 0,6  | 1,1 | 0,6 | 4,99 |
| KAL 1   | <i>D. c.</i> | 1,0 | 1,9 | 0,6 | 0,7  | 1,4 | 1,5 | 0,6 | 0,4  | 0,7 | 1,8 | 1,4 | 2,1 | 0,7 | 0,3  | 2,0 | 1,3 | 5,43 |
| KAL 2   | <i>D. c.</i> | 1,0 | 2,2 | 0,5 | 1,0  | 1,3 | 2,3 | 0,4 | 0,7  | 0,6 | 2,2 | 1,3 | 1,9 | 0,5 | 0,6  | 1,8 | 1,2 | 5,39 |
| KB 1    | <i>D. t.</i> | 1,3 | 2,1 | 0,5 | 0,9  | 1,4 | 2,2 | 0,4 | 0,7  | 0,4 | 1,4 | 1,5 | 2,2 | 0,5 | 0,8  | 1,3 | 0,9 | 4,87 |
| KB 10   | <i>D. t.</i> | 1,4 | 2,6 | 0,4 | 1,2  | 1,4 | 2,8 | 0,3 | 1,3  | 0,4 | 1,3 | 1,4 | 3,0 | 0,7 | 1,5  | 1,5 | 0,8 | 4,87 |
| KB 11   | <i>D. t.</i> | 1,6 | 3,9 | 0,3 | 2,2  | 1,6 | 3,4 | 0,3 | 1,7  | 0,5 | 0,9 | 1,4 | 3,5 | 0,4 | 2,1  | 1,4 | 1,0 | 4,83 |
| KB 12   | <i>D. c.</i> | 0,5 | 2,0 | 0,4 | 1,3  | 1,3 | 2,1 | 0,5 | 1,0  | 0,5 | 2,0 | 1,2 | 2,6 | 0,6 | 1,3  | 1,6 | 1,0 | 5,46 |
| KB 13   | <i>D. t.</i> | 1,3 | 2,2 | 0,5 | 0,7  | 1,5 | 2,2 | 0,4 | 0,7  | 0,4 | 1,2 | 1,5 | 2,3 | 0,6 | 0,8  | 1,5 | 0,8 | 4,73 |

|         |       |     |     |     |      |     |     |     |      |     |     |     |     |     |      |     |     |      |
|---------|-------|-----|-----|-----|------|-----|-----|-----|------|-----|-----|-----|-----|-----|------|-----|-----|------|
| KB 14   | D. t. | 1,4 | 2,1 | 0,5 | 0,8  | 1,4 | 2,3 | 0,3 | 1,1  | 0,4 | 1,3 | 1,4 | 2,4 | 0,7 | 1,3  | 1,1 | 0,5 | 4,95 |
| KB 15   | D. t. | 1,5 | 3,2 | 0,7 | 1,7  | 1,5 | 3,0 | 0,3 | 1,5  | 0,5 | 1,2 | 1,5 | 2,9 | 0,8 | 1,6  | 1,4 | 0,6 | 4,92 |
| KB 17   | D. t. | 1,3 | 2,6 | 0,5 | 1,2  | 1,6 | 2,9 | 0,4 | 1,4  | 0,4 | 1,2 | 1,3 | 2,8 | 0,6 | 1,4  | 1,4 | 0,7 | 4,99 |
| KB 18   | D. c. | 0,8 | 3,1 | 0,2 | 2,4  | 1,5 | 3,2 | 0,4 | 1,9  | 1,0 | 2,5 | 1,2 | 3,0 | 0,8 | 1,3  | 2,0 | 1,2 | 5,56 |
| KB 19   | D. c. | 0,8 | 2,9 | 0,4 | 1,8  | 1,4 | 2,9 | 0,4 | 1,7  | 0,7 | 2,1 | 1,4 | 3,0 | 0,8 | 1,8  | 2,0 | 1,1 | 5,47 |
| KB 2    | D. c. | 0,9 | 2,9 | 0,3 | 1,4  | 1,5 | 2,9 | 0,7 | 1,6  | 0,9 | 2,6 | 1,2 | 3,6 | 0,7 | 2,1  | 2,2 | 1,5 | 5,45 |
| KB 20   | D. c. | 0,8 | 2,9 | 0,3 | 1,7  | 1,4 | 2,1 | 0,3 | 0,9  | 0,8 | 2,3 | 1,1 | 2,4 | 0,6 | 0,9  | 1,7 | 1,1 | 5,53 |
| KB 21   | D. c. | 0,7 | 2,6 | 0,3 | 1,8  | 1,2 | 2,8 | 0,3 | 1,7  | 0,5 | 1,7 | 1,3 | 2,5 | 0,6 | 1,2  | 1,5 | 0,9 | 5,71 |
| KB 22   | D. c. | 0,9 | 1,8 | 0,3 | 0,9  | 1,2 | 1,8 | 0,6 | 0,7  | 0,5 | 2,1 | 1,3 | 1,6 | 0,7 | 0,6  | 1,8 | 1,1 | 5,49 |
| KB 23   | D. t. | 1,3 | 2,2 | 0,6 | 0,8  | 1,3 | 2,0 | 0,4 | 0,7  | 0,4 | 1,1 | 1,3 | 2,2 | 0,3 | 1,0  | 1,4 | 1,1 | 4,95 |
| KB 24   | D. t. | 1,3 | 2,3 | 0,5 | 1,2  | 1,5 | 2,3 | 0,3 | 0,6  | 0,4 | 1,3 | 1,3 | 2,5 | 0,5 | 2,4  | 1,3 | 0,7 | 4,96 |
| KB 25   | D. c. | 0,8 | 2,8 | 0,3 | 1,6  | 1,2 | 3,1 | 0,6 | 1,4  | 0,5 | 1,8 | 1,5 | 2,5 | 0,6 | 1,0  | 1,9 | 1,3 | 5,56 |
| KB 26   | D. t. | 1,4 | 2,3 | 0,5 | 1,1  | 1,3 | 2,3 | 0,4 | 1,1  | 0,4 | 1,1 | 1,6 | 2,2 | 0,8 | 0,9  | 1,4 | 0,7 | 4,97 |
| KB 27   | D. c. | 0,7 | 1,9 | 0,2 | 1,1  | 1,4 | 2,1 | 0,3 | 0,9  | 0,5 | 1,7 | 1,4 | 2,2 | 0,7 | 0,8  | 1,6 | 1,0 | 5,46 |
| KB 28   | D. t. | 1,3 | 2,8 | 0,4 | 1,8  | 1,5 | 3,2 | 0,3 | 1,7  | 0,4 | 1,1 | 1,3 | 3,5 | 0,5 | 1,9  | 1,2 | 0,8 | 5,02 |
| KB 29   | D. t. | 1,5 | 2,6 | 0,4 | 1,2  | 1,2 | 2,2 | 0,4 | 0,9  | 0,4 | 1,4 | 1,4 | 2,1 | 0,7 | 0,8  | 1,4 | 0,7 | 5,08 |
| KB 30   | D. c. | 0,9 | 2,2 | 0,3 | 1,3  | 1,2 | 1,7 | 0,5 | 0,7  | 0,6 | 1,8 | 1,2 | 1,9 | 0,5 | 0,8  | 1,8 | 1,2 | 5,08 |
| KB 4    | D. t. | 1,4 | 2,9 | 0,5 | 1,2  | 1,5 | 2,8 | 0,5 | 1,4  | 0,4 | 1,4 | 1,5 | 2,8 | 0,7 | 1,4  | 1,6 | 0,9 | 5,04 |
| KB 5    | D. c. | 0,6 | 2,1 | 0,3 | 1,3  | 1,2 | 1,9 | 0,3 | 0,9  | 0,5 | 1,5 | 1,1 | 1,7 | 0,5 | 0,6  | 1,5 | 1,0 | 5,46 |
| KB 6    | D. z. | 1,6 | 3,8 | 0,4 | 1,8  | 1,6 | 3,5 | 0,5 | 2,1  | 0,5 | 1,7 | 1,5 | 3,9 | 0,5 | 2,4  | 1,9 | 1,4 | 4,88 |
| KB 7    | D. c. | 0,9 | 3,3 | 0,3 | 2,1  | 0,8 | 3,1 | 0,2 | 2,1  | 1,1 | 2,1 | 1,6 | 2,9 | 0,6 | 1,2  | 1,6 | 0,9 | 5,41 |
| KB 8    | D. t. | 1,4 | 2,6 | 0,5 | 1,1  | 1,4 | 2,5 | 0,3 | 0,9  | 0,4 | 1,3 | 1,2 | 2,2 | 0,6 | 0,8  | 1,4 | 0,7 | 4,99 |
| KB 9    | D. c. | 1,0 | 3,4 | 0,3 | 1,9  | 1,7 | 3,4 | 0,5 | 2,2  | 0,9 | 2,5 | 1,4 | 3,6 | 0,8 | 2,0  | 2,1 | 1,3 | 5,48 |
| KLA 01  | D. c. | 1,0 | 2,0 | 0,3 | 1,3  | 1,5 | 2,1 | 0,7 | 1,1  | 0,4 | 1,6 | 1,2 | 2,2 | 0,8 | 0,9  | 1,7 | 1,9 | 5,66 |
| KLA 02  | D. c. | 1,1 | 2,1 | 0,5 | 1,3  | 1,6 | 2,1 | 0,6 | 0,7  | 0,8 | 2,3 | 1,2 | 1,6 | 0,4 | 0,2  | 1,5 | 1,5 | 5,58 |
| KLA 03  | D. c. | 0,9 | 2,2 | 0,4 | 1,2  | 1,4 | 1,9 | 0,7 | 1,0  | 0,6 | 1,9 | 1,2 | 2,0 | 0,4 | 1,1  | 1,6 | 1,5 | 5,57 |
| KLA 04  | D. c. | 0,9 | 2,3 | 0,5 | 1,4  | 1,0 | 2,3 | 0,5 | 1,5  | 0,4 | 1,6 | 1,4 | 2,2 | 0,5 | 1,3  | 1,5 | 1,5 | 5,66 |
| KLA 05  | D. c. | 1,0 | 3,1 | 0,4 | 2,1  | 1,5 | 3,3 | 0,9 | 1,8  | 0,6 | 2,0 | 1,5 | 2,7 | 0,9 | 1,6  | 1,8 | 2,1 | 5,67 |
| KLA 06  | D. c. | 0,8 | 2,5 | 0,4 | 1,5  | 1,3 | 3,0 | 0,8 | 1,5  | 0,5 | 1,9 | 1,1 | 1,5 | 0,6 | 1,3  | 1,6 | 1,7 | 5,67 |
| KLA 07  | D. c. | 0,6 | 1,7 | 0,4 | 1,7  | 1,1 | 2,2 | 0,6 | 1,2  | 0,5 | 2,1 | 1,3 | 2,2 | 0,5 | 1,0  | 1,8 | 1,9 | 5,53 |
| KLA 08  | D. c. | 1,0 | 3,2 | 0,3 | 2,3  | 1,4 | 3,2 | 0,7 | 2,1  | 0,7 | 2,3 | 1,4 | 2,7 | 0,8 | 1,5  | 1,8 | 2,1 | 5,67 |
| KLA 09  | D. c. | 1,1 | 3,0 | 0,4 | 1,9  | 1,4 | 3,1 | 0,7 | 1,9  | 0,5 | 1,8 | 1,1 | 2,4 | 0,7 | 1,3  | 1,6 | 1,7 | 5,71 |
| KLA 10  | D. c. | 0,7 | 2,0 | 0,4 | 1,5  | 1,1 | 2,3 | 0,6 | 1,1  | 0,5 | 1,4 | 1,2 | 3,1 | 0,7 | 1,8  | 1,8 | 1,9 | 5,60 |
| KLA1    | D. c. | 3,3 | 3,2 | 0,4 | 1,8  | 1,2 | 2,5 | 2,1 | 1,5  | 0,6 | 2,0 | 1,4 | 2,6 | 0,7 | 1,6  | 2,0 | 1,3 | 5,55 |
| KLA2    | D. c. | 1,1 | 2,5 | 0,4 | 1,3  | 1,4 | 2,1 | 0,7 | 0,7  | 0,7 | 2,2 | 1,1 | 2,4 | 0,6 | 1,3  | 2,1 | 1,5 | 5,65 |
| KLA3    | D. c. | 1,1 | 2,2 | 0,5 | 1,6  | 1,4 | 2,3 | 0,7 | 0,8  | 0,7 | 2,3 | 1,1 | 2,1 | 0,7 | 0,7  | 2,3 | 1,6 | 5,57 |
| KLA4    | D. c. | 1,4 | 2,3 | 0,5 | 0,7  | 1,4 | 1,6 | 0,7 | 0,4  | 0,6 | 1,8 | 1,3 | 1,8 | 0,7 | 0,5  | 2,2 | 1,5 | 5,59 |
| KLA5    | D. c. | 1,1 | 1,5 | 0,4 | 0,9  | 1,7 | 1,8 | 0,9 | 0,9  | 0,7 | 3,2 | 1,2 | 2,8 | 0,5 | 1,2  | 2,6 | 2,1 | 5,51 |
| KNI 01  | D. a. | 2,1 | 2,2 | 0,5 | -0,1 | 2,3 | 2,1 | 0,9 | -0,1 | 0,4 | 2,6 | 1,9 | 1,9 | 0,7 | -0,2 | 2,6 | 2,7 | 6,37 |
| KNI 02  | D. a. | 1,9 | 1,7 | 0,5 | -0,3 | 2,0 | 1,8 | 0,5 | -0,1 | 0,9 | 2,3 | 1,9 | 1,6 | 0,7 | -0,3 | 1,5 | 1,6 | 7,19 |
| KNI 03  | D. t. | 1,3 | 1,9 | 0,3 | 0,7  | 1,5 | 2,2 | 0,4 | 1,1  | 0,3 | 0,9 | 1,4 | 1,9 | 0,7 | 1,0  | 1,3 | 1,5 | 5,31 |
| KNI 04  | D. t. | 1,3 | 2,4 | 0,5 | 0,7  | 1,6 | 2,4 | 0,4 | 0,6  | 0,3 | 0,8 | 1,4 | 2,5 | 0,7 | 0,8  | 1,4 | 1,5 | 5,04 |
| KNI 05  | D. t. | 1,5 | 2,7 | 0,5 | 1,0  | 1,7 | 2,4 | 0,5 | 0,7  | 0,4 | 1,1 | 1,4 | 2,6 | 0,6 | 1,4  | 1,3 | 1,4 | 5,01 |
| KNI 06  | D. t. | 1,6 | 2,1 | 0,6 | 0,7  | 1,4 | 2,2 | 0,5 | 0,5  | 0,3 | 1,4 | 1,4 | 2,6 | 0,6 | 1,1  | 1,3 | 1,4 | 5,02 |
| KNI 07  | D. a. | 1,7 | 1,8 | 0,7 | -0,2 | 1,6 | 1,7 | 0,5 | -0,1 | 0,8 | 2,3 | 1,9 | 1,6 | 0,8 | -0,2 | 2,2 | 2,2 | 7,19 |
| KNI 08  | D. a. | 2,5 | 1,9 | 0,8 | -0,2 | 2,2 | 2,1 | 0,6 | 0,0  | 0,7 | 1,7 | 2,3 | 2,8 | 1,0 | 0,6  | 2,1 | 2,2 | 7,25 |
| KNI 09  | D. a. | 1,7 | 1,6 | 0,6 | -0,2 | 1,5 | 1,7 | 0,6 | -0,1 | 0,6 | 2,0 | 1,7 | 1,5 | 0,6 | -0,3 | 1,9 | 1,9 | 7,38 |
| KNI 10  | D. a. | 2,3 | 2,2 | 1,0 | -0,2 | 1,9 | 2,0 | 0,6 | -0,3 | 0,8 | 2,3 | 2,2 | 2,3 | 1,0 | -0,5 | 1,8 | 1,8 | 7,32 |
| KR 1_10 | D. c. | 1,5 | 3,0 | 0,5 | 1,6  | 2,6 | 3,0 | 0,4 | 0,6  | 0,6 | 1,9 | 2,0 | 3,1 | 0,6 | 1,2  | 1,5 | 0,9 | 5,95 |
| KR 1_11 | D. t. | 1,7 | 2,6 | 0,3 | 0,8  | 1,7 | 2,4 | 0,3 | 0,9  | 0,4 | 1,7 | 1,5 | 2,7 | 0,4 | 0,9  | 1,5 | 1,2 | 4,90 |

|          |       |     |     |     |      |     |     |     |      |     |     |     |     |     |      |     |     |      |
|----------|-------|-----|-----|-----|------|-----|-----|-----|------|-----|-----|-----|-----|-----|------|-----|-----|------|
| KR 1_12  | D. t. | 1,2 | 1,9 | 0,4 | 0,7  | 1,3 | 1,9 | 0,4 | 0,7  | 0,2 | 0,8 | 1,3 | 1,9 | 0,6 | 0,6  | 1,0 | 0,5 | 4,87 |
| KR 1_13  | D. z. | 1,6 | 2,0 | 0,3 | 0,7  | 1,3 | 1,8 | 0,5 | 0,5  | 0,6 | 2,2 | 1,8 | 2,1 | 0,5 | 0,3  | 1,8 | 1,4 | 5,28 |
| KR 1_14  | D. t. | 1,5 | 2,5 | 0,4 | 0,8  | 1,6 | 2,6 | 0,4 | 1,1  | 0,6 | 0,7 | 2,1 | 2,3 | 0,6 | 0,6  | 1,5 | 0,9 | 4,91 |
| KR 1_15  | D. i. | 1,4 | 2,5 | 0,5 | 0,8  | 1,9 | 2,6 | 0,6 | 0,6  | 0,4 | 2,1 | 1,6 | 2,2 | 0,5 | 0,7  | 1,6 | 1,1 | 6,04 |
| KR 1_16  | D. t. | 1,1 | 2,1 | 0,6 | 1,1  | 1,4 | 2,0 | 0,3 | 0,6  | 0,3 | 1,5 | 1,1 | 2,5 | 0,6 | 0,8  | 1,4 | 0,7 | 4,87 |
| KR 1_17  | D. i. | 2,0 | 2,8 | 0,4 | 1,0  | 1,7 | 3,0 | 0,4 | 0,7  | 0,7 | 1,9 | 1,9 | 2,5 | 0,8 | 0,9  | 1,8 | 1,0 | 5,97 |
| KR 1_18  | D. a. | 2,6 | 3,4 | 0,8 | 0,8  | 2,4 | 3,6 | 0,6 | 1,3  | 0,8 | 2,4 | 2,4 | 3,9 | 0,6 | 1,3  | 1,6 | 1,0 | 7,05 |
| KR 1_19  | D. t. | 1,5 | 2,5 | 0,3 | 1,2  | 1,5 | 2,8 | 0,3 | 1,0  | 0,4 | 1,5 | 1,3 | 2,3 | 0,5 | 0,9  | 1,5 | 1,0 | 4,84 |
| KR 1_2   | D. c. | 1,6 | 4,3 | 0,5 | 2,6  | 1,6 | 4,0 | 0,6 | 2,7  | 0,9 | 2,9 | 1,5 | 3,5 | 0,9 | 1,9  | 2,2 | 1,3 | 5,41 |
| KR 1_20  | D. t. | 1,9 | 1,9 | 0,3 | 0,4  | 1,8 | 2,6 | 0,4 | 0,7  | 0,3 | 1,1 | 1,8 | 3,1 | 0,4 | 0,8  | 1,5 | 1,1 | 4,89 |
| KR 1_21  | D. a. | 2,3 | 2,9 | 0,6 | 0,3  | 1,6 | 2,7 | 0,6 | 1,0  | 0,9 | 2,1 | 1,2 | 2,4 | 0,7 | 0,8  | 1,2 | 0,5 | 7,12 |
| KR 1_22  | D. i. | 1,9 | 1,3 | 0,4 | 0,1  | 1,7 | 1,9 | 0,4 | 0,3  | 0,3 | 1,8 | 1,9 | 2,0 | 0,4 | 0,2  | 0,9 | 0,5 | 6,16 |
| KR 1_23  | D. i. | 2,3 | 4,0 | 0,4 | 1,3  | 2,2 | 4,1 | 0,7 | 1,7  | 0,7 | 1,2 | 1,9 | 3,8 | 0,5 | 1,4  | 1,3 | 0,9 | 5,95 |
| KR 1_24  | D. i. | 2,0 | 2,4 | 0,8 | 0,4  | 2,1 | 2,5 | 0,7 | 0,5  | 0,7 | 2,2 | 2,2 | 2,8 | 1,0 | 0,8  | 2,0 | 1,0 | 6,07 |
| KR 1_25  | D. t. | 1,2 | 2,7 | 0,4 | 0,9  | 1,3 | 2,5 | 0,3 | 1,1  | 0,6 | 1,2 | 1,4 | 2,7 | 0,4 | 0,7  | 1,5 | 1,1 | 5,05 |
| KR 1_29  | D. c. | 1,4 | 2,0 | 0,4 | 0,5  | 1,7 | 1,9 | 0,6 | 0,5  | 0,7 | 1,9 | 1,3 | 2,2 | 0,8 | 0,5  | 2,2 | 1,4 | 5,51 |
| KR 1_3   | D. i. | 1,2 | 2,0 | 0,4 | 0,7  | 1,6 | 2,4 | 0,5 | 0,4  | 0,5 | 1,6 | 1,8 | 2,2 | 0,8 | 0,4  | 1,7 | 0,9 | 6,00 |
| KR 1_31  | D. c. | 1,4 | 2,5 | 0,5 | 1,1  | 1,8 | 2,5 | 0,6 | 0,8  | 0,6 | 2,3 | 1,5 | 1,9 | 0,6 | 0,3  | 1,9 | 1,3 | 5,53 |
| KR 1_4   | D. t. | 1,3 | 3,7 | 0,4 | 1,9  | 1,7 | 3,2 | 0,6 | 1,6  | 0,9 | 2,2 | 1,9 | 3,4 | 0,8 | 1,1  | 2,3 | 1,5 | 5,28 |
| KR 1_6   | D. o. | 1,6 | 1,8 | 0,5 | 0,2  | 1,5 | 1,6 | 0,7 | 0,0  | 0,5 | 2,1 | 1,6 | 1,6 | 0,8 | 0,3  | 2,0 | 1,3 | 6,30 |
| KR 1_7   | D. i. | 1,9 | 3,0 | 0,5 | 1,0  | 2,0 | 2,9 | 0,5 | 0,9  | 0,6 | 1,4 | 1,8 | 2,7 | 0,8 | 0,7  | 1,6 | 0,9 | 5,91 |
| KR 1_8   | D. c. | 1,0 | 2,3 | 0,3 | 0,9  | 1,7 | 2,1 | 0,5 | 0,4  | 0,5 | 2,2 | 1,4 | 2,6 | 0,6 | 0,9  | 1,8 | 1,1 | 5,30 |
| KR 1_9   | D. o. | 1,7 | 3,0 | 0,7 | 0,6  | 2,5 | 3,0 | 0,9 | 0,4  | 0,7 | 2,5 | 1,6 | 2,5 | 0,8 | 0,5  | 2,7 | 1,9 | 6,24 |
| KR 2_1   | D. c. | 1,0 | 3,2 | 0,5 | 1,8  | 2,0 | 3,2 | 0,6 | 1,5  | 0,5 | 2,7 | 1,7 | 3,1 | 0,8 | 1,8  | 2,2 | 1,5 | 5,41 |
| KR 2_3   | D. c. | 1,4 | 2,0 | 0,3 | 0,5  | 1,6 | 1,5 | 0,3 | 0,4  | 0,6 | 1,5 | 1,5 | 1,8 | 0,4 | 0,3  | 1,4 | 1,0 | 5,48 |
| KR 2B_1  | D. c. | 0,9 | 1,4 | 0,2 | 0,6  | 1,4 | 1,8 | 0,5 | 0,6  | 0,4 | 1,3 | 1,5 | 1,9 | 0,5 | 0,1  | 1,5 | 0,9 | 5,52 |
| KR 2B_2  | D. c. | 0,8 | 1,9 | 0,3 | 0,5  | 1,5 | 1,8 | 0,2 | 0,4  | 0,4 | 1,2 | 1,4 | 1,5 | 0,4 | 0,6  | 1,2 | 0,8 | 5,52 |
| KR 2B_3  | D. c. | 1,3 | 1,5 | 0,5 | 0,6  | 1,5 | 2,1 | 0,4 | 0,9  | 0,8 | 1,9 | 1,5 | 1,9 | 0,6 | 0,2  | 2,2 | 1,5 | 5,58 |
| KR 3_1   | D. i. | 1,7 | 1,8 | 0,5 | 0,4  | 1,7 | 1,9 | 0,7 | 0,6  | 0,5 | 2,1 | 1,8 | 1,7 | 0,7 | -0,1 | 2,1 | 1,4 | 6,31 |
| KR 3_2   | D. i. | 1,4 | 2,3 | 0,6 | 0,4  | 1,9 | 2,4 | 0,6 | 0,4  | 0,8 | 2,1 | 2,0 | 2,2 | 0,7 | 0,5  | 1,9 | 1,2 | 6,12 |
| KR 4_1   | D. t. | 1,4 | 1,8 | 0,3 | 0,9  | 1,1 | 1,9 | 0,3 | 0,6  | 0,3 | 0,9 | 1,3 | 2,1 | 0,4 | 0,4  | 0,9 | 0,5 | 4,98 |
| KR 4_2   | D. a. | 1,9 | 1,5 | 0,8 | -0,4 | 1,8 | 1,5 | 0,5 | 0,2  | 0,6 | 2,2 | 2,1 | 1,4 | 0,7 | 0,4  | 1,1 | 0,4 | 7,18 |
| KR 4_3   | D. a. | 1,7 | 1,6 | 0,5 | -0,2 | 1,8 | 1,7 | 0,5 | -0,1 | 0,5 | 1,8 | 1,5 | 1,6 | 0,5 | -0,1 | 1,6 | 1,1 | 7,17 |
| KRK 1_1  | D. i. | 2,0 | 3,1 | 0,6 | 0,6  | 2,0 | 2,8 | 0,7 | 0,7  | 0,5 | 1,8 | 1,8 | 3,1 | 0,7 | 0,9  | 2,0 | 1,3 | 5,94 |
| KRK 1_2  | D. t. | 1,5 | 2,0 | 0,6 | 0,7  | 1,6 | 1,7 | 0,6 | 0,2  | 0,4 | 1,0 | 1,3 | 2,1 | 0,6 | 0,9  | 1,4 | 0,7 | 4,99 |
| KRK 1_3  | D. i. | 2,2 | 2,8 | 0,8 | 0,6  | 2,1 | 2,7 | 0,6 | 0,5  | 0,6 | 2,0 | 1,9 | 2,5 | 0,7 | 0,7  | 0,8 | 0,1 | 6,07 |
| KRK 3    | D. a. | 2,1 | 2,5 | 0,8 | 0,3  | 2,1 | 2,1 | 0,5 | 0,4  | 0,4 | 1,5 | 2,0 | 2,5 | 0,7 | 0,7  | 2,0 | 1,2 | 7,08 |
| KTI 01   | D. c. | 0,5 | 2,6 | 0,3 | 1,7  | 1,9 | 2,8 | 0,9 | 1,6  | 0,8 | 3,5 | 1,6 | 2,6 | 0,4 | 1,5  | 2,2 | 2,2 | 5,39 |
| KTI 02   | D. c. | 1,1 | 3,2 | 0,2 | 2,1  | 1,6 | 3,6 | 1,1 | 2,0  | 0,8 | 4,1 | 1,1 | 3,1 | 0,5 | 1,5  | 1,7 | 1,8 | 5,24 |
| KTI 03   | D. c. | 1,5 | 3,1 | 0,4 | 1,3  | 1,8 | 3,7 | 0,9 | 1,8  | 1,0 | 2,2 | 1,4 | 2,2 | 0,5 | 0,9  | 1,8 | 1,9 | 5,28 |
| KUB 01   | D. t. | 1,5 | 2,0 | 0,5 | 0,6  | 1,6 | 1,9 | 0,4 | 0,7  | 0,3 | 1,3 | 1,4 | 1,9 | 0,7 | 0,7  | 1,4 | 1,5 | 4,89 |
| KUB 02   | D. z. | 2,1 | 2,8 | 0,4 | 0,7  | 2,0 | 2,7 | 0,6 | 1,0  | 0,7 | 1,3 | 1,1 | 3,4 | 0,6 | 0,9  | 1,6 | 1,7 | 5,16 |
| KUB 03   | D. a. | 1,6 | 1,7 | 0,5 | -0,2 | 2,0 | 1,8 | 0,7 | 0,1  | 0,8 | 2,1 | 2,0 | 1,6 | 0,8 | -0,3 | 2,3 | 2,4 | 7,19 |
| KUB 04   | D. a. | 2,3 | 3,1 | 0,6 | 0,7  | 2,0 | 3,1 | 0,6 | 1,1  | 0,6 | 2,0 | 1,8 | 3,0 | 0,6 | 0,8  | 1,4 | 1,4 | 7,33 |
| KUB 05   | D. i. | 1,6 | 2,6 | 0,4 | 0,7  | 1,6 | 2,4 | 0,8 | 0,4  | 0,6 | 1,9 | 1,5 | 2,1 | 0,6 | 0,7  | 1,9 | 2,0 | 6,42 |
| KUB 06   | D. a. | 2,5 | 3,2 | 0,6 | 0,5  | 2,7 | 3,0 | 0,8 | 0,7  | 0,7 | 2,8 | 2,0 | 3,0 | 0,8 | 1,3  | 1,9 | 2,0 | 7,16 |
| KUB 07   | D. o. | 1,8 | 2,5 | 0,8 | 0,9  | 2,0 | 2,6 | 0,9 | 0,7  | 0,7 | 2,5 | 1,8 | 2,6 | 0,8 | 1,0  | 2,6 | 2,6 | 6,37 |
| KUB 08_1 | D. z. | 1,1 | 2,1 | 0,3 | 0,9  | 1,3 | 1,9 | 0,7 | 0,4  | 0,5 | 1,5 | 1,1 | 2,0 | 0,5 | 0,9  | 1,8 | 1,9 | 4,94 |
| KUB 08_2 | D. t. | 1,9 | 2,0 | 0,4 | 0,4  | 1,4 | 1,8 | 0,5 | 0,1  | 0,4 | 0,8 | 1,6 | 2,2 | 0,5 | 0,2  | 1,3 | 1,3 | 5,40 |
| KUB 08_3 | D. c. | 1,9 | 2,3 | 0,4 | 0,4  | 1,9 | 2,2 | 0,5 | 0,5  | 0,4 | 2,0 | 1,9 | 1,9 | 0,4 | 0,3  | 1,9 | 2,0 | 5,48 |

|         |              |     |     |     |      |     |     |     |      |     |     |     |     |     |      |     |     |      |
|---------|--------------|-----|-----|-----|------|-----|-----|-----|------|-----|-----|-----|-----|-----|------|-----|-----|------|
| KUB 09  | <i>D. c.</i> | 1,9 | 2,2 | 0,4 | 2,4  | 2,0 | 2,4 | 0,5 | 0,7  | 0,7 | 2,0 | 1,8 | 3,1 | 0,5 | 0,6  | 1,5 | 1,6 | 5,48 |
| KUB 10  | <i>D. a.</i> | 2,6 | 3,5 | 0,8 | 1,3  | 3,0 | 3,7 | 1,0 | 1,5  | 1,3 | 3,2 | 2,1 | 4,3 | 1,0 | 2,1  | 2,0 | 2,2 | 7,14 |
| KUB 11  | <i>D. a.</i> | 1,9 | 2,2 | 0,8 | 0,1  | 1,9 | 2,0 | 0,8 | 0,3  | 0,9 | 2,3 | 2,0 | 2,1 | 0,8 | 0,0  | 1,4 | 1,4 | 7,23 |
| KUB 12  | <i>D. a.</i> | 1,5 | 1,5 | 0,7 | -0,3 | 1,8 | 1,6 | 0,5 | -0,3 | 0,8 | 2,0 | 2,0 | 1,7 | 0,8 | -0,4 | 1,4 | 1,5 | 7,27 |
| KUB 13  | <i>D. o.</i> | 1,8 | 2,3 | 0,5 | 1,3  | 2,0 | 2,2 | 0,8 | 0,4  | 0,7 | 2,7 | 2,0 | 1,9 | 0,6 | -0,3 | 1,9 | 1,9 | 6,33 |
| KUB 14A | <i>D. o.</i> | 2,0 | 2,7 | 0,4 | 0,8  | 1,9 | 2,5 | 0,7 | 0,6  | 0,7 | 1,8 | 1,8 | 2,1 | 0,5 | 0,4  | 1,6 | 1,7 | 6,30 |
| KUB 14B | <i>D. o.</i> | 1,7 | 2,0 | 0,5 | 0,2  | 1,7 | 1,9 | 0,6 | 0,1  | 0,6 | 2,1 | 1,4 | 1,9 | 0,7 | 0,4  | 2,0 | 2,1 | 6,29 |
| KUB 15  | <i>D. z.</i> | 1,3 | 1,9 | 0,3 | 0,5  | 1,5 | 1,9 | 0,5 | 0,4  | 0,5 | 0,6 | 1,4 | 1,8 | 0,6 | 0,5  | 1,3 | 1,4 | 5,29 |
| KUB 16A | <i>D. i.</i> | 1,6 | 2,4 | 0,4 | 0,6  | 1,8 | 2,5 | 0,9 | 0,6  | 0,6 | 1,5 | 2,0 | 3,0 | 0,8 | 1,0  | 2,4 | 2,6 | 6,42 |
| KVIL1   | <i>D. a.</i> | 1,5 | 1,3 | 0,6 | -0,2 | 1,7 | 1,2 | 0,7 | -0,3 | 0,6 | 2,0 | 1,5 | 1,4 | 0,6 | -0,3 | 2,0 | 1,4 | 7,45 |
| LAK 01  | <i>D. a.</i> | 2,0 | 1,9 | 0,9 | 0,2  | 2,0 | 2,2 | 0,6 | 0,1  | 0,5 | 2,3 | 2,2 | 1,7 | 0,9 | -0,6 | 1,0 | 1,0 | 7,19 |
| LAK 02  | <i>D. a.</i> | 2,4 | 2,4 | 0,8 | 0,1  | 2,4 | 2,6 | 0,7 | -0,2 | 0,5 | 2,2 | 2,3 | 2,1 | 0,8 | 0,3  | 0,7 | 0,7 | 7,28 |
| LAK 03  | <i>D. a.</i> | 2,8 | 3,7 | 0,6 | 1,0  | 2,5 | 3,9 | 1,0 | 1,7  | 0,6 | 3,1 | 3,1 | 3,8 | 0,8 | 1,4  | 0,9 | 1,1 | 6,90 |
| LAK 04  | <i>D. i.</i> | 1,7 | 3,4 | 0,5 | 1,8  | 2,0 | 3,4 | 1,0 | 1,4  | 0,7 | 2,4 | 2,1 | 3,8 | 0,9 | 1,3  | 1,9 | 2,2 | 6,37 |
| LAK 05  | <i>D. i.</i> | 1,5 | 4,9 | 0,4 | 3,2  | 2,5 | 4,6 | 1,0 | 3,0  | 0,7 | 3,7 | 1,7 | 4,9 | 0,6 | 2,8  | 1,0 | 1,1 | 6,36 |
| LAK 06  | <i>D. a.</i> | 2,2 | 2,9 | 0,9 | 0,5  | 2,6 | 2,7 | 0,7 | 0,2  | 0,7 | 2,6 | 2,5 | 2,9 | 0,9 | 0,6  | 1,5 | 1,5 | 7,09 |
| MH1     | <i>D. o.</i> | 1,7 | 1,9 | 0,4 | 0,3  | 1,6 | 2,0 | 0,6 | 0,3  | 0,7 | 2,1 | 1,4 | 1,8 | 0,6 | 0,5  | 2,0 | 2,1 | 6,42 |
| MH10    | <i>D. o.</i> | 1,5 | 0,6 | 0,4 | 0,8  | 1,6 | 1,9 | 0,6 | 0,5  | 0,7 | 2,4 | 1,7 | 2,1 | 0,6 | 0,8  | 2,0 | 2,1 | 6,39 |
| MH2     | <i>D. t.</i> | 1,0 | 2,0 | 0,3 | 1,0  | 1,1 | 1,9 | 0,5 | 0,8  | 0,4 | 1,2 | 1,2 | 2,3 | 0,5 | 0,9  | 1,7 | 1,8 | 5,50 |
| MH3     | <i>D. o.</i> | 2,2 | 3,1 | 0,6 | 1,0  | 2,6 | 3,4 | 0,9 | 1,0  | 0,6 | 2,5 | 1,9 | 3,6 | 0,8 | 1,8  | 2,3 | 2,5 | 6,51 |
| MH4     | <i>D. o.</i> | 2,2 | 2,7 | 0,4 | 0,6  | 1,4 | 2,3 | 0,6 | 0,6  | 0,6 | 2,2 | 1,9 | 2,8 | 0,9 | 1,0  | 2,0 | 2,2 | 6,43 |
| MH5     | <i>D. a.</i> | 2,1 | 3,2 | 0,6 | 0,9  | 2,2 | 3,3 | 0,8 | 1,2  | 0,9 | 2,8 | 1,8 | 2,5 | 0,8 | 0,7  | 1,6 | 1,7 | 7,32 |
| MH6     | <i>D. o.</i> | 1,5 | 2,4 | 0,5 | 0,9  | 2,1 | 2,2 | 0,7 | 0,5  | 0,6 | 2,1 | 1,5 | 2,5 | 0,8 | 0,5  | 2,4 | 2,5 | 6,49 |
| MH7     | <i>D. o.</i> | 1,2 | 2,5 | 0,5 | 0,8  | 1,9 | 2,7 | 0,8 | 0,5  | 0,7 | 2,4 | 1,6 | 2,8 | 0,7 | 0,9  | 2,2 | 2,3 | 6,37 |
| MH8     | <i>D. o.</i> | 1,7 | 1,9 | 0,5 | 0,7  | 1,5 | 2,1 | 0,7 | 0,6  | 0,6 | 2,5 | 1,5 | 2,2 | 0,7 | 0,8  | 1,9 | 2,1 | 6,46 |
| MH9     | <i>D. o.</i> | 1,4 | 1,8 | 0,5 | 0,1  | 1,9 | 1,9 | 0,6 | 0,3  | 0,5 | 2,5 | 1,4 | 1,9 | 0,9 | 0,2  | 2,2 | 2,4 | 6,36 |
| OLS 1   | <i>D. a.</i> | 2,8 | 4,4 | 0,9 | 1,2  | 2,5 | 3,8 | 1,0 | 1,4  | 0,9 | 3,7 | 2,5 | 4,2 | 0,8 | 1,9  | 1,2 | 1,1 | 7,32 |
| OLS 10  | <i>D. a.</i> | 2,5 | 2,4 | 0,5 | 0,0  | 2,4 | 2,1 | 0,9 | -0,3 | 0,8 | 3,2 | 2,1 | 2,3 | 0,9 | -0,2 | 1,6 | 1,8 | 7,31 |
| OLS 11  | <i>D. o.</i> | 1,3 | 2,3 | 0,5 | 1,1  | 1,7 | 2,4 | 0,9 | 0,7  | 0,5 | 2,5 | 1,9 | 2,3 | 0,9 | 0,5  | 2,3 | 2,5 | 6,34 |
| OLS 12  | <i>D. i.</i> | 2,2 | 3,5 | 0,7 | 1,2  | 2,0 | 3,1 | 1,2 | 1,2  | 0,7 | 2,6 | 2,8 | 2,9 | 0,8 | 0,8  | 2,6 | 2,7 | 6,44 |
| OLS 13  | <i>D. o.</i> | 1,5 | 2,4 | 0,5 | 0,6  | 1,7 | 2,4 | 0,9 | 1,1  | 0,7 | 2,4 | 1,9 | 2,4 | 0,7 | 0,7  | 2,6 | 2,7 | 6,38 |
| OLS 14  | <i>D. a.</i> | 2,1 | 2,5 | 0,8 | 0,0  | 2,3 | 2,2 | 0,7 | -0,1 | 0,7 | 3,4 | 2,4 | 2,5 | 0,9 | -0,2 | 1,3 | 1,3 | 7,32 |
| OLS 15  | <i>D. a.</i> | 1,6 | 1,9 | 0,7 | -0,2 | 2,6 | 2,1 | 0,5 | -0,4 | 0,7 | 3,0 | 2,1 | 2,0 | 0,8 | -0,3 | 2,0 | 2,1 | 7,41 |
| OLS 16  | <i>D. a.</i> | 2,1 | 1,7 | 0,7 | -0,1 | 1,8 | 1,7 | 0,4 | -0,2 | 0,8 | 2,2 | 2,0 | 1,7 | 0,8 | -0,3 | 2,1 | 2,2 | 7,35 |
| OLS 17  | <i>D. a.</i> | 1,9 | 2,0 | 0,7 | 1,5  | 2,2 | 2,1 | 0,9 | -0,2 | 0,9 | 2,3 | 2,0 | 2,1 | 0,9 | -0,3 | 2,4 | 2,5 | 7,40 |
| OLS 18  | <i>D. a.</i> | 2,2 | 2,8 | 0,7 | 0,4  | 1,9 | 2,6 | 0,7 | 0,7  | 0,8 | 2,1 | 1,9 | 2,3 | 0,7 | 1,4  | 1,7 | 1,7 | 7,35 |
| OLS 19  | <i>D. a.</i> | 2,5 | 2,5 | 0,8 | 0,1  | 2,0 | 2,2 | 0,8 | 0,5  | 0,8 | 2,9 | 1,8 | 2,6 | 0,8 | 0,6  | 1,6 | 1,6 | 7,39 |
| OLS 2   | <i>D. a.</i> | 2,2 | 2,6 | 0,6 | 0,3  | 2,3 | 2,3 | 1,0 | 0,2  | 0,7 | 2,6 | 1,6 | 2,8 | 0,7 | 0,8  | 1,3 | 1,4 | 7,39 |
| OLS 3   | <i>D. a.</i> | 2,2 | 2,7 | 0,6 | 0,3  | 2,2 | 2,8 | 0,8 | 0,2  | 0,8 | 2,7 | 1,8 | 2,8 | 0,8 | 0,3  | 1,4 | 1,5 | 7,20 |
| OLS 4   | <i>D. a.</i> | 2,3 | 2,8 | 0,7 | 0,5  | 2,3 | 2,2 | 0,9 | 0,4  | 0,5 | 2,3 | 2,2 | 2,7 | 0,7 | 0,6  | 1,6 | 1,6 | 6,84 |
| OLS 5   | <i>D. a.</i> | 2,0 | 2,4 | 0,6 | 0,1  | 2,6 | 2,5 | 0,8 | 0,1  | 0,9 | 2,7 | 1,9 | 2,1 | 0,8 | -0,1 | 1,5 | 1,6 | 7,32 |
| OLS 6   | <i>D. a.</i> | 2,5 | 2,4 | 0,7 | 0,0  | 2,3 | 2,2 | 0,8 | 0,1  | 0,9 | 2,9 | 2,1 | 2,2 | 0,9 | -0,2 | 2,0 | 2,1 | 7,28 |
| OLS 7   | <i>D. a.</i> | 2,3 | 2,8 | 0,8 | 0,4  | 2,3 | 2,8 | 0,9 | 0,6  | 0,7 | 2,9 | 2,2 | 2,6 | 0,8 | 0,6  | 1,1 | 1,1 | 7,11 |
| OLS 8   | <i>D. a.</i> | 2,1 | 2,1 | 0,6 | -0,1 | 2,3 | 2,3 | 0,7 | 0,3  | 0,7 | 2,8 | 2,0 | 2,2 | 0,8 | 0,3  | 1,3 | 1,4 | 7,25 |
| OLS 9   | <i>D. a.</i> | 1,6 | 1,6 | 0,7 | 0,0  | 2,0 | 2,0 | 0,6 | 0,0  | 0,7 | 2,7 | 1,9 | 2,0 | 0,6 | 0,0  | 1,1 | 1,0 | 7,25 |
| OST 02  | <i>D. z.</i> | 1,1 | 2,6 | 0,4 | 1,6  | 1,5 | 2,6 | 0,6 | 1,1  | 0,5 | 1,4 | 1,2 | 2,7 | 0,5 | 1,6  | 1,8 | 1,8 | 5,28 |
| OST 03  | <i>D. z.</i> | 1,5 | 2,0 | 0,5 | 0,6  | 1,6 | 2,1 | 0,6 | 0,4  | 0,4 | 1,3 | 1,6 | 2,4 | 0,9 | 0,4  | 1,6 | 1,7 | 5,28 |
| OST 04  | <i>D. z.</i> | 1,4 | 3,2 | 0,6 | 1,7  | 1,4 | 2,8 | 0,7 | 1,3  | 0,5 | 1,5 | 1,5 | 2,9 | 0,9 | 1,8  | 1,8 | 2,0 | 5,32 |
| OST 05  | <i>D. z.</i> | 1,5 | 2,8 | 0,4 | 1,4  | 1,6 | 2,7 | 0,7 | 1,1  | 0,6 | 0,9 | 1,5 | 2,5 | 0,9 | 1,4  | 1,7 | 1,9 | 5,30 |
| OST 06  | <i>D. z.</i> | 1,6 | 2,9 | 0,4 | 1,0  | 2,2 | 2,6 | 0,7 | 0,9  | 0,4 | 1,2 | 1,9 | 2,2 | 0,7 | 0,7  | 1,8 | 2,0 | 5,20 |

|         |              |     |     |     |      |     |     |     |      |     |     |     |     |     |     |     |      |      |
|---------|--------------|-----|-----|-----|------|-----|-----|-----|------|-----|-----|-----|-----|-----|-----|-----|------|------|
| POL 1   | <i>D. t.</i> | 1,6 | 2,8 | 0,5 | 1,0  | 1,6 | 3,1 | 0,5 | 1,0  | 0,3 | 1,2 | 1,5 | 3,2 | 0,8 | 1,5 | 1,5 | 1,7  | 5,06 |
| POL 2   | <i>D. t.</i> | 1,7 | 2,2 | 0,5 | 0,5  | 1,6 | 2,4 | 0,5 | 0,6  | 0,3 | 1,4 | 1,5 | 2,4 | 0,8 | 0,4 | 1,5 | 1,6  | 4,98 |
| POL 4   | <i>D. t.</i> | 1,5 | 1,9 | 0,5 | 0,4  | 1,5 | 1,8 | 0,5 | 0,1  | 0,4 | 1,4 | 1,3 | 2,1 | 0,8 | 0,6 | 1,5 | 1,6  | 4,99 |
| POL 5   | <i>D. t.</i> | 1,6 | 3,4 | 0,6 | 1,2  | 1,8 | 3,4 | 0,7 | 0,9  | 0,4 | 1,5 | 1,7 | 3,4 | 0,8 | 1,2 | 1,8 | 1,9  | 4,92 |
| POL 6   | <i>D. t.</i> | 1,8 | 2,6 | 0,5 | 0,8  | 1,8 | 2,5 | 0,5 | 0,8  | 0,4 | 1,5 | 1,3 | 2,6 | 0,7 | 1,1 | 1,5 | 1,6  | 4,97 |
| POL 7   | <i>D. z.</i> | 1,9 | 4,4 | 0,5 | 2,8  | 2,2 | 4,6 | 0,6 | 2,5  | 0,6 | 1,6 | 1,1 | 3,3 | 0,5 | 1,4 | 1,6 | 1,6  | 5,22 |
| POL 8   | <i>D. t.</i> | 1,5 | 2,4 | 0,6 | 0,8  | 1,3 | 2,3 | 0,5 | 1,1  | 0,3 | 1,0 | 1,6 | 2,3 | 0,8 | 0,7 | 1,4 | 1,5  | 4,97 |
| POL 9   | <i>D. t.</i> | 1,7 | 2,5 | 0,4 | 0,6  | 1,6 | 2,2 | 0,4 | 0,5  | 0,4 | 1,3 | 1,5 | 2,3 | 0,6 | 0,7 | 1,3 | 1,4  | 4,98 |
| POL3    | <i>D. t.</i> | 1,7 | 3,2 | 0,4 | 1,4  | 1,8 | 3,2 | 0,5 | 1,3  | 0,4 | 0,9 | 1,5 | 2,8 | 0,6 | 1,0 | 1,4 | 1,5  | 5,07 |
| PRI 01  | <i>D. c.</i> | 0,6 | 2,4 | 0,3 | 1,6  | 1,5 | 2,2 | 0,8 | 1,5  | 0,8 | 2,9 | 1,0 | 2,4 | 0,5 | 1,4 | 2,0 | 2,1  | 5,52 |
| PRI 02  | <i>D. c.</i> | 1,0 | 3,1 | 0,4 | 2,5  | 1,5 | 2,9 | 0,9 | 1,7  | 0,9 | 3,3 | 1,1 | 2,5 | 0,7 | 1,8 | 2,3 | 2,5  | 5,59 |
| PRI 03  | <i>D. c.</i> | 0,6 | 3,0 | 0,3 | 2,0  | 1,9 | 2,6 | 0,7 | 1,8  | 0,6 | 3,5 | 1,0 | 2,6 | 0,3 | 1,4 | 1,6 | 1,7  | 5,56 |
| PRI 04  | <i>D. c.</i> | 1,1 | 4,5 | 0,4 | 3,3  | 1,7 | 4,0 | 0,8 | 2,5  | 1,2 | 3,5 | 1,6 | 3,5 | 0,3 | 2,2 | 2,7 | 2,7  | 5,47 |
| PRI 05  | <i>D. c.</i> | 1,0 | 3,1 | 0,3 | 2,2  | 2,0 | 2,9 | 0,6 | 1,5  | 0,8 | 3,4 | 1,4 | 3,4 | 0,4 | 1,8 | 2,0 | 2,1  | 5,46 |
| PRIL 01 | <i>D. a.</i> | 2,4 | 2,5 | 0,6 | 0,2  | 2,0 | 1,9 | 0,8 | 0,0  | 0,5 | 2,4 | 2,1 | 2,9 | 0,8 | 0,8 | 1,5 | 1,6  | 7,21 |
| PRIL 02 | <i>D. a.</i> | 2,7 | 3,8 | 1,0 | 1,4  | 2,7 | 3,8 | 0,8 | 1,3  | 0,8 | 2,9 | 2,3 | 4,0 | 0,8 | 2,3 | 1,8 | 1,7  | 7,20 |
| PRIL 03 | <i>D. c.</i> | 0,8 | 3,0 | 0,3 | 2,0  | 1,8 | 3,4 | 0,8 | 1,9  | 0,8 | 2,6 | 1,2 | 3,1 | 0,6 | 1,9 | 2,0 | 2,2  | 5,44 |
| PRIL 04 | <i>D. a.</i> | 2,1 | 3,3 | 0,6 | 1,1  | 2,5 | 3,4 | 0,8 | 1,1  | 0,8 | 3,5 | 2,3 | 3,5 | 0,7 | 1,0 | 1,8 | 1,9  | 7,25 |
| PRIL 05 | <i>D. a.</i> | 2,5 | 2,7 | 0,7 | 0,4  | 2,5 | 2,3 | 0,7 | -0,2 | 0,8 | 2,6 | 2,0 | 2,4 | 0,7 | 0,4 | 1,6 | 1,6  | 7,27 |
| PRIL 06 | <i>D. i.</i> | 1,6 | 3,5 | 0,5 | 1,7  | 2,0 | 3,4 | 1,0 | 1,2  | 0,7 | 2,8 | 1,8 | 3,5 | 0,6 | 1,3 | 2,3 | 2,3  | 6,23 |
| PRIL 07 | <i>D. c.</i> | 1,1 | 2,7 | 0,3 | 1,9  | 1,9 | 3,1 | 0,7 | 1,3  | 0,9 | 3,0 | 1,6 | 3,1 | 0,6 | 1,7 | 2,0 | 2,2  | 5,61 |
| PRIL1   | <i>D. a.</i> | 2,6 | 3,9 | 0,9 | 1,4  | 2,7 | 4,3 | 0,9 | 1,5  | 0,8 | 2,5 | 2,2 | 3,9 | 0,9 | 1,5 | 2,7 | 1,8  | 7,22 |
| PRIL2   | <i>D. c.</i> | 0,9 | 3,5 | 0,4 | 2,6  | 1,7 | 3,7 | 1,0 | 2,7  | 0,7 | 3,6 | 1,1 | 3,7 | 0,5 | 2,4 | 2,7 | 2,2  | 5,54 |
| PRIL3   | <i>D. c.</i> | 1,5 | 3,3 | 0,4 | 2,0  | 2,3 | 2,9 | 0,9 | 1,6  | 0,8 | 3,1 | 1,2 | 2,8 | 0,5 | 1,4 | 2,5 | 2,0  | 5,53 |
| PRIL4   | <i>D. c.</i> | 0,9 | 2,1 | 0,5 | 1,3  | 1,4 | 2,4 | 0,6 | 1,0  | 0,7 | 1,9 | 1,4 | 1,9 | 0,5 | 0,6 | 2,1 | 1,6  | 5,56 |
| R1      | <i>D. c.</i> | 1,3 | 2,3 | 0,3 | 0,7  | 1,9 | 2,1 | 0,6 | 0,3  | 0,8 | 2,2 | 1,4 | 2,4 | 0,3 | 0,6 | 1,8 | 1,5  | 5,51 |
| R10     | <i>D. i.</i> | 2,0 | 2,6 | 0,7 | 0,5  | 2,0 | 2,4 | 0,7 | 0,5  | 0,6 | 2,0 | 1,5 | 2,3 | 0,9 | 0,6 | 2,2 | 1,3  | 6,41 |
| R11     | <i>D. c.</i> | 0,7 | 1,8 | 0,3 | 1,3  | 1,5 | 1,8 | 0,6 | 0,7  | 0,4 | 2,0 | 1,4 | 2,2 | 0,5 | 1,1 | 2,0 | 1,5  | 5,51 |
| R12     | <i>D. c.</i> | 1,2 | 2,2 | 0,3 | 0,6  | 1,7 | 2,3 | 0,4 | 0,6  | 0,8 | 2,1 | 1,5 | 2,8 | 0,7 | 0,5 | 1,8 | 1,1  | 5,47 |
| R13     | <i>D. t.</i> | 1,3 | 1,7 | 0,5 | 0,4  | 1,4 | 1,6 | 0,5 | 0,4  | 0,3 | 1,5 | 1,0 | 1,3 | 0,6 | 0,4 | 1,5 | 0,8  | 5,22 |
| R14     | <i>D. t.</i> | 1,1 | 1,5 | 0,3 | 0,4  | 1,2 | 1,4 | 0,4 | 0,1  | 0,4 | 1,0 | 1,2 | 1,7 | 0,4 | 0,3 | 1,3 | 0,8  | 5,21 |
| R15     | <i>D. c.</i> | 0,9 | 2,4 | 0,3 | 1,4  | 1,6 | 2,5 | 0,8 | 0,8  | 0,6 | 2,3 | 1,1 | 2,1 | 0,5 | 0,9 | 1,9 | 1,4  | 5,52 |
| R17     | <i>D. c.</i> | 1,4 | 1,5 | 0,5 | 0,5  | 1,3 | 1,5 | 0,6 | 0,4  | 0,5 | 1,7 | 1,3 | 1,6 | 0,4 | 0,4 | 2,3 | 1,9  | 5,00 |
| R18     | <i>D. t.</i> | 1,2 | 1,6 | 0,4 | 0,4  | 1,2 | 1,4 | 0,3 | 0,3  | 0,2 | 1,2 | 1,1 | 1,5 | 0,7 | 0,2 | 1,3 | 0,6  | 5,10 |
| R19     | <i>D. i.</i> | 1,9 | 2,1 | 0,3 | 0,3  | 2,0 | 1,6 | 0,9 | 0,2  | 0,3 | 1,2 | 1,3 | 1,5 | 0,5 | 0,4 | 2,1 | 1,6  | 6,37 |
| R2      | <i>D. c.</i> | 1,7 | 2,4 | 0,7 | 2,5  | 1,6 | 2,3 | 0,6 | 0,6  | 0,4 | 1,8 | 1,6 | 2,3 | 0,7 | 0,9 | 1,7 | 1,1  | 5,29 |
| R20     | <i>D. c.</i> | 1,7 | 2,7 | 0,5 | 1,0  | 1,8 | 2,4 | 0,5 | 0,7  | 0,5 | 1,6 | 1,7 | 2,7 | 0,9 | 0,6 | 1,8 | 0,9  | 5,43 |
| R21     | <i>D. t.</i> | 1,1 | 2,2 | 0,5 | 1,0  | 1,5 | 2,6 | 0,5 | 0,6  | 0,5 | 1,8 | 1,4 | 2,2 | 0,7 | 0,6 | 1,5 | 0,8  | 4,95 |
| R23     | <i>D. i.</i> | 1,5 | 3,0 | 0,5 | 1,5  | 1,6 | 3,4 | 0,6 | 1,6  | 0,9 | 2,5 | 1,4 | 3,5 | 0,9 | 1,8 | 1,7 | 0,9  | 6,20 |
| R24     | <i>D. c.</i> | 1,1 | 1,9 | 0,3 | 0,6  | 1,3 | 1,4 | 0,5 | 0,2  | 0,5 | 1,6 | 1,2 | 1,7 | 0,4 | 0,5 | 1,7 | 1,3  | 5,37 |
| R26     | <i>D. a.</i> | 1,5 | 1,3 | 0,7 | -0,4 | 1,4 | 1,1 | 0,3 | -0,4 | 0,7 | 1,7 | 1,0 | 1,1 | 0,7 | 0,2 | 1,8 | 1,2  | 7,31 |
| R27     | <i>D. z.</i> | 1,6 | 3,0 | 0,5 | 1,8  | 1,7 | 3,7 | 0,7 | 2,1  | 0,6 | 2,0 | 1,4 | 2,9 | 0,7 | 1,9 | 1,9 | 1,3  | 5,10 |
| R28     | <i>D. c.</i> | 0,6 | 2,4 | 0,3 | 1,4  | 1,5 | 2,2 | 0,6 | 1,2  | 0,5 | 2,5 | 0,9 | 1,9 | 0,4 | 0,7 | 1,5 | 1,0  | 5,01 |
| R29     | <i>D. c.</i> | 1,4 | 2,3 | 0,3 | 1,1  | 1,7 | 2,0 | 0,4 | 0,4  | 0,8 | 2,1 | 1,5 | 1,6 | 0,3 | 0,8 | 1,7 | 1,4  | 5,54 |
| R3      | <i>D. c.</i> | 0,8 | 1,6 | 0,4 | 0,4  | 1,4 | 1,2 | 0,6 | 0,5  | 0,3 | 1,9 | 1,4 | 1,9 | 0,5 | 0,3 | 1,8 | 1,3  | 5,48 |
| R30     | <i>D. c.</i> | 1,1 | 2,8 | 0,5 | 2,1  | 1,6 | 2,4 | 0,8 | 1,0  | 0,6 | 2,1 | 1,5 | 2,7 | 0,3 | 1,2 | 1,9 | 1,5  | 5,53 |
| R31     | <i>D. a.</i> | 2,1 | 3,0 | 0,6 | 0,4  | 2,4 | 2,6 | 0,8 | 0,7  | 0,5 | 2,8 | 1,8 | 2,4 | 0,8 | 1,0 | 1,5 | 0,7  | 7,24 |
| R32     | <i>D. c.</i> | 0,5 | 2,1 | 0,4 | 1,9  | 1,3 | 1,8 | 0,5 | 0,7  | 0,5 | 1,8 | 1,3 | 2,0 | 0,4 | 0,5 | 1,8 | 1,3  | 5,41 |
| R33     | <i>D. c.</i> | 1,3 | 2,6 | 0,4 | 1,3  | 1,7 | 1,9 | 0,5 | 1,7  | 0,5 | 1,9 | 1,6 | 2,1 | 1,8 | 0,3 | 1,7 | -0,1 | 5,44 |
| R34     | <i>D. c.</i> | 0,9 | 1,9 | 0,3 | 0,9  | 1,4 | 1,9 | 0,5 | 0,5  | 0,6 | 2,2 | 1,5 | 1,8 | 0,6 | 0,7 | 1,5 | 0,9  | 5,01 |

|        |              |     |     |     |      |     |     |     |      |     |     |     |     |     |      |     |     |      |
|--------|--------------|-----|-----|-----|------|-----|-----|-----|------|-----|-----|-----|-----|-----|------|-----|-----|------|
| R35    | <i>D. o.</i> | 1,3 | 2,8 | 0,3 | 1,6  | 1,7 | 2,9 | 0,9 | 1,3  | 0,5 | 2,4 | 1,3 | 2,9 | 0,6 | 1,0  | 0,9 | 0,3 | 6,30 |
| R36    | <i>D. z.</i> | 1,1 | 1,8 | 0,5 | 0,6  | 1,3 | 1,9 | 0,5 | 0,6  | 0,3 | 1,2 | 0,7 | 1,7 | 0,6 | 0,8  | 1,4 | 0,8 | 5,44 |
| R37    | <i>D. t.</i> | 1,4 | 0,7 | 0,4 | 0,8  | 1,1 | 2,1 | 0,4 | 0,8  | 0,4 | 1,3 | 1,0 | 1,8 | 0,7 | 0,6  | 1,5 | 0,8 | 5,00 |
| R38    | <i>D. z.</i> | 1,1 | 1,7 | 0,4 | 0,6  | 1,3 | 1,5 | 0,4 | 0,4  | 0,3 | 1,3 | 1,2 | 1,2 | 0,6 | 0,5  | 1,4 | 0,8 | 5,28 |
| R39    | <i>D. i.</i> | 1,6 | 1,7 | 0,6 | 0,3  | 1,7 | 1,5 | 0,7 | 0,0  | 0,5 | 2,0 | 1,5 | 1,6 | 0,7 | 0,3  | 1,9 | 1,2 | 6,43 |
| R4     | <i>D. c.</i> | 1,3 | 2,4 | 0,5 | 0,9  | 1,4 | 2,3 | 0,7 | 0,7  | 0,5 | 1,7 | 1,4 | 2,0 | 0,7 | 0,9  | 1,6 | 1,0 | 5,37 |
| R40    | <i>D. c.</i> | 1,3 | 2,7 | 0,4 | 1,6  | 2,1 | 2,3 | 0,7 | 0,8  | 0,9 | 2,7 | 1,4 | 2,8 | 0,7 | 0,6  | 2,5 | 1,8 | 5,58 |
| R41    | <i>D. a.</i> | 1,9 | 2,3 | 0,6 | 0,6  | 2,0 | 2,2 | 0,9 | 0,4  | 0,6 | 2,5 | 1,2 | 2,0 | 0,8 | 0,4  | 2,1 | 1,3 | 7,39 |
| R42    | <i>D. t.</i> | 1,3 | 1,3 | 0,3 | 0,3  | 1,2 | 1,4 | 0,3 | 0,4  | 0,4 | 1,3 | 0,7 | 1,7 | 0,7 | 0,9  | 1,3 | 0,6 | 5,01 |
| R43    | <i>D. z.</i> | 1,1 | 1,6 | 0,3 | 0,4  | 1,3 | 1,6 | 0,4 | 0,5  | 0,4 | 1,3 | 1,3 | 1,5 | 0,3 | 0,5  | 1,2 | 0,9 | 5,36 |
| R44    | <i>D. c.</i> | 0,8 | 1,5 | 0,3 | 0,7  | 1,3 | 1,7 | 0,7 | 0,3  | 0,4 | 1,6 | 1,1 | 1,6 | 0,4 | 0,4  | 1,8 | 1,3 | 5,64 |
| R45    | <i>D. z.</i> | 1,3 | 2,1 | 0,6 | 0,5  | 1,5 | 1,9 | 0,5 | 0,6  | 0,6 | 1,8 | 1,9 | 2,2 | 0,6 | 0,6  | 0,7 | 0,1 | 5,26 |
| R5     | <i>D. t.</i> | 1,1 | 1,7 | 0,3 | 0,5  | 1,6 | 2,0 | 0,5 | 0,2  | 0,4 | 1,4 | 1,5 | 2,0 | 0,6 | 0,2  | 1,4 | 0,8 | 4,96 |
| R6     | <i>D. t.</i> | 1,5 | 2,0 | 0,5 | 0,3  | 1,5 | 1,9 | 0,5 | 0,7  | 0,3 | 1,8 | 1,3 | 1,8 | 0,6 | 0,4  | 1,8 | 1,2 | 5,22 |
| R7     | <i>D. c.</i> | 0,9 | 1,6 | 0,3 | 0,5  | 1,4 | 1,3 | 0,5 | 0,2  | 0,4 | 1,6 | 1,2 | 1,4 | 0,4 | 0,3  | 1,8 | 1,4 | 5,39 |
| R8     | <i>D. c.</i> | 0,9 | 1,9 | 0,3 | 0,7  | 1,2 | 2,0 | 0,8 | 0,7  | 0,3 | 1,9 | 1,1 | 1,9 | 0,7 | 0,6  | 2,1 | 1,3 | 5,62 |
| R9     | <i>D. a.</i> | 0,9 | 1,6 | 0,6 | 0,3  | 1,3 | 1,7 | 0,3 | -0,3 | 1,1 | 2,4 | 1,5 | 1,3 | 0,5 | 0,3  | 1,9 | 1,3 | 7,28 |
| RAK    | <i>D. a.</i> | 2,5 | 2,2 | 0,8 | -0,1 | 2,2 | 2,1 | 0,7 | 0,0  | 0,5 | 2,5 | 1,9 | 2,3 | 0,9 | 0,4  | 2,4 | 1,5 | 7,54 |
| RAMZ01 | <i>D. o.</i> | 2,0 | 3,0 | 0,5 | 1,0  | 2,3 | 2,5 | 0,7 | 0,3  | 0,6 | 1,7 | 1,8 | 2,5 | 0,7 | 0,8  | 1,9 | 2,1 | 6,32 |
| RAMZ02 | <i>D. t.</i> | 1,5 | 2,4 | 0,4 | 0,7  | 1,5 | 2,2 | 0,4 | 0,6  | 0,4 | 1,1 | 1,4 | 2,4 | 0,5 | 0,9  | 1,3 | 1,3 | 5,07 |
| RAMZ03 | <i>D. c.</i> | 1,4 | 3,7 | 0,6 | 2,5  | 1,3 | 3,4 | 0,6 | 2,0  | 0,5 | 1,9 | 1,2 | 2,6 | 0,5 | 1,3  | 2,0 | 1,9 | 5,53 |
| RAMZ04 | <i>D. a.</i> | 2,0 | 1,6 | 0,7 | -0,3 | 2,0 | 1,5 | 0,6 | -0,3 | 0,7 | 2,2 | 1,7 | 1,6 | 0,8 | -0,5 | 2,0 | 2,0 | 7,44 |
| RAMZ06 | <i>D. c.</i> | 1,5 | 3,5 | 0,5 | 1,9  | 1,5 | 3,0 | 0,7 | 1,6  | 0,7 | 2,1 | 1,5 | 2,9 | 0,7 | 1,4  | 2,2 | 2,3 | 5,47 |
| RAMZ07 | <i>D. c.</i> | 1,1 | 4,1 | 0,3 | 3,0  | 1,6 | 3,5 | 0,9 | 2,0  | 0,8 | 2,4 | 1,5 | 3,8 | 0,4 | 2,1  | 2,3 | 2,3 | 5,70 |
| RAMZ08 | <i>D. t.</i> | 1,6 | 1,7 | 0,4 | 0,1  | 1,7 | 1,9 | 0,4 | 0,1  | 0,4 | 1,2 | 1,5 | 1,7 | 0,6 | 0,2  | 1,5 | 1,6 | 4,98 |
| RAMZ09 | <i>D. z.</i> | 1,6 | 2,4 | 0,6 | 0,9  | 1,7 | 2,4 | 0,7 | 0,8  | 0,6 | 1,9 | 1,7 | 2,6 | 0,8 | 0,6  | 1,8 | 2,0 | 5,30 |
| RAMZ10 | <i>D. i.</i> | 2,2 | 2,7 | 0,8 | 0,5  | 2,3 | 2,2 | 0,8 | 0,6  | 0,5 | 2,1 | 2,0 | 2,6 | 0,8 | 0,6  | 2,0 | 2,0 | 6,41 |
| RAMZ11 | <i>D. i.</i> | 2,1 | 2,5 | 0,7 | 0,6  | 2,3 | 2,8 | 0,8 | 0,4  | 0,6 | 2,3 | 1,9 | 2,1 | 0,8 | 0,9  | 2,2 | 2,2 | 6,41 |
| RAMZ13 | <i>D. t.</i> | 1,5 | 2,4 | 0,6 | 0,9  | 1,8 | 2,0 | 0,3 | 0,5  | 0,3 | 0,9 | 1,4 | 2,5 | 0,7 | 0,9  | 1,1 | 1,2 | 4,98 |
| RYŽ 1  | <i>D. c.</i> | 1,5 | 3,6 | 0,6 | 2,1  | 2,0 | 3,3 | 0,9 | 1,7  | 0,8 | 1,9 | 1,6 | 3,1 | 0,8 | 2,0  | 2,0 | 1,3 | 5,42 |
| RYŽ 2  | <i>D. a.</i> | 1,8 | 2,3 | 0,4 | 0,4  | 1,8 | 2,2 | 0,7 | 0,5  | 0,5 | 1,8 | 2,0 | 2,4 | 0,7 | 0,4  | 2,0 | 1,2 | 7,12 |
| RYŽ 3  | <i>D. a.</i> | 1,8 | 2,1 | 0,5 | 0,4  | 1,8 | 1,9 | 0,7 | 0,2  | 0,5 | 1,9 | 1,5 | 2,0 | 0,6 | 0,4  | 0,7 | 0,1 | 7,20 |
| SRN    | <i>D. i.</i> | 2,5 | 4,0 | 0,7 | 1,3  | 2,3 | 3,5 | 0,9 | 1,5  | 0,8 | 2,3 | 2,1 | 3,9 | 0,9 | 1,9  | 2,8 | 1,9 | 6,12 |
| SRN 01 | <i>D. i.</i> | 2,2 | 2,9 | 0,4 | 0,9  | 2,1 | 2,8 | 0,8 | 1,0  | 0,5 | 2,2 | 2,0 | 2,6 | 0,6 | 0,6  | 2,3 | 2,4 | 6,08 |
| SRN 02 | <i>D. i.</i> | 2,4 | 3,0 | 0,5 | 0,7  | 2,2 | 3,0 | 0,8 | 0,8  | 0,5 | 1,2 | 2,0 | 3,2 | 0,8 | 0,9  | 2,5 | 2,6 | 6,08 |
| STA 1  | <i>D. o.</i> | 1,9 | 2,5 | 0,5 | 0,5  | 2,1 | 2,3 | 0,7 | 0,3  | 0,7 | 1,8 | 1,8 | 2,0 | 0,6 | 0,4  | 2,3 | 1,7 | 6,40 |
| STA 2  | <i>D. o.</i> | 2,2 | 2,5 | 0,7 | 0,4  | 2,4 | 3,1 | 1,0 | 0,3  | 0,6 | 2,2 | 1,8 | 2,3 | 0,8 | 0,8  | 2,2 | 1,4 | 6,49 |
| Š1     | <i>D. a.</i> | 1,8 | 2,0 | 0,4 | 0,1  | 1,9 | 2,2 | 0,6 | 0,4  | 0,5 | 1,7 | 1,6 | 1,9 | 0,6 | 0,4  | 1,4 | 0,8 | 7,09 |
| Š10    | <i>D. a.</i> | 2,3 | 1,6 | 0,6 | -0,7 | 1,7 | 1,6 | 0,6 | -0,5 | 0,8 | 2,2 | 1,9 | 1,4 | 0,9 | -0,6 | 2,3 | 1,4 | 7,28 |
| Š11    | <i>D. a.</i> | 2,1 | 2,1 | 0,8 | -0,4 | 2,2 | 1,9 | 0,5 | -0,1 | 1,1 | 2,3 | 2,2 | 2,2 | 0,7 | 0,4  | 2,1 | 1,5 | 7,28 |
| Š2     | <i>D. i.</i> | 1,6 | 2,8 | 0,6 | 1,4  | 1,9 | 3,0 | 0,8 | 1,1  | 0,7 | 2,3 | 1,8 | 3,1 | 0,9 | 1,2  | 2,0 | 1,2 | 6,37 |
| Š4     | <i>D. a.</i> | 2,2 | 2,7 | 0,8 | 0,2  | 2,3 | 2,1 | 0,8 | 0,4  | 0,7 | 2,5 | 1,9 | 2,4 | 0,8 | 0,2  | 2,5 | 1,7 | 7,30 |
| Š5     | <i>D. a.</i> | 1,9 | 2,8 | 0,5 | 0,5  | 2,1 | 3,0 | 0,6 | 1,1  | 0,4 | 1,8 | 2,3 | 1,9 | 0,7 | -0,2 | 1,8 | 1,2 | 7,19 |
| Š6     | <i>D. a.</i> | 2,1 | 2,2 | 0,7 | 0,2  | 2,1 | 2,4 | 0,7 | 0,5  | 0,6 | 2,3 | 1,8 | 1,8 | 0,7 | 0,4  | 1,1 | 0,4 | 7,31 |
| Š7     | <i>D. i.</i> | 1,8 | 1,9 | 0,5 | -0,2 | 1,6 | 1,7 | 0,6 | 0,2  | 0,5 | 1,5 | 1,5 | 1,7 | 0,7 | 0,3  | 1,7 | 1,0 | 6,34 |
| Š8     | <i>D. a.</i> | 2,0 | 1,5 | 0,7 | -0,5 | 2,1 | 1,7 | 0,6 | -0,5 | 0,8 | 2,1 | 1,4 | 1,4 | 0,8 | 0,4  | 1,8 | 1,0 | 6,90 |
| Š8     | <i>D. a.</i> | 1,7 | 1,4 | 0,4 | -0,3 | 1,9 | 1,4 | 0,5 | -0,1 | 0,7 | 1,9 | 1,6 | 1,1 | 0,5 | 0,1  | 1,8 | 1,2 | 6,90 |
| Š9     | <i>D. a.</i> | 2,4 | 3,5 | 0,9 | 1,4  | 2,1 | 3,7 | 0,9 | 1,5  | 0,8 | 2,9 | 2,2 | 3,1 | 0,8 | 1,0  | 1,6 | 0,8 | 7,33 |
| T1     | <i>D. c.</i> | 1,6 | 2,3 | 0,4 | 0,4  | 2,0 | 2,0 | 0,6 | 0,5  | 0,6 | 2,5 | 1,9 | 2,3 | 0,4 | 0,4  | 1,7 | 1,2 | 5,56 |
| T10    | <i>D. t.</i> | 1,5 | 2,5 | 0,5 | 0,6  | 1,4 | 2,5 | 0,4 | 0,9  | 0,3 | 0,9 | 1,3 | 2,4 | 0,6 | 0,7  | 1,4 | 0,7 | 5,01 |

|         |       |     |     |     |      |     |     |     |      |     |     |     |     |     |      |     |     |      |
|---------|-------|-----|-----|-----|------|-----|-----|-----|------|-----|-----|-----|-----|-----|------|-----|-----|------|
| T2      | D. t. | 1,4 | 1,9 | 0,4 | 0,6  | 1,4 | 2,2 | 0,4 | 0,9  | 0,2 | 1,3 | 1,5 | 2,4 | 0,5 | 0,4  | 1,4 | 0,8 | 5,00 |
| T3      | D. t. | 1,5 | 2,3 | 0,3 | 0,9  | 1,4 | 2,6 | 0,4 | 1,0  | 0,4 | 0,8 | 1,8 | 2,9 | 0,6 | 1,9  | 1,4 | 0,8 | 5,02 |
| T4      | D. t. | 1,7 | 2,0 | 0,4 | 0,4  | 1,4 | 1,7 | 0,4 | 0,3  | 0,5 | 1,4 | 1,4 | 2,3 | 0,5 | 0,6  | 1,5 | 0,9 | 5,28 |
| T5      | D. c. | 1,3 | 3,2 | 0,4 | 1,9  | 1,5 | 2,8 | 0,5 | 1,4  | 0,5 | 2,3 | 1,5 | 2,0 | 0,7 | 0,3  | 1,7 | 0,9 | 5,73 |
| T6      | D. z. | 1,7 | 3,2 | 0,4 | 1,4  | 1,6 | 3,0 | 0,5 | 1,5  | 0,5 | 1,5 | 1,5 | 3,0 | 0,7 | 1,6  | 1,9 | 1,2 | 5,40 |
| T7      | D. t. | 1,4 | 2,0 | 0,5 | 1,2  | 1,3 | 2,7 | 0,3 | 1,4  | 0,3 | 1,1 | 1,6 | 2,6 | 0,7 | 0,7  | 1,3 | 0,7 | 5,12 |
| T8      | D. t. | 1,5 | 2,3 | 0,3 | 0,8  | 1,5 | 2,3 | 0,4 | 1,1  | 0,3 | 0,9 | 1,7 | 2,3 | 0,5 | 0,8  | 1,3 | 0,8 | 5,09 |
| T9      | D. c. | 1,5 | 3,3 | 0,5 | 1,3  | 1,5 | 2,9 | 0,5 | 1,3  | 0,5 | 1,0 | 1,6 | 3,1 | 0,8 | 1,3  | 1,5 | 0,7 | 5,28 |
| TET 01  | D. a. | 1,9 | 2,1 | 0,6 | -0,1 | 1,9 | 2,1 | 0,6 | 0,1  | 0,5 | 2,2 | 2,0 | 1,8 | 0,8 | -0,1 | 2,5 | 2,6 | 7,36 |
| TET 02  | D. a. | 1,5 | 1,4 | 0,5 | -0,2 | 2,1 | 1,1 | 0,5 | -0,3 | 0,6 | 2,4 | 1,7 | 1,6 | 0,8 | -0,3 | 2,2 | 2,4 | 7,23 |
| TET 03  | D. a. | 2,0 | 1,9 | 0,7 | -0,3 | 1,8 | 1,7 | 0,4 | 0,1  | 0,7 | 2,2 | 1,6 | 1,7 | 0,8 | -0,1 | 2,7 | 2,8 | 7,24 |
| TET 04  | D. a. | 1,8 | 1,5 | 0,7 | -0,3 | 1,8 | 1,4 | 0,5 | -0,3 | 0,6 | 2,0 | 1,7 | 1,4 | 0,8 | -0,2 | 2,1 | 2,1 | 7,29 |
| VCE 01  | D. c. | 1,1 | 2,7 | 0,4 | 2,3  | 1,6 | 2,7 | 0,9 | 1,4  | 0,7 | 1,9 | 1,8 | 3,3 | 0,6 | 0,8  | 1,9 | 2,1 | 5,62 |
| VCE 02  | D. c. | 1,2 | 2,6 | 0,5 | 1,5  | 1,5 | 3,0 | 1,0 | 1,4  | 0,8 | 2,0 | 1,8 | 3,0 | 0,7 | 1,0  | 2,1 | 2,2 | 5,54 |
| VCE 03  | D. i. | 1,5 | 2,5 | 0,5 | 0,8  | 1,8 | 2,2 | 0,8 | 0,6  | 0,7 | 2,0 | 1,7 | 3,1 | 0,7 | 1,1  | 1,9 | 2,0 | 6,40 |
| VCE 04  | D. i. | 1,4 | 2,9 | 0,5 | 1,3  | 2,1 | 2,5 | 0,7 | 1,2  | 0,7 | 2,2 | 1,6 | 3,1 | 0,9 | 1,7  | 2,2 | 2,5 | 6,35 |
| VCE1    | D. c. | 0,8 | 3,1 | 0,5 | 1,8  | 1,4 | 2,9 | 0,8 | 1,6  | 0,8 | 2,4 | 1,3 | 3,1 | 0,6 | 1,6  | 3,0 | 2,3 | 5,71 |
| VCE2    | D. i. | 1,6 | 3,6 | 0,6 | 1,7  | 2,0 | 3,1 | 1,0 | 0,9  | 0,7 | 2,5 | 1,9 | 3,0 | 0,9 | 1,4  | 3,2 | 2,2 | 6,24 |
| VJ1     | D. c. | 0,9 | 3,3 | 0,3 | 2,1  | 1,9 | 3,1 | 0,6 | 1,6  | 0,9 | 4,0 | 1,1 | 2,6 | 0,4 | 1,4  | 1,3 | 0,9 | 5,55 |
| VJ2     | D. c. | 1,0 | 3,3 | 0,4 | 1,9  | 1,9 | 3,3 | 0,9 | 1,7  | 0,8 | 3,6 | 1,3 | 2,5 | 0,5 | 1,2  | 1,4 | 0,9 | 5,48 |
| VJ3     | D. c. | 0,9 | 2,6 | 0,3 | 1,4  | 1,6 | 2,1 | 0,9 | 1,6  | 0,8 | 3,2 | 1,3 | 2,2 | 0,4 | 0,6  | 1,4 | 1,1 | 5,35 |
| VJ4     | D. c. | 1,2 | 2,6 | 0,5 | 1,3  | 1,8 | 2,6 | 0,7 | 1,4  | 0,8 | 2,9 | 1,4 | 2,5 | 0,5 | 0,9  | 2,4 | 1,9 | 5,49 |
| VJ5     | D. c. | 1,3 | 3,1 | 0,4 | 1,7  | 2,0 | 3,1 | 1,0 | 1,0  | 0,8 | 2,9 | 1,1 | 2,9 | 0,7 | 1,6  | 1,9 | 1,2 | 5,50 |
| VLT 01  | D. a. | 1,8 | 1,9 | 0,7 | 0,2  | 1,9 | 2,0 | 0,9 | 0,1  | 0,6 | 2,7 | 1,9 | 2,5 | 0,9 | 0,5  | 2,7 | 2,8 | 7,19 |
| VLT 02  | D. a. | 1,5 | 1,7 | 0,5 | 0,0  | 1,9 | 1,4 | 0,8 | -0,2 | 0,6 | 1,9 | 2,0 | 1,5 | 0,6 | -0,4 | 1,9 | 1,9 | 7,15 |
| VLT 03  | D. a. | 1,6 | 1,8 | 0,7 | 0,0  | 1,9 | 1,9 | 0,7 | -0,1 | 0,6 | 2,5 | 1,9 | 1,7 | 0,7 | 0,1  | 2,1 | 2,2 | 7,37 |
| VLT 04  | D. i. | 1,2 | 3,3 | 0,4 | 2,3  | 2,4 | 3,2 | 1,0 | 1,1  | 0,7 | 2,5 | 2,3 | 3,5 | 0,7 | 1,0  | 1,1 | 1,3 | 6,41 |
| VLT 05  | D. a. | 2,3 | 2,7 | 0,7 | 0,4  | 2,4 | 2,8 | 0,9 | 0,5  | 0,8 | 2,0 | 2,0 | 2,5 | 0,8 | 0,4  | 1,0 | 1,0 | 7,20 |
| VLT 06  | D. i. | 1,7 | 3,6 | 0,6 | 1,7  | 2,4 | 3,9 | 1,1 | 1,4  | 0,7 | 2,6 | 1,8 | 3,9 | 0,8 | 1,6  | 2,4 | 2,5 | 6,31 |
| VLT 07  | D. c. | 1,4 | 4,5 | 0,5 | 2,6  | 2,3 | 4,6 | 1,0 | 2,5  | 1,0 | 3,1 | 1,3 | 4,4 | 0,4 | 2,6  | 1,4 | 1,4 | 5,91 |
| VLT 08  | D. i. | 1,8 | 4,8 | 0,6 | 2,5  | 2,8 | 4,0 | 1,1 | 1,3  | 0,8 | 3,0 | 2,5 | 4,8 | 0,9 | 2,8  | 2,9 | 3,1 | 6,31 |
| VÝSL 1  | D. c. | 1,0 | 2,6 | 0,6 | 1,2  | 1,5 | 2,0 | 0,5 | 0,8  | 0,7 | 1,8 | 1,6 | 2,3 | 0,6 | 0,7  | 2,1 | 1,5 | 5,32 |
| VÝSL 2  | D. c. | 1,2 | 3,0 | 0,5 | 1,7  | 1,8 | 2,6 | 0,8 | 0,7  | 0,7 | 2,3 | 1,5 | 3,0 | 0,8 | 1,4  | 2,3 | 1,5 | 5,43 |
| VÝSL 3  | D. c. | 1,0 | 2,9 | 0,5 | 1,2  | 1,9 | 2,5 | 0,8 | 0,5  | 0,8 | 2,2 | 1,6 | 2,9 | 0,9 | 1,1  | 1,9 | 1,0 | 5,36 |
| Z1      | D. a. | 1,4 | 1,2 | 0,6 | -0,1 | 1,5 | 1,0 | 0,0 | 0,7  | 0,7 | 2,0 | 0,8 | 1,3 | 0,7 | 0,2  | 1,7 | 1,0 | 7,43 |
| Z2      | D. a. | 1,0 | 2,0 | 0,7 | 0,0  | 1,9 | 1,9 | 0,0 | 0,5  | 0,5 | 2,3 | 1,0 | 1,8 | 0,8 | 0,6  | 1,6 | 0,8 | 7,31 |
| Z3      | D. a. | 1,7 | 2,2 | 0,5 | 0,6  | 2,2 | 2,5 | 0,0 | 0,2  | 0,8 | 2,4 | 1,1 | 2,2 | 0,6 | 0,6  | 1,7 | 1,1 | 7,50 |
| Z4      | D. a. | 1,2 | 2,0 | 0,6 | 0,5  | 1,7 | 1,6 | 0,0 | 0,4  | 0,6 | 2,1 | 1,4 | 1,6 | 0,7 | 0,3  | 1,6 | 0,9 | 7,31 |
| Z5      | D. a. | 1,4 | 2,4 | 0,7 | 0,5  | 2,1 | 2,3 | 0,0 | 0,2  | 0,7 | 2,6 | 1,4 | 1,9 | 0,8 | 0,6  | 1,9 | 1,0 | 7,39 |
| Z6      | D. a. | 1,2 | 1,7 | 0,8 | 0,3  | 1,9 | 1,8 | 0,0 | 0,3  | 0,8 | 2,7 | 1,4 | 2,0 | 0,9 | 0,7  | 1,9 | 1,0 | 7,44 |
| ZAD1    | D. a. | 2,2 | 2,7 | 0,8 | 0,1  | 2,7 | 2,8 | 1,0 | -0,1 | 0,6 | 2,8 | 2,2 | 2,5 | 1,0 | 0,6  | 3,2 | 2,2 | 7,20 |
| ZAD2_1  | D. i. | 2,4 | 3,3 | 0,8 | 0,8  | 2,7 | 3,2 | 3,6 | 0,7  | 0,7 | 2,6 | 2,4 | 3,4 | 1,0 | 0,8  | 2,8 | 1,8 | 6,38 |
| ZAD2_10 | D. i. | 2,1 | 2,7 | 0,7 | 0,6  | 2,3 | 2,7 | 0,8 | 0,6  | 0,5 | 2,3 | 1,6 | 2,7 | 0,8 | 0,7  | 2,1 | 1,4 | 6,27 |
| ZAD2_11 | D. c. | 0,9 | 2,2 | 0,5 | 1,0  | 1,4 | 2,0 | 0,7 | 0,8  | 0,6 | 2,0 | 1,3 | 2,0 | 0,8 | 0,9  | 2,0 | 1,1 | 5,65 |
| ZAD2_12 | D. i. | 1,9 | 2,1 | 0,5 | 0,3  | 1,9 | 2,1 | 0,7 | 0,2  | 0,5 | 1,9 | 1,5 | 2,2 | 0,8 | 0,2  | 1,9 | 1,1 | 6,36 |
| ZAD2_2  | D. i. | 2,7 | 3,6 | 0,7 | 0,9  | 2,8 | 3,3 | 1,1 | 0,9  | 0,8 | 3,2 | 2,4 | 3,4 | 0,9 | 1,2  | 3,5 | 2,6 | 6,28 |
| ZAD2_3  | D. a. | 2,3 | 1,9 | 0,8 | -0,3 | 2,0 | 2,1 | 0,6 | -0,1 | 0,6 | 2,3 | 2,6 | 2,2 | 0,8 | 0,1  | 2,3 | 1,5 | 7,19 |
| ZAD2_4  | D. i. | 1,9 | 2,8 | 0,6 | 0,7  | 2,0 | 2,5 | 0,8 | 0,6  | 0,7 | 2,2 | 1,8 | 2,4 | 0,9 | 0,3  | 2,5 | 1,6 | 6,48 |
| ZAD2_5  | D. i. | 2,1 | 2,5 | 0,8 | 0,3  | 2,1 | 2,2 | 2,4 | 0,2  | 0,7 | 2,1 | 1,9 | 2,8 | 0,9 | 0,8  | 2,2 | 1,3 | 6,35 |
| ZAD2_6  | D. c. | 0,9 | 2,8 | 0,5 | 1,4  | 1,7 | 2,0 | 0,7 | 0,7  | 0,5 | 2,1 | 1,6 | 2,8 | 0,7 | 1,7  | 2,3 | 1,5 | 5,67 |



|          |       |     |     |     |      |     |     |     |      |     |     |     |     |     |      |     |     |      |
|----------|-------|-----|-----|-----|------|-----|-----|-----|------|-----|-----|-----|-----|-----|------|-----|-----|------|
| ZAD2_7   | D. a. | 2,4 | 2,5 | 0,6 | 0,3  | 2,6 | 3,1 | 0,9 | 0,5  | 0,7 | 3,2 | 2,3 | 3,3 | 0,8 | 0,6  | 2,1 | 1,3 | 7,11 |
| ZAD2_8   | D. c. | 1,1 | 2,8 | 0,5 | 1,8  | 1,6 | 2,3 | 0,7 | 1,0  | 0,7 | 2,1 | 1,3 | 2,8 | 0,7 | 1,2  | 2,3 | 1,7 | 5,46 |
| ZAD2_9   | D. i. | 1,9 | 2,3 | 0,8 | 0,2  | 2,0 | 2,5 | 1,0 | 0,4  | 0,7 | 2,2 | 2,0 | 2,7 | 0,9 | 0,4  | 2,1 | 1,2 | 6,33 |
| ZLI 01   | D. i. | 1,4 | 2,5 | 0,5 | 1,1  | 2,0 | 2,6 | 1,1 | 1,0  | 0,6 | 2,4 | 1,5 | 2,6 | 0,6 | 0,7  | 2,0 | 2,1 | 6,21 |
| ZLI 02_1 | D. t. | 1,9 | 2,9 | 0,5 | 1,1  | 1,8 | 2,2 | 0,5 | 0,1  | 0,5 | 1,2 | 1,4 | 2,1 | 0,4 | 0,5  | 1,5 | 1,5 | 5,21 |
| ZLI 02_2 | D. z. | 1,4 | 2,0 | 0,4 | 0,6  | 1,6 | 2,0 | 0,6 | 0,4  | 0,5 | 1,3 | 1,7 | 2,1 | 0,6 | 0,9  | 1,8 | 1,9 | 5,17 |
| ZLI 03   | D. c. | 1,4 | 3,0 | 0,3 | 1,4  | 1,7 | 3,2 | 0,6 | 1,6  | 0,7 | 1,6 | 1,5 | 3,1 | 0,6 | 1,5  | 1,8 | 2,0 | 5,32 |
| ZLI 04   | D. z. | 1,7 | 3,4 | 0,5 | 1,5  | 2,0 | 3,4 | 0,6 | 1,4  | 0,6 | 1,3 | 2,1 | 3,5 | 0,7 | 1,3  | 1,6 | 1,6 | 5,15 |
| ZLI 05   | D. z. | 1,5 | 1,9 | 0,4 | 0,2  | 1,6 | 1,6 | 0,5 | 0,1  | 0,5 | 1,3 | 1,5 | 1,9 | 0,4 | 0,5  | 1,5 | 1,5 | 5,17 |
| ZLI 06   | D. o. | 2,2 | 2,7 | 0,6 | 0,3  | 2,0 | 2,5 | 0,7 | 0,6  | 0,5 | 2,3 | 2,0 | 2,7 | 0,9 | 0,6  | 2,2 | 2,4 | 6,19 |
| ZLI 07   | D. z. | 1,1 | 2,3 | 0,4 | 1,2  | 1,5 | 1,1 | 0,5 | 1,1  | 0,5 | 1,1 | 1,2 | 2,7 | 0,4 | 1,3  | 1,4 | 1,5 | 5,16 |
| ZLI 08   | D. a. | 2,1 | 2,4 | 0,7 | 0,0  | 2,2 | 2,5 | 0,8 | 0,1  | 0,9 | 3,4 | 1,8 | 2,2 | 1,0 | 0,7  | 2,0 | 2,2 | 7,14 |
| ZLI 09_1 | D. t. | 1,1 | 2,5 | 0,4 | 1,1  | 1,4 | 2,4 | 0,6 | 1,2  | 0,4 | 1,4 | 1,4 | 2,8 | 0,4 | 1,2  | 1,5 | 1,5 | 5,19 |
| ZLI 09_2 | D. i. | 1,1 | 2,5 | 0,5 | 2,7  | 1,6 | 2,3 | 0,6 | 1,2  | 0,6 | 2,2 | 1,9 | 2,5 | 0,7 | 1,0  | 1,8 | 1,9 | 6,38 |
| ZLI 10   | D. z. | 1,3 | 2,1 | 0,4 | 0,8  | 1,5 | 2,1 | 0,7 | 0,6  | 0,5 | 1,1 | 1,5 | 2,1 | 0,5 | 0,4  | 1,5 | 1,6 | 5,20 |
| ZLI 11   | D. a. | 1,8 | 2,4 | 0,7 | 0,0  | 1,8 | 2,2 | 0,9 | 0,2  | 0,8 | 2,4 | 1,9 | 1,8 | 0,7 | -0,1 | 1,7 | 1,8 | 7,32 |
| ZLI 12   | D. a. | 1,8 | 2,7 | 0,4 | 1,1  | 2,0 | 3,0 | 1,0 | 0,5  | 0,8 | 0,6 | 1,5 | 2,7 | 0,4 | 0,7  | 2,1 | 2,1 | 7,61 |
| ZLI 13   | D. o. | 2,0 | 2,8 | 0,6 | 0,7  | 2,0 | 2,6 | 0,6 | 0,5  | 0,6 | 1,5 | 1,5 | 2,7 | 0,7 | 1,4  | 1,8 | 1,9 | 6,02 |
| ZLI 14   | D. c. | 0,8 | 2,5 | 0,4 | 1,5  | 1,2 | 2,4 | 0,7 | 1,1  | 0,6 | 1,9 | 1,3 | 2,6 | 0,5 | 1,3  | 1,8 | 1,9 | 5,52 |
| ZLI 15_1 | D. z. | 1,2 | 3,0 | 0,5 | 1,5  | 1,4 | 3,0 | 0,6 | 1,5  | 0,6 | 1,2 | 1,5 | 2,9 | 0,7 | 1,0  | 1,7 | 1,8 | 5,21 |
| ZLI 15_2 | D. t. | 1,7 | 3,1 | 0,3 | 1,8  | 1,6 | 3,1 | 0,5 | 1,1  | 0,5 | 1,4 | 1,4 | 2,4 | 0,5 | 0,9  | 1,5 | 1,6 | 5,13 |
| ZMU 01   | D. a. | 1,9 | 1,6 | 0,7 | -0,3 | 1,5 | 1,7 | 0,8 | -0,1 | 0,8 | 2,0 | 1,9 | 1,4 | 0,8 | -0,6 | 2,1 | 2,2 | 7,25 |
| ZMU 02   | D. a. | 2,4 | 2,3 | 0,6 | -0,1 | 2,1 | 2,3 | 0,7 | 0,2  | 0,8 | 2,2 | 2,0 | 2,3 | 0,8 | 0,4  | 1,4 | 1,5 | 7,19 |

#### Northern Europe

| ID      | taxa  | v2  | v3  | v4  | v5   | v6  | v7  | v8  | v9   | v10 | v11 | v12 | v13 | v14 | v15  | v16 | v17 | GS (2C) |
|---------|-------|-----|-----|-----|------|-----|-----|-----|------|-----|-----|-----|-----|-----|------|-----|-----|---------|
| FIN 1/1 | D. z. | 1,3 | 2,8 | 2,4 | 1,3  | 1,4 | 2,6 | 0,6 | 1,1  | 0,5 | 1,5 | 1,5 | 2,6 | 0,8 | 1,2  | 1,9 | 1,0 | 5,24    |
| FIN 1/2 | D. z. | 1,3 | 2,5 | 0,6 | 1,1  | 1,5 | 2,5 | 0,6 | 0,8  | 0,5 | 1,8 | 1,5 | 2,4 | 0,6 | 0,8  | 1,8 | 1,2 | 5,13    |
| FIN 2   | D. c. | 1,4 | 2,1 | 0,5 | 0,7  | 1,7 | 2,5 | 0,6 | 0,8  | 0,5 | 2,1 | 1,6 | 2,6 | 0,6 | 0,7  | 2,0 | 1,3 | 5,36    |
| FIN 3/1 | D. c. | 1,1 | 4,4 | 0,6 | 2,9  | 1,7 | 3,6 | 0,8 | 1,5  | 0,6 | 2,5 | 1,4 | 4,1 | 0,8 | 2,4  | 2,1 | 1,2 | 5,46    |
| FIN 3/2 | D. c. | 0,9 | 2,7 | 0,4 | 2,1  | 1,2 | 3,4 | 0,7 | 1,9  | 0,7 | 2,3 | 1,3 | 3,0 | 0,7 | 1,5  | 2,1 | 1,4 | 5,4     |
| FIN 4/1 | D. c. | 1,0 | 3,0 | 0,5 | 1,8  | 1,5 | 2,8 | 0,8 | 1,3  | 0,5 | 1,9 | 1,5 | 2,9 | 0,9 | 1,6  | 2,0 | 1,1 | 5,42    |
| FIN 4/2 | D. c. | 1,1 | 2,4 | 0,5 | 1,1  | 1,4 | 2,4 | 0,6 | 0,9  | 0,6 | 1,5 | 1,3 | 2,6 | 0,9 | 0,6  | 1,8 | 0,9 | 5,22    |
| FIN 5/1 | D. c. | 1,1 | 3,5 | 0,6 | 2,1  | 1,6 | 3,4 | 0,8 | 1,8  | 0,8 | 2,4 | 1,7 | 4,0 | 0,8 | 2,2  | 2,6 | 1,7 | 5,54    |
| FIN 5/2 | D. c. | 5,3 | 3,1 | 0,5 | 1,6  | 1,9 | 3,2 | 0,9 | 1,6  | 0,9 | 2,9 | 1,4 | 3,0 | 0,8 | 1,4  | 2,8 | 2,0 | 5,49    |
| FIN 5/3 | D. c. | 1,0 | 3,2 | 0,7 | 1,9  | 1,7 | 3,1 | 0,7 | 1,6  | 0,7 | 2,1 | 1,6 | 2,8 | 0,8 | 1,5  | 2,1 | 1,3 | 5,44    |
| FIN 6/1 | D. c. | 1,5 | 2,0 | 0,6 | 0,4  | 1,4 | 2,0 | 0,6 | 0,3  | 0,5 | 1,5 | 1,1 | 1,6 | 0,9 | 0,6  | 1,4 | 0,5 | 5,47    |
| FIN 6/2 | D. z. | 1,4 | 2,3 | 0,5 | 0,5  | 1,7 | 2,2 | 0,6 | 0,7  | 1,4 | 1,4 | 1,4 | 2,0 | 0,6 | 0,6  | 1,6 | 1,0 | 5,14    |
| FIN 7/1 | D. c. | 1,2 | 2,2 | 0,6 | 0,9  | 1,7 | 2,2 | 0,7 | 0,8  | 0,6 | 2,0 | 1,4 | 2,3 | 0,8 | 0,8  | 2,2 | 1,3 | 5,4     |
| FIN 7/2 | D. c. | 1,0 | 2,0 | 0,5 | 1,0  | 1,4 | 2,1 | 0,7 | 0,7  | 0,6 | 2,1 | 1,2 | 2,2 | 0,8 | 0,6  | 2,1 | 1,3 | 5,31    |
| FIN 8/1 | D. c. | 0,9 | 2,9 | 0,6 | 2,4  | 1,6 | 2,7 | 0,8 | 1,5  | 1,0 | 2,5 | 1,6 | 2,7 | 0,9 | 1,3  | 2,2 | 1,3 | 5,43    |
| FIN 8/2 | D. c. | 1,1 | 3,2 | 0,6 | 2,1  | 1,6 | 3,2 | 0,8 | 1,9  | 1,0 | 2,6 | 1,5 | 3,0 | 1,0 | 1,4  | 2,6 | 1,6 | 5,44    |
| GPS21   | D. a. | 2,3 | 2,8 | 0,8 | -0,5 | 2,9 | 2,2 | 0,5 | 0,5  | 1,6 | 2,1 | 2,9 | 2,1 | 1,1 | -0,8 | 1,9 | 0,8 | 7,12    |
| NOR B/1 | D. a. | 1,9 | 1,8 | 0,8 | -0,2 | 1,7 | 1,7 | 0,5 | 0,1  | 0,7 | 1,6 | 2,5 | 2,1 | 1,0 | -0,2 | 2,0 | 1,1 | 7,12    |
| NOR B/2 | D. a. | 1,9 | 2,0 | 1,0 | -0,1 | 1,3 | 1,7 | 0,5 | -0,1 | 0,6 | 1,7 | 1,6 | 2,0 | 0,8 | 0,3  | 2,0 | 1,2 | 7,22    |
| NOR C/1 | D. c. | 1,1 | 2,9 | 0,6 | 1,8  | 1,8 | 2,8 | 0,7 | 1,3  | 0,6 | 2,3 | 1,7 | 3,0 | 0,8 | 1,3  | 2,1 | 1,3 | 5,61    |
| NOR C/2 | D. c. | 1,3 | 2,5 | 0,5 | 1,3  | 1,5 | 2,2 | 0,6 | 0,9  | 1,0 | 2,0 | 1,4 | 2,6 | 0,9 | 1,1  | 2,0 | 1,1 | 5,46    |
| NOR C/3 | D. c. | 1,0 | 2,5 | 0,5 | 2,5  | 1,5 | 2,3 | 0,6 | 0,8  | 0,6 | 2,0 | 1,4 | 2,4 | 0,9 | 1,1  | 1,9 | 1,0 | 5,47    |
| NOR1    | D. a. | 2,4 | 2,2 | 0,8 | -0,2 | 2,4 | 2,5 | 0,8 | 0,1  | 0,7 | 2,5 | 1,9 | 2,2 | 0,9 | 0,2  | 2,2 | 1,4 | 7,11    |

|         |              |     |     |     |      |     |     |     |      |     |     |     |     |     |      |     |     |      |
|---------|--------------|-----|-----|-----|------|-----|-----|-----|------|-----|-----|-----|-----|-----|------|-----|-----|------|
| NOR2    | <i>D. a.</i> | 2,1 | 1,5 | 0,6 | -0,5 | 1,9 | 1,5 | 0,5 | -0,3 | 0,7 | 2,0 | 1,9 | 1,5 | 0,8 | -0,3 | 2,0 | 1,2 | 7,29 |
| SC1     | <i>D. a.</i> | 2,1 | 2,3 | 0,8 | -0,5 | 3,4 | 2,6 | 0,6 | -0,1 | 1,7 | 2,2 | 1,6 | 2,6 | 0,9 | -0,7 | 1,9 | 1,0 | 7,07 |
| SC10    | <i>D. a.</i> | 2,2 | 2,2 | 1,0 | -0,4 | 1,9 | 2,2 | 0,4 | -0,5 | 1,2 | 2,2 | 1,6 | 2,0 | 0,9 | -0,7 | 1,9 | 1,0 | 7,04 |
| SC2     | <i>D. a.</i> | 3,4 | 2,8 | 1,0 | -0,9 | 3,6 | 2,8 | 0,5 | -0,8 | 1,2 | 1,9 | 3,3 | 2,9 | 1,1 | -1,0 | 1,9 | 0,9 | 7,06 |
| SC3     | <i>D. a.</i> | 1,1 | 1,3 | 0,8 | -0,7 | 1,8 | 1,3 | 0,3 | -0,4 | 1,3 | 2,4 | 2,6 | 1,4 | 0,8 | -1,2 | 2,2 | 1,4 | 7,1  |
| SC4     | <i>D. a.</i> | 2,4 | 2,6 | 0,8 | -0,2 | 1,9 | 2,0 | 0,8 | -0,2 | 0,7 | 2,1 | 2,9 | 2,2 | 0,8 | -0,7 | 2,4 | 1,5 | 7,03 |
| SC5     | <i>D. c.</i> | 0,8 | 2,1 | 0,2 | 1,1  | 1,6 | 2,4 | 0,5 | 0,9  | 0,7 | 2,8 | 1,1 | 2,2 | 0,7 | -0,4 | 1,9 | 1,2 | 5,43 |
| SC6/1   | <i>D. c.</i> | 1,4 | 3,5 | 0,8 | 1,9  | 1,8 | 4,2 | 1,0 | 2,7  | 1,3 | 2,2 | 1,8 | 3,9 | 1,1 | -1,4 | 2,8 | 1,7 | 5,49 |
| SC6/2   | <i>D. c.</i> | 1,2 | 2,3 | 0,5 | 1,3  | 2,1 | 2,6 | 0,8 | 0,8  | 0,9 | 2,5 | 0,9 | 2,7 | 0,8 | -1,5 | 2,3 | 1,6 | 5,51 |
| SC6/3   | <i>D. c.</i> | 1,9 | 2,9 | 0,5 | 1,2  | 1,8 | 2,4 | 0,7 | 0,9  | 1,2 | 2,5 | 1,2 | 2,8 | 0,7 | -1,3 | 2,1 | 1,4 | 5,49 |
| SC6/4   | <i>D. c.</i> | 1,4 | 2,7 | 0,6 | 0,8  | 2,0 | 2,3 | 0,8 | 0,8  | 0,9 | 3,0 | 1,2 | 2,3 | 1,0 | -1,3 | 2,3 | 1,3 | 5,51 |
| SC6/5   | <i>D. c.</i> | 1,6 | 3,4 | 0,7 | 1,4  | 1,7 | 3,9 | 0,8 | 1,9  | 0,6 | 2,3 | 1,4 | 3,3 | 0,8 | -0,8 | 2,0 | 1,2 | 5,43 |
| SC6/6   | <i>D. c.</i> | 1,1 | 2,2 | 0,5 | 1,3  | 1,8 | 2,1 | 0,7 | -0,4 | 2,0 | 2,1 | 1,1 | 2,5 | 0,9 | -1,2 | 2,3 | 1,5 | 5,42 |
| SC6/7   | <i>D. c.</i> | 1,0 | 2,1 | 0,4 | 1,1  | 1,9 | 2,5 | 0,6 | 1,1  | 0,7 | 2,1 | 1,4 | 2,2 | 0,7 | -1,3 | 1,8 | 1,0 | 5,44 |
| SC6/8   | <i>D. c.</i> | 1,2 | 1,8 | 0,5 | 0,7  | 1,3 | 1,8 | 0,7 | 0,9  | 0,7 | 2,4 | 1,2 | 2,2 | 0,8 | -1,5 | 2,2 | 1,4 | 5,5  |
| SC7     | <i>D. a.</i> | 1,2 | 1,5 | 0,8 | -1,2 | 2,1 | 1,4 | 0,3 | -0,3 | 0,9 | 2,0 | 1,4 | 1,1 | 0,8 | -0,6 | 2,0 | 1,3 | 7,08 |
| SC8     | <i>D. a.</i> | 2,5 | 3,0 | 1,0 | -0,9 | 2,5 | 3,0 | 0,4 | 0,3  | 0,7 | 2,1 | 2,3 | 3,2 | 0,9 | -0,9 | 2,1 | 1,2 | 7,01 |
| SC9     | <i>D. a.</i> | 2,6 | 2,6 | 0,8 | -0,3 | 2,9 | 2,4 | 0,3 | -0,1 | 1,1 | 2,1 | 1,7 | 2,6 | 0,8 | -0,9 | 2,0 | 1,2 | 6,98 |
| SK 1/1  | <i>D. a.</i> | 2,0 | 2,3 | 0,6 | 0,4  | 2,1 | 2,2 | 0,8 | 0,2  | 0,6 | 2,4 | 2,3 | 0,8 | 0,8 | 0,3  | 2,4 | 1,5 | 7,15 |
| SK 1/2  | <i>D. a.</i> | 2,2 | 2,7 | 0,8 | 0,1  | 2,4 | 2,4 | 0,8 | 0,1  | 0,8 | 2,6 | 2,5 | 0,9 | 0,9 | 0,5  | 2,4 | 1,5 | 7,26 |
| SK 1/3  | <i>D. a.</i> | 2,0 | 3,4 | 0,7 | 1,1  | 2,1 | 3,4 | 1,0 | 1,1  | 0,7 | 2,7 | 3,1 | 0,9 | 0,9 | 1,3  | 1,8 | 0,9 | 7,28 |
| SK 2/1  | <i>D. a.</i> | 2,3 | 1,8 | 0,6 | -0,4 | 2,0 | 1,7 | 0,7 | -0,1 | 0,6 | 2,4 | 1,8 | 0,9 | 0,9 | -0,1 | 2,3 | 1,4 | 7,18 |
| SK 2/2  | <i>D. a.</i> | 2,2 | 2,4 | 0,8 | -0,2 | 2,0 | 2,3 | 1,0 | 0,1  | 0,7 | 2,7 | 2,1 | 0,9 | 0,9 | 0,3  | 2,7 | 1,8 | 7,15 |
| SK 3/C  | <i>D. a.</i> | 2,0 | 1,9 | 0,6 | 0,0  | 1,8 | 2,1 | 0,7 | 0,1  | 0,5 | 1,9 | 1,8 | 1,8 | 0,8 | 0,2  | 2,4 | 1,6 | 7,11 |
| SK 3/D  | <i>D. a.</i> | 2,4 | 2,0 | 0,8 | -0,5 | 1,8 | 2,1 | 0,8 | 0,0  | 0,7 | 2,7 | 1,6 | 2,0 | 0,8 | 0,1  | 2,7 | 2,0 | 7,06 |
| SK 3A/1 | <i>D. a.</i> | 2,3 | 2,0 | 0,8 | -0,3 | 1,8 | 1,9 | 0,8 | -0,1 | 0,5 | 2,6 | 1,8 | 0,9 | 0,9 | -0,1 | 2,5 | 1,5 | 7,33 |
| SK 3A/2 | <i>D. a.</i> | 2,2 | 2,0 | 0,6 | 0,2  | 2,0 | 1,6 | 0,6 | -0,1 | 0,7 | 2,0 | 1,7 | 1,7 | 0,9 | -0,2 | 2,2 | 1,4 | 7,32 |
| SK 3A/3 | <i>D. a.</i> | 2,2 | 2,4 | 0,8 | 0,9  | 2,1 | 2,8 | 0,6 | 0,8  | 0,6 | 1,6 | 1,8 | 3,2 | 0,8 | 0,9  | 1,4 | 0,6 | 7,2  |
| SK 3B/1 | <i>D. a.</i> | 1,7 | 1,8 | 0,5 | 0,0  | 1,8 | 1,9 | 0,9 | 0,2  | 0,6 | 2,3 | 1,6 | 1,8 | 0,8 | 0,3  | 2,4 | 1,7 | 7,12 |
| SK 4/2  | <i>D. a.</i> | 2,4 | 2,7 | 0,7 | -0,1 | 2,5 | 2,4 | 1,1 | 0,1  | 0,7 | 2,5 | 2,0 | 2,4 | 1,0 | 0,5  | 2,6 | 1,6 | 7,28 |
| SK 4/3  | <i>D. a.</i> | 2,0 | 2,3 | 0,8 | -0,1 | 2,4 | 2,3 | 1,3 | 0,1  | 0,8 | 3,6 | 2,3 | 2,7 | 1,0 | -0,1 | 3,7 | 2,7 | 7,11 |
| SK 4/4  | <i>D. a.</i> | 2,0 | 1,9 | 0,7 | -0,1 | 2,1 | 2,0 | 0,7 | -0,1 | 0,6 | 2,6 | 1,9 | 1,8 | 0,7 | -0,2 | 1,9 | 1,2 | 7,04 |
| SK 4/5  | <i>D. a.</i> | 2,6 | 3,7 | 0,5 | 0,7  | 2,3 | 3,3 | 1,2 | 0,8  | 0,8 | 2,8 | 2,1 | 3,5 | 0,9 | 1,2  | 3,3 | 2,4 | 7,21 |
| VB      | <i>D. a.</i> | 2,2 | 2,1 | 0,9 | -0,1 | 2,3 | 1,9 | 0,8 | 0,1  | 0,7 | 3,3 | 2,1 | 1,0 | 1,0 | -0,6 | 3,2 | 2,1 | 7,24 |
